# Supplementary material for: Cost-effectiveness of an internet-based perioperative care programme to enhance postoperative recovery in gynaecological patients: economic evaluation alongside a stepped-wedge cluster-randomised trial
Source: PubMed Central journal article supplement — BMJ Open. 2018 Jan 21;8(1):e017782. doi: 10.1136/bmjopen-2017-017782 (PMC5780709; doi:10.1136/bmjopen-2017-017782), 2018-01-21
Supplement: bmjopen-2017-017782.draft_revisions.pdf [file bmjopen-2017-017782.draft_revisions.pdf]

# BMJ Open

BMJ Open is committed to open peer review. As part of this commitment we make the peer review history of every article we publish publicly available.

When an article is published we post the peer reviewers' comments and the authors' responses online. We also post the versions of the paper that were used during peer review. These are the versions that the peer review comments apply to.

The versions of the paper that follow are the versions that were submitted during the peer review process. They are not the versions of record or the final published versions. They should not be cited or distributed as the published version of this manuscript.

BMJ Open is an open access journal and the full, final, typeset and author-corrected version of record of the manuscript is available on our site with no access controls, subscription charges or pay-per-view fees (<http://bmjopen.bmj.com>).

If you have any questions on BMJ Open's open peer review process please email [editorial.bmjopen@bmj.com](mailto:editorial.bmjopen@bmj.com)

# BMJ Open

## Cost-effectiveness of an Internet-based perioperative care programme to enhance postoperative recovery in gynaecological patients: economic evaluation alongside a stepped-wedge cluster-randomised trial

|                                 |                                                                                                                                                                                                                                                                                                                                                                                                                                                                                                                                                                                                                                                                                                                                                                                                                                             |
|---------------------------------|---------------------------------------------------------------------------------------------------------------------------------------------------------------------------------------------------------------------------------------------------------------------------------------------------------------------------------------------------------------------------------------------------------------------------------------------------------------------------------------------------------------------------------------------------------------------------------------------------------------------------------------------------------------------------------------------------------------------------------------------------------------------------------------------------------------------------------------------|
| Journal:                        | <i>BMJ Open</i>                                                                                                                                                                                                                                                                                                                                                                                                                                                                                                                                                                                                                                                                                                                                                                                                                             |
| Manuscript ID                   | bmjopen-2017-017782                                                                                                                                                                                                                                                                                                                                                                                                                                                                                                                                                                                                                                                                                                                                                                                                                         |
| Article Type:                   | Research                                                                                                                                                                                                                                                                                                                                                                                                                                                                                                                                                                                                                                                                                                                                                                                                                                    |
| Date Submitted by the Author:   | 18-May-2017                                                                                                                                                                                                                                                                                                                                                                                                                                                                                                                                                                                                                                                                                                                                                                                                                                 |
| Complete List of Authors:       | Bouwsma, Esther; VU University Medical Center, Department of Obstetrics and Gynaecology; EMGO Institute for Health and Care Research<br>Bosmans, J; VU University Amsterdam, Department of Health Sciences, Faculty of Earth and Life Sciences; EMGO Institute for Health and Care Research<br>van Dongen, Johanna M.; VU University Amsterdam, Department of Health Sciences, Faculty of Earth and Life Sciences; EMGO Institute for Health and Care Research<br>Brölmann, Hans; VU University Medical Center, Department of Obstetrics and Gynaecology<br>Anema, Johannes; VU University Medical Center, Department of Public and Occupational Health; EMGO Institute for Health and Care Research<br>Huirne, Judith; VU University Medical Center, Department of Obstetrics and Gynaecology; EMGO Institute for Health and Care Research |
| <b>Primary Subject Heading</b>: | Obstetrics and gynaecology                                                                                                                                                                                                                                                                                                                                                                                                                                                                                                                                                                                                                                                                                                                                                                                                                  |
| Secondary Subject Heading:      | Health economics, Surgery                                                                                                                                                                                                                                                                                                                                                                                                                                                                                                                                                                                                                                                                                                                                                                                                                   |
| Keywords:                       | GYNAECOLOGY, Telemedicine < BIOTECHNOLOGY & BIOINFORMATICS, Minimally invasive surgery < GYNAECOLOGY, HEALTH ECONOMICS, Organisation of health services < HEALTH SERVICES ADMINISTRATION & MANAGEMENT, OCCUPATIONAL & INDUSTRIAL MEDICINE                                                                                                                                                                                                                                                                                                                                                                                                                                                                                                                                                                                                   |
|                                 |                                                                                                                                                                                                                                                                                                                                                                                                                                                                                                                                                                                                                                                                                                                                                                                                                                             |

SCHOLARONE™  
Manuscripts

1  
2  
3 **Title Page**  
4

5  
6 Full title:  
7

8 **Cost-effectiveness of an Internet-based perioperative care programme to enhance**  
9 **postoperative recovery in gynaecological patients: economic evaluation alongside a**  
10 **stepped-wedge cluster-randomised trial**  
11  
12

13  
14 Authors:  
15

16 Esther V A Bouwsma<sup>1,2,3</sup>, Judith E Bosmans<sup>3,4</sup>, Johanna M van Dongen<sup>3,4</sup>, Hans A M  
17 Brölmann<sup>1</sup>, Johannes R Anema<sup>2,3</sup>, Judith A F Huirne<sup>1,3</sup>  
18  
19

20  
21 Affiliations:  
22

- 23 1. Department of Obstetrics and Gynaecology, VU University Medical Center, Amsterdam,  
24 Netherlands  
25  
26 2. Department of Public and Occupational Health, VU University Medical Center,  
27 Amsterdam, Netherlands  
28  
29 3. EMGO Institute for Health and Care Research, Amsterdam, the Netherlands  
30  
31 4. Department of Health Sciences, Faculty of Earth and Life Sciences, VU University  
32 Amsterdam, Amsterdam, Netherlands  
33  
34

35  
36 Correspondence to:  
37

38 J.A.F. Huirne  
39 [j.huirne@vumc.nl](mailto:j.huirne@vumc.nl)  
40  
41

42  
43 Corresponding author during the review process:  
44

45 E.V.A. Bouwsma  
46 [ev.bouwsma@vumc.nl](mailto:ev.bouwsma@vumc.nl)  
47  
48  
49  
50  
51  
52  
53  
54  
55  
56  
57  
58  
59  
60

## **Abstract**

**Objectives** To evaluate the cost-effectiveness and cost-utility of an Internet-based perioperative care programme compared with usual care for gynaecological patients.

**Design** Economic evaluation from a societal perspective alongside a stepped-wedge cluster-randomised controlled trial with 12 months follow-up.

**Setting** Secondary care, nine hospitals in the Netherlands, 2011-2014.

**Participants** 433 employed women aged 18-65 scheduled for a hysterectomy and/or laparoscopic adnexal surgery.

**Intervention** An Internet-based care programme aimed at improving convalescence and preventing delayed return to work following gynaecological surgery was sequentially rolled out. Depending on the implementation phase of their hospital, patients were allocated to usual care (n=206) or the care programme (n=227).

**Main outcome measures** The primary outcome was duration until full sustainable return to work (RTW). Secondary outcomes were quality adjusted life years (QALYs), health-health-related quality of life and recovery.

**Results** At 12 months, there were no statistically significant differences in total societal costs (€-647; 95% CI €-2116 to €753) and duration until RTW (-4.1; 95% CI -10.8 to 2.6) between groups. The incremental cost-effectiveness ratio (ICER) for RTW was 56; each day earlier RTW in the intervention group was associated with cost savings of 56 euros compared to usual care. The probability of the intervention being cost-effective was 0.79 at a willingness-to-pay (WTP) of €0 per day earlier RTW, which increased to 0.97 at a WTP of €76 per day earlier RTW. The difference in QALYs gained over 12 months between the groups was clinically irrelevant resulting in a low probability of cost-effectiveness for QALYs.

**Conclusions** The care programme is considered cost-effective in comparison with usual care for duration until sustainable RTW after gynaecological surgery for benign disease. Future research should indicate whether widespread implementation of this care programme has the potential to reduce societal costs associated with gynaecological surgery.

**Trial registration** Netherlands National Trial Register NTR2933.

**Key words** gynaecology; Internet; telemedicine; self-management; convalescence; return to work; economic evaluation.

### **Strengths and limitations of this study**

- This is the first economic evaluation on an Internet-based care programme aimed at improving convalescence and preventing delayed return to work following gynaecological surgery.
- The study was conducted alongside a cluster-randomised controlled trial allowing prospective collection of relevant cost and effect data.
- The study was performed from a societal perspective and costs associated with lost productivity included both absenteeism as well as presenteeism costs.
- A latent barrier to future acceptance and implementation of the care programme lies in the fact that the costs and benefits of the care programme are separated between different types of stakeholders.

## **Main document**

### **Introduction**

At present, there is a transition of perioperative care from the hospital setting towards the home environment.<sup>1-4</sup> The introduction of advanced surgical techniques in combination with the implementation of “fast-track” clinical pathways have considerably reduced the length of postoperative hospital stays and many (complex) surgeries are now being performed in an ambulatory setting.<sup>5-7</sup> This is beneficial from the perspective of the healthcare system, as it leads to the containment of healthcare costs.<sup>1, 8</sup>

However, costs associated with lost productivity following surgery contribute to the total societal costs of surgical procedures as well, and are mostly not taken into account. Moreover, there is considerable evidence that the duration of sick leave following gynaecological surgery generally exceeds the period considered appropriate by specialists.<sup>9</sup> Therefore, preventing unnecessary prolonged recovery following gynaecological surgery, may translate into considerable savings for society.

We developed an Internet-based care programme for patients undergoing gynaecological surgery for benign disease, aimed at facilitating recovery after discharge and preventing delayed return to work.<sup>10, 11</sup> In this paper, we report on the cost-effectiveness and cost-utility of the Internet-based care programme compared to usual care. The findings on clinical effectiveness were reported in a separate paper.

### **Methods**

#### ***Study design and participants***

This economic evaluation was performed from a societal perspective and was carried out alongside a stepped-wedge cluster randomised controlled trial comparing an Internet-based care programme with usual care for patients undergoing benign gynaecological surgery. The study was done in the Netherlands between April 2011 and July 2014. The follow-up period was 12 months. The trial protocol has been published previously in accordance to CONSORT extended guidelines.<sup>9</sup>

The clusters in this trial were formed by separate hospitals. A total of nine hospitals participated, which were selected before the start of the trial. Hospitals were eligible if they

1  
2  
3 performed at least 100 hysterectomies or laparoscopic adnexal surgeries annually, and were  
4 located within 50km of the VU medical centre, Amsterdam, the Netherlands.  
5  
6

7  
8 Patients were recruited from the waiting lists for hysterectomy (abdominal, vaginal or  
9 laparoscopic) and laparoscopic adnexal surgery. Eligible participants were women aged 18-65  
10 who were employed for at least eight hours a week (unpaid or paid employment, or self-  
11 employed). We excluded patients who had severe benign comorbidity, had a malignancy,  
12 were pregnant, were computer or Internet illiterate, were involved in a lawsuit against their  
13 employer, were on disability sick leave before surgery, or had insufficient command of Dutch.  
14  
15  
16  
17  
18

### 19 ***Randomisation and blinding***

20  
21 Randomization took place at the level of the clusters and determined the order in which the  
22 intervention was implemented in the participating hospitals. The sequence was generated by a  
23 statistician using a computer generated list of random numbers. A stepped wedge approach  
24 was employed as it enabled us to study the implementation process as well.<sup>9</sup>  
25  
26  
27  
28

29  
30 Patients, clinicians and researchers could not be blinded for the intervention. However, group  
31 allocation was concealed until patients had agreed to participate and provided written  
32 informed consent. Data analysts (EB, JB) were masked to group allocation.  
33  
34  
35

### 36 ***Intervention care programme and implementation strategy***

37  
38 The development and content of the intervention care programme have been described  
39 elsewhere in more detail.<sup>9, 11</sup> A multi-faceted implementation strategy was employed to  
40 achieve maximal adoption of the care programme, targeting three different levels.  
41  
42  
43  
44

45 At the level of the organization, the structure of healthcare was changed by the introduction of  
46 the interactive web portal that was accessible for patients as well as their healthcare  
47 professionals. In addition, care managers were trained to help patients identify possible  
48 barriers to resuming work activities and could assist, if necessary, in the planning and  
49 execution of work resumption, before and after surgery.  
50  
51  
52  
53

54 At the level of the healthcare professional, educational training sessions were organised to  
55 introduce an earlier developed guideline on postoperative convalescence recommendations to  
56 stimulate evidence-based patient education.<sup>10</sup>  
57  
58  
59  
60

1  
2  
3  
4  
5  
6  
7  
8  
9  
10  
11  
12  
13  
14  
15  
16  
17  
18  
19  
20  
21  
22  
23  
24  
25  
26  
27  
28  
29  
30  
31  
32  
33  
34  
35  
36  
37  
38  
39  
40  
41  
42  
43  
44  
45  
46  
47  
48  
49  
50  
51  
52  
53  
54  
55  
56  
57  
58  
59  
60

At the patient level, the care programme consisted of two steps. First, all participants allocated to the intervention group received access to the web portal several weeks prior to their surgery (eHealth intervention). The interactive web portal facilitated self-management by providing patients with individual tailored convalescence recommendations throughout the entire surgical pathway as well as monitoring recovery postoperatively through an interactive self-assessment tool. Second, for those patients at risk of prolonged sick leave, a care manager was available to provide additional guidance in the process of resuming work activities (occupational intervention).

### *Usual Care*

Before the care programme was implemented in the hospitals, participating patients received usual care. Although considerable variation in usual care exists in the Netherlands, postoperative patients generally receive verbal instructions at discharge by a nurse and/or physician, sometimes accompanied by a letter or brochure. Usually, a postoperative consultation is planned six weeks after surgery. Due to Dutch legislation, employed patients who do not resume work within 6 weeks after the surgery are invited for a consultation with their occupational physician.

### *Main outcome measures*

The primary outcome was duration until sustainable return to work (RTW) defined as the resumption of own work or other work with equal earnings, for at least 4 weeks without (partial or full) recurrence of sick leave.<sup>12</sup> Data on return to work were collected by means of monthly electronic sick leave calendars.

Quality adjusted life years (QALYs) was one of the secondary outcomes and was measured using the Dutch version of the EuroQol five-dimensional questionnaire (EQ-5D-3L).<sup>13</sup> The Dutch tariff was used to estimate the utility of EQ-5D-3L health states.<sup>14</sup> QALYs were calculated by multiplying the utility with the amount of time a patient spent in a particular health state. Transitions between health states were linearly interpolated. Other secondary outcomes included health-related quality of life assessed by Short-Form Health Survey (SF-36)<sup>15</sup>, and recovery assessed by the Recovery Index (RI-10).<sup>16</sup> All secondary outcomes were assessed at baseline, and at 2, 6, 12, 26, and 52 weeks follow-up.



### *Service use and costs*

The intervention and implementation strategy costs consisted of costs related to implementing the new care programme. A bottom-up micro-costing approach was used for estimating intervention costs, using detailed data regarding the quantity and unit prices of: (1) the training sessions of involved healthcare professionals (clinical staff, occupational physicians, occupational therapist), (2) the eHealth intervention (hosting of web portal, administrator time), and (3) the occupational intervention (number and duration of consultations).<sup>17</sup>

Data on healthcare services used and support received by the participants were collected using electronic questionnaires during one year. Each month, the patient was asked to report service use over the previous month. Patients who were not sick listed and did not have any healthcare costs during three consecutive months, received a shortened version of the questionnaire. In case of no response, electronic reminders were sent after one and two weeks. If participants did not respond to the electronic reminders either, an additional attempt was made to complete the missing data per email, mail or telephone every three months.

Only healthcare utilization and support related to the gynaecological surgery were collected, and included the following categories: surgery and initial hospitalization, primary and secondary care including complementary medicine, medication and medical aids, home care and informal help.

Service utilization was valued using Dutch standard costs.<sup>18</sup> If these were unavailable, prices according to professional organizations were used. The prices of prescribed drugs were estimated using the prices of the Royal Dutch Society for Pharmacy.<sup>19</sup>

### *Productivity Loss*

Absenteeism costs were calculated using the Human Capital Approach (HCA). The net number of sick leave days during follow-up were multiplied by the estimated costs of one day of sick leave for females, stratified for age.<sup>18</sup> In case of partial sick leave, we assumed that participants were 100% productive during the hours of partial work resumption.

Presenteeism (i.e. reduced productivity while at work) was assessed monthly after full resumption of work using two items of the "Productivity and Disease Questionnaire" (PRODISQ).<sup>20</sup> Patients were asked to report the quantity (q1) and quality (q2) of the work

1  
2  
3 performed during the latest day at work on an 11-point scale, ranging from “nothing/very bad  
4 quality” (0) to “same as normal”(10).  
5  
6

7  
8 The level of presenteeism ( $Pres_{day}$ ) on the latest day at work was calculated using the  
9 following formula:  $Pres_{day} = (1 - ((q1 * q2) / 100))$ . Assuming linearity, the level of presenteeism  
10 on the latest day at work was then extrapolated over the total month. The total number of  
11 workdays lost due to presenteeism were calculated ( $Pres_{month}$ ) by multiplying the participants’  
12 presenteeism level by their number of days worked during that month. Subsequently,  
13 presenteeism costs per month were calculated by multiplying  $Pres_{month}$ , by the estimated costs  
14 of one day of lost productivity.  
15  
16  
17  
18  
19

20  
21 The index year of the study was 2014. Discounting of costs was not necessary because the  
22 follow-up was one year.<sup>21</sup>  
23  
24

### 25 26 *Statistical analysis*

27  
28 The sample size of the study (n=454) was calculated for detecting a relevant difference in  
29 return to work (hazard ratio (HR) of 1.5) in the main outcome study.<sup>9</sup> The economic  
30 evaluation was done according to the intention to treat principle. Missing cost and effect data  
31 during follow-up were imputed using multiple imputation by chained equations (MICE).  
32 Multiple imputation was done using SPSS 16.0 with predictive mean matching. An  
33 imputation model containing demographic and prognostic variables was used to create five  
34 complete datasets after which the loss of efficiency was smaller than 5%.<sup>22</sup> Rubin’s rules were  
35 used to pool effects and costs from the five imputed datasets.<sup>23</sup>  
36  
37  
38  
39  
40  
41

42  
43 Differences in costs and effects were estimated using linear multilevel regression analyses,  
44 while adjusting for type of surgery. Clustering at the hospital- and patient-level was accounted  
45 for in these multilevel models. For the cost-effectiveness and cost-utility analyses, we  
46 calculated incremental cost-effectiveness ratios (ICERs) by dividing the incremental costs by  
47 the incremental effects. The ICER indicates the additional investments needed for the  
48 intervention to gain one extra unit of effect compared with usual care. In the ICER for  
49 duration until RTW, productivity costs due to sick leave were excluded from the cost  
50 estimates to avoid double counting.  
51  
52  
53  
54  
55  
56  
57  
58  
59  
60

1  
2  
3 We used non-parametric bootstrapping with 5000 replications to estimate 95% confidence  
4 intervals around cost differences and the uncertainty surrounding the ICERs.<sup>24</sup> To account for  
5 the clustering of data, bootstrap replications were stratified for hospital.<sup>25</sup> Bootstrapped cost-  
6 effect pairs were plotted on cost-effectiveness planes (CE planes) and used to estimate cost-  
7 effectiveness acceptability curves (CEA curves). CEA curves show the probability that a  
8 treatment is cost effective in comparison with the control treatment at a specific ceiling ratio,  
9 which is the amount of money society is willing to pay to gain one extra unit of effect.  
10

### 16 *Sensitivity analyses*

17 To assess whether protocol deviations influenced the treatment effect, a per-protocol analysis  
18 was performed. In addition, to assess the robustness of the results, we carried out three  
19 sensitivity analyses. Firstly, we did a complete-case analysis to assess the cost-effectiveness  
20 of the interventions excluding patients who were lost to follow-up. Secondly, we replicated  
21 the cost-effectiveness analysis using the Friction Cost Approach. The FCA assumes that costs  
22 are limited to the friction period (i.e. the period needed to replace a sick worker). A friction  
23 period of 23 weeks and an elasticity of 0.8 was used. Thirdly, an analysis from the healthcare  
24 perspective was performed including only healthcare costs.  
25

26 All statistical analyses followed a predefined analysis plan and were done in SPSS (version  
27 16.0) and STATA (version 12SE).  
28  
29  
30

## 36 **Results**

### 37 *Participants*

38 During the study period, 1591 patients were scheduled for a hysterectomy and/or laparoscopic  
39 adnexal surgery in the participating hospitals. In total, 433 patients enrolled in the study, 206  
40 patients during the control phase and 227 patients during intervention phase (figure 1).  
41  
42  
43  
44

45  
46 Participants' demographic and prognostic variables are presented in table 1. Complete follow-  
47 up data were obtained from 92.6% of the participants on the primary outcome RTW, from  
48 71.8% on the secondary outcomes, and 70.0% on healthcare utilization. Baseline  
49 characteristics did not differ between participants with and without complete cost data, except  
50 that patients with complete data on healthcare utilization used the Internet more frequently  
51 than women with incomplete data.  
52  
53  
54  
55

### 58 *Service use and costs*

1  
2  
3 Table 2 presents the costs of self-reported service use per category over the 12 months of  
4 follow-up stratified by treatment group and the mean cost differences between both groups.  
5  
6

7  
8 Intervention costs were €80 per participant (online supplementary table S1). Total societal  
9 costs per patient were €12,266 in the intervention group and €13,795 in the usual care group.  
10 After correction for clustering by hospital and adjustment for surgery type, total societal costs  
11 in the intervention group were €647 lower compared to the usual care group, but this  
12 difference was not statistically significant (95% CI €-2116 to €753). In both groups, costs  
13 related to productivity losses were about two times higher than total healthcare costs. Both  
14 healthcare costs and lost productivity costs were lower in the in the intervention group  
15 compared to the usual care group, however, these differences were not statistically significant.  
16 Only costs for secondary care were significantly lower in the intervention group compared to  
17 the usual care group (€242 and €458, respectively).  
18  
19  
20  
21  
22  
23  
24  
25

### 26 *Effectiveness*

27  
28 The mean duration until RTW in the intervention group was 49.6 days versus 56.2 days in the  
29 usual care group. The adjusted difference in duration until RTW between intervention and  
30 usual care was -4.1 days (95% CI -10.8 to 2.6) (table 3). For the other outcomes, no  
31 statistically differences were found between both groups at 12 months either.  
32  
33  
34  
35

### 36 *Cost-effectiveness*

37  
38 The results of the cost-effectiveness analysis for duration until RTW are presented in table 4.  
39 The incremental cost-effectiveness ratio (ICER) for sustainable RTW was 56 indicating that  
40 each day earlier RTW in the intervention group is associated with cost savings of 56 euros in  
41 comparison with the usual care group. In the cost-effectiveness plane, 69% of the incremental  
42 cost effect pairs were located in the south east quadrant indicating that the intervention is  
43 more effective and less costly than usual care (figure 2a). The cost-effectiveness acceptability  
44 curve presented in figure 2b shows that if the societal willingness-to-pay (WTP) for one  
45 earlier day of RTW is €0, the probability that the intervention is cost-effective in comparison  
46 with usual care is 0.79. This probability increases to 0.97 at max if the WTP is €76 per day  
47 earlier RTW.  
48  
49  
50  
51  
52  
53  
54  
55

56 As the differences observed for the outcomes health-related quality of life and recovery after  
57 12 months were small and not significant, the ICERs for these outcomes were quite large. In  
58  
59  
60

1  
2  
3 the cost-effectiveness planes, the majority of cost-effect pairs were located in the southern  
4 quadrants, indicating the intervention was less expensive. However, the cost-effect pairs were  
5 roughly divided between the eastern and western quadrant indicating that the intervention can  
6 lead to both better and worse outcomes compared to usual care.  
7  
8  
9

### 10 11 *Cost-utility*

12 The difference in QALYs gained over 12 months between the two study groups was small and  
13 not statistically significant or clinically relevant (table 4). Therefore, the ICER for QALYs  
14 became extraordinary large (half million Euros). As a result, the probability that the  
15 intervention was cost-effective in comparison with usual care was considerably lower than for  
16 the primary outcome (0.77 at WTP is €0 per QALY gained and decreasing at higher WTP  
17 values).  
18  
19  
20  
21  
22  
23

### 24 25 *Per-protocol analysis*

26 In the per-protocol analysis 40 patients were excluded because they did not receive the care  
27 according to protocol due to several reasons: did not fit the inclusion criteria (n=3); had a  
28 more severe surgery than planned (n=25), or had a complicated postoperative course and  
29 needed a repeat surgery during follow-up (n=12). By excluding those patients, the difference  
30 in effect became larger, but was still not significant (-6.4 days, 95% CI -12.9 to 0.20) and the  
31 cost differences became statistically significant in favour of the intervention (mean difference  
32 €-359, 95% CI -866 to -11) (table 5). Hence, compared to the main analysis, the probability of  
33 cost-effectiveness increased considerably at a WTP of €0 per one day earlier RTW (from 0.79  
34 to 0.92).  
35  
36  
37  
38  
39  
40  
41  
42

### 43 44 *Sensitivity analyses*

45 The results of the primary outcome in the sensitivity analyses differed in some aspects from  
46 the main analysis (table 5). First, in the complete-case analysis, the effect difference between  
47 study groups became larger in favour of the intervention group, but the cost savings in the  
48 intervention group as compared to usual care became smaller. The probability of cost-  
49 effectiveness compared to the main analysis therefore decreased (from 0.79 to 0.55). Second,  
50 in the analyses performed from the healthcare perspective, cost savings became much smaller,  
51 as costs associated with lost productivity were not taken into account. As a result the  
52 probability of cost-effectiveness reduced (from 0.79 to 0.61). Finally, the results from the  
53  
54  
55  
56  
57  
58  
59  
60

1  
2  
3 friction cost analysis were identical to the intention to treat analysis, indicating that the  
4 majority of patients returned to their work before the end of the friction period of 23 weeks.  
5  
6

7  
8 The results of the per-protocol analyses and sensitivity analyses for the secondary outcomes  
9 QALYs, health-related quality of life and recovery are presented in online supplementary  
10 table S2. In the per-protocol analyses, cost differences became larger in favour of the  
11 intervention group, however, they did not reach statistical significance. The probability of  
12 cost-effectiveness at a WTP of €0 per unit of effect increased from 0.77 to 0.93. In contrast to  
13 the complete-case analysis for the primary outcome, the complete-case analyses for the  
14 secondary outcomes showed a statistical significant increase in cost savings in the  
15 intervention group. The probability of cost-effectiveness at a WTP of €0 per unit of effect  
16 increased from 0.77 to 0.98  
17  
18  
19  
20  
21  
22  
23

## 24 **Discussion**

25  
26 In this study, we evaluated the cost-effectiveness and cost-utility of a rigorously designed  
27 Internet-based perioperative care programme compared with usual care for gynaecological  
28 patients. Our results show that for the primary outcome duration until full resumption of  
29 work, the probability that the care programme is cost-effective is substantial: 0.79 at a  
30 willingness to pay of €0 per day earlier RTW, which increases to 0.97 at a willingness to pay  
31 of €76 per day earlier RTW.  
32  
33  
34  
35  
36  
37

## 38 ***Interpretation of the findings***

39  
40 In the current economic evaluation, the adjusted mean difference until RTW between study  
41 groups was not statistical significant (-4.1 days, 95% CI -10.8 to 2.6). Due to the skewness of  
42 RTW-data, presenting the median difference is more appropriate, however, this is not possible  
43 in economic evaluations. We hypothesise that this may have caused the difference in duration  
44 until RTW between study groups being statistical non-significant, while in fact, the difference  
45 might be of clinical relevance.  
46  
47  
48  
49  
50

51  
52 In addition, the cost-difference between the intervention group and the control group was not  
53 statistically significant either, although total societal costs were lower in the intervention  
54 group than in the control group. A possible explanation might be that the sample size of this  
55 study was based on the primary outcome full sustainable return to work, and, therefore,  
56  
57  
58  
59  
60

1  
2  
3 underpowered to detect relevant cost differences, as cost data are right skewed and require  
4 relative large samples.<sup>26</sup>  
5  
6

7  
8 Secondary care costs in the intervention group were significantly lower compared to the usual  
9 care group. The underlying mechanism should be investigated further, as it might indicate that  
10 patients receiving additional perioperative care were more confident in their own self-  
11 management skills preventing them from visiting a healthcare professional. In addition, costs  
12 associated with primary care were similar in both groups, demonstrating that the care  
13 programme did not cause a shift from secondary care to primary care in the intervention group  
14 compared to the usual care group. Concerns of increased workload in the primary care setting  
15 due to changes in perioperative care have been reported before, however, seem to be  
16 ungrounded.<sup>27, 28</sup>  
17  
18  
19  
20  
21  
22  
23

24 We did not find any clinical relevant differences in the secondary outcomes. Thus, despite the  
25 possible difference in the RTW rates between study groups, this did not have an effect on  
26 patients' perceptions about their quality of life and recovery. Possibly, the surgery itself has a  
27 much larger impact on these outcomes than the method of postoperative guidance.  
28  
29  
30  
31

32  
33 The results of the per-protocol analyses, were slightly more favourable than those of the main  
34 analyses. Thus, by presenting the care programme to the ideal target population, the  
35 probability of cost-effectiveness of the care programme in comparison with usual care  
36 increases. This is in concordance with our initial objective to develop Internet-based care  
37 programme for women undergoing an uncomplicated surgical procedure.<sup>10</sup> It may be  
38 challenging to identify future patients who will benefit most from the care programme, as  
39 complications cannot always be predicted pre-operatively. In addition, it should be  
40 investigated further what the needs are of patients with a complicated course and how they  
41 should best be guided and monitored during their recovery.  
42  
43  
44  
45  
46  
47  
48

### 49 ***Strengths and weaknesses of the study***

50  
51 Several strengths of the present study are noteworthy. First of all, we are not aware of other  
52 current perioperative interventions that aim at preventing unnecessary prolonged recovery and  
53 reducing sick leave in order to contain societal costs associated with gynaecological surgical  
54 care. Second, analyses were performed alongside a pragmatic trial, allowing prospective  
55 collection of relevant cost and effect data and enabling the evaluation of the intervention's  
56  
57  
58  
59  
60



1  
2  
3 cost-effectiveness under real world conditions.<sup>26</sup> The third strength concerns the use of linear  
4  
5 multilevel analyses to account for possible clustering of data as a result of the chosen study  
6  
7 design. Randomization at cluster level was chosen to prevent contamination between the  
8  
9 study arms. Moreover, the employment of a stepped wedge design allowed the sequential  
10  
11 implementation of the care programme in the participating hospitals, providing the possibility  
12  
13 to study the implementation process as well.

14  
15 Our study also has limitations. The first limitation is the collection of cost data through self-  
16  
17 reported retrospective questionnaires. However, since administrative data on service use are  
18  
19 very hard to obtain in the Netherlands, societal cost data can only be collected by means of  
20  
21 self-report. In order to prevent recall-bias, we minimised the recall period to only one month.  
22  
23 In addition, if there was recall bias, it seems unlikely that this systematically differed between  
24  
25 the study groups. Therefore, we expect that this does not affect our estimations. A second  
26  
27 limitation concerns the amount of incomplete data. Despite our efforts to obtain full data from  
28  
29 the patients in the trial, only 70.4% of the study population had complete cost data. Although  
30  
31 this is an acceptable rate of missing data, complete-case analyses may be biased and have less  
32  
33 precision.<sup>29, 30</sup> We tried to account for this by applying multiple imputation for missing data.<sup>31</sup>  
34  
35 Comparison of participants with complete and incomplete data resulted in a number of  
36  
37 variables that predicted the presence of missing data. Therefore, we concluded that the data  
38  
39 was missing at random, making multiple imputation the appropriate method to deal with the  
40  
41 missing data.

### 42 ***Comparison with other studies***

43 We showed that costs associated with productivity loss following gynaecological surgery  
44  
45 were about two times higher than healthcare costs. We are not aware of previously published  
46  
47 literature in the gynaecological field in which this was demonstrated before. As a matter of  
48  
49 fact, outcomes such as long-term convalescence, return to normal activities and absenteeism  
50  
51 following gynaecological surgery are under-reported in clinical trials. In a review of Roumm  
52  
53 et. al. assessing the clinical and economic benefits of minimal invasive surgery compared to  
54  
55 open alternatives, only five of the 19 eligible studies reported data on return to work or return  
56  
57 to normal activities, while 15 studies reported on hospital costs and all studies reported on  
58  
59 length of stay.<sup>32</sup> Similarly, in a recent Cochrane systematic review assessing the effectiveness  
60  
and safety of different surgical approaches to hysterectomy in women with benign



1  
2  
3 gynaecological disease, 45 of the 47 included studies reported on the length of postoperative  
4 hospital stay and only 19 studies reported data on return to normal activities.<sup>33</sup>  
5  
6

7  
8 Cost-effectiveness is one of the most frequently cited reason for developing Internet  
9 interventions, because of the relative low delivery costs and the potential high impact.<sup>34</sup>  
10  
11 However, economic evaluations are mainly lacking. A recent systematic review that evaluated  
12 the effect of perioperative e-Health interventions on the postoperative course, concluded that  
13 only 6 of 19 included studies reported on costs and in only one study a full economic  
14 evaluation was performed.<sup>35</sup> Thus, the current study addresses this literature gap as well.  
15  
16  
17

### 18 19 ***Policy implications and recommendations***

20  
21 Whether the perioperative Internet-based care programme under study is considered cost-  
22 effective in comparison with usual care in accelerating return to work following  
23 gynaecological surgery depends on society's willingness to pay for a reduced sick leave day,  
24 as well as the probability of cost-effectiveness that is considered acceptable. Our results show  
25 that the probability of cost-effectiveness is 0.97 at a WTP of €76 per day earlier RTW.  
26  
27 Considering that on average the costs of a day of sickness absence are €230,<sup>18</sup> we expect that  
28 this intervention can be considered cost-effective in comparison with usual care.  
29  
30  
31  
32  
33

34  
35 A latent barrier to future acceptance and implementation of the care programme lies in the  
36 fact that the costs and benefits of the care programme are separated between different types of  
37 stakeholders. In the Netherlands, medical costs are paid by the government and health  
38 insurance companies and sickness benefits are the main responsibility of the employers,  
39 which makes the shifting of costs across these sectors hard. As follows, investments are made  
40 in the healthcare sector for implementing the care programme and changing care processes,  
41 while the largest benefits accrue to employers through reduced lost productivity costs.  
42  
43 However, many countries have an employer-provided health insurance (e.g. the United  
44 States), and in those countries this Internet-based care programme is much more likely to be  
45 adapted as investments in the Internet-based care programme may directly lead to savings  
46 through improved productivity rates.  
47  
48  
49  
50  
51  
52

### 53 54 **Conclusions**

55  
56 The encouraging outcomes of this trial show that there is an economic case for supporting  
57 patients in the perioperative period with an Internet-based care programme. The care  
58  
59  
60

1  
2  
3 programme has a potential to lead to societal cost savings as a result of a reduction in the  
4 duration until full sustainable RTW. If society is willing to pay €76 per day earlier RTW, the  
5 care programme is considered cost-effective in comparison with usual care in women  
6 undergoing benign gynaecological surgery. Policy makers should investigate how these  
7 monetary benefits can be distributed across stakeholders.  
8  
9  
10

### 11 12 13 **Acknowledgements**

14 We thank the participants of this trial. Mr. D. Stomp is thanked for his extensive role in  
15 developing the web portal. Mr. D. Knol is thanked for his statistical contributions in the  
16 earlier phases of this research. Ms. A. Scholten is thanked for her role in the recruitment of  
17 patients.  
18  
19  
20

### 21 22 23 **Contributorship statement**

24 All named authors made substantial contributions to this study and the article. EVB, HAB,  
25 JRA, and JAH participated in the design and/or execution of the study, the interpretation of  
26 data, and the drafting and/or revision of the article. JEB and JMD were involved in the  
27 statistical data analyses and interpretation of the data, and the revision of the article. All  
28 named authors approved the final version of the manuscript. EVB and JAH are the study  
29 guarantors.  
30  
31  
32  
33  
34  
35

### 36 37 **Funding statement**

38 This study is funded by the Netherlands Organisation for Scientific Research and  
39 Development (ZonMw grants 171102015 and 92003590). ZonMw did not have any  
40 involvement in the study design, data collection, analysis or interpretation, nor in writing the  
41 report and decision to submit for publication. The views expressed in this report are those of  
42 the authors and not necessarily of those of ZonMw.  
43  
44  
45  
46  
47

### 48 49 **Competing interests statement**

50 All authors have completed the ICMJE uniform disclosure form at  
51 [www.icmje.org/coi\\_disclosure.pdf](http://www.icmje.org/coi_disclosure.pdf). Dr. Anema reports a chair in Insurance Medicine paid by  
52 the Dutch Social Security Agency, and he is stockholder of Evalua LTD. Dr. Huirne reports  
53 grants from Samsung, grants from Gideon Richter, grants from Celonova, outside the  
54 submitted work. Dr. Brölmann reports grants from Olympus, personal fees from Nordic  
55 Farma, during the conduct of the study . Dr. Anema and dr. Huirne are currently setting up a  
56  
57  
58  
59  
60

1  
2  
3 spin-off company concerning the implementation of a mobile application concerning the  
4 IKHERSTEL intervention in the Netherlands. The remaining authors have nothing to  
5 disclose.  
6  
7  
8

### 9 10 **Ethics approval**

11 The study protocol was approved by the Institutional Review Board of the VU University  
12 Medical Centre (16 May 2011, no. 2011/142) and by the medical ethics committees of all  
13 other participating Onze Lieve Vrouwe Gasthuis Oost (Amsterdam), Meander Medical Center  
14 (Amersfoort), Amstelland Hospital (Amsterdam), Medical Center Alkmaar (Alkmaar),  
15 Diakonessenhuis (Utrecht), Spaarne Gasthuis (locations Haarlem and Hoofddorp), and Flevo  
16 Hospital (Almere). Informed consent was obtained from all participants.  
17  
18  
19  
20  
21

### 22 23 **Data sharing**

24 No additional data are available, though details on statistical analyses are available from the  
25 corresponding author on request.  
26  
27  
28

### 29 30 **References**

- 31 1. Cox H. Recovery from gynaecological day surgery: are we underestimating the  
32 process. *Journal of Ambulatory Surgery*. 2003;10:114-21.
- 33 2. Horvath KJ. Postoperative recovery at home after ambulatory gynecologic  
34 laparoscopic surgery. *J Perianesth Nurs*. 2003;18(5):324-34.
- 35 3. Gilmartin J. Contemporary day surgery: patients' experience of discharge and  
36 recovery. *J Clin Nurs*. 2007;16(6):1109-17.
- 37 4. Evenson M, Payne D, Nygaard I. Recovery at home after major gynecologic surgery:  
38 how do our patients fare? *Obstet Gynecol*. 2012;119(4):780-4.
- 39 5. Kehlet H, Wilmore DW. Multimodal strategies to improve surgical outcome. *Am J*  
40 *Surg*. 2002;183(6):630-41.
- 41 6. Kjolhede P, Borendal Wodlin N, Nilsson L, Fredrikson M, Wijma K. Impact of stress  
42 coping capacity on recovery from abdominal hysterectomy in a fast-track programme:  
43 a prospective longitudinal study. *BJOG*. 2012;119(8):998-1006.
- 44 7. Wodlin NB, Nilsson L. The development of fast-track principles in gynecological  
45 surgery. *Acta Obstet Gynecol Scand*. 2013;92(1):17-27.
- 46 8. Naidu M, Sultan AH, Thakar R. Convalescence advice following gynaecological  
47 surgery. *J Obstet Gynaecol*. 2012;32(6):556-9.  
48  
49  
50  
51  
52  
53  
54  
55  
56  
57  
58  
59  
60

- 1  
2  
3 9. Bouwsma EVA, Anema JR, Vonk Noordegraaf A, Knol DL, Bosmans JE, Schraffordt  
4 Koops SE, et al. The cost effectiveness of a tailored, web-based care program to  
5 enhance postoperative recovery in gynecologic patients in comparison with usual care:  
6 protocol of a stepped wedge cluster randomized controlled trial. *JMIR Res Protoc*.  
7 2014;3(2):e30.
- 8  
9  
10  
11 10. Vonk Noordegraaf A, Huirne JAF, Brolmann HAM, Van Mechelen W, Anema JR.  
12 Multidisciplinary convalescence recommendations after gynaecological surgery: a  
13 modified Delphi method among experts. *BJOG*. 2011;118(13):1557-67.
- 14  
15  
16 11. Vonk Noordegraaf A, Huirne JAF, Pittens CA, van Mechelen W, Broerse JEW,  
17 Brolmann HAM, et al. eHealth Program to Empower Patients in Returning to Normal  
18 Activities and Work After Gynecological Surgery: Intervention Mapping as a Useful  
19 Method for Development. *J Med Internet Res*. 2012;14(5):e124.
- 20  
21  
22 12. de Vet HCW, Heymans MW, Dunn KM, Pope DP, van der Beek AJ, Macfarlane GJ,  
23 et al. Episodes of low back pain: a proposal for uniform definitions to be used in  
24 research. *Spine (Phila Pa 1976)*. 2002;27(21):2409-16.
- 25  
26  
27 13. Dolan P. Modeling valuations for EuroQol health states. *Med Care*. 1997;35(11):1095-  
28 108.
- 29  
30  
31 14. Lamers LM, Stalmeier PF, McDonnell J, Krabbe PF, van Busschbach JJ. [Measuring  
32 the quality of life in economic evaluations: the Dutch EQ-5D tariff]. *Ned Tijdschr*  
33 *Geneesk*. 2005;149(28):1574-8.
- 34  
35  
36 15. Aaronson NK, Muller M, Cohen PD, Essink-Bot ML, Fekkes M, Sanderman R, et al.  
37 Translation, validation, and norming of the Dutch language version of the SF-36  
38 Health Survey in community and chronic disease populations. *J Clin Epidemiol*.  
39 1998;51(11):1055-68.
- 40  
41  
42 16. Kluivers KB, Hendriks JCM, Mol BWJ, Bongers MY, Vierhout ME, Brolmann HAM,  
43 et al. Clinimetric properties of 3 instruments measuring postoperative recovery in a  
44 gynecologic surgical population. *Surgery*. 2008;144(1):12-21.
- 45  
46  
47 17. Frick KD. Microcosting quantity data collection methods. *Med Care*. 2009;47(7 Suppl  
48 1):S76-S81.
- 49  
50  
51 18. Hakkaart-van Roijen L, Tan S, Bouwmans C. Handleiding Voor Kostenonderzoek.  
52 *Methoden en Standaardkostprijzen Voor Economische Evaluaties in de*  
53 *Gezondheidszorg*. 2010.
- 54  
55  
56 19. Z-index. G-Standaard. Z-index [Internet]. 2014. Available from:  
57 <http://www.webcitation.org/6NnSqBHJW>.
- 58  
59  
60

- 1
  - 2
  - 3
  - 4
  - 5
  - 6
  - 7
  - 8
  - 9
  - 10
  - 11
  - 12
  - 13
  - 14
  - 15
  - 16
  - 17
  - 18
  - 19
  - 20
  - 21
  - 22
  - 23
  - 24
  - 25
  - 26
  - 27
  - 28
  - 29
  - 30
  - 31
  - 32
  - 33
  - 34
  - 35
  - 36
  - 37
  - 38
  - 39
  - 40
  - 41
  - 42
  - 43
  - 44
  - 45
  - 46
  - 47
  - 48
  - 49
  - 50
  - 51
  - 52
  - 53
  - 54
  - 55
  - 56
  - 57
  - 58
  - 59
  - 60
20. Koopmanschap MA. PRODISQ: a modular questionnaire on productivity and disease for economic evaluation studies. *Expert Rev Pharmacoecon Outcomes Res.* 2005;5(1):23-8.
21. Drummond MF, Sculpher MJ, Torrance GW, O'Brien BJ, Stoddart GL. *Methods for the Economic Evaluation of Health Care Programmes.* 3 ed. New York: Oxford University Press; 2005.
22. White IR, Royston P, Wood AM. Multiple imputation using chained equations: Issues and guidance for practice. *Stat Med.* 2011;30(4):377-99.
23. Rubin DB. *Multiple Imputation for Nonresponse in Surveys.* New York, NY: John Wiley & Sons; 1987.
24. Efron B. Missing Data, Imputation, and the Bootstrap. *Journal of the American Statistical Association.* 2012;89(426):463-75.
25. van der Leeden R. Resampling multilevel models. *Handbook of Multilevel Analysis:* Springer Science, editors; 2008.
26. Petrou S, Gray A. Economic evaluation alongside randomised controlled trials: design, conduct, analysis, and reporting. *BMJ.* 2011;342:d1548.
27. Bailey J, Roland M, Roberts C. Is follow up by specialists routinely needed after elective surgery? A controlled trial. *J Epidemiol Community Health.* 1999;53(2):118-24.
28. Easton K, Read MD, Woodman NM. Influence of early discharge after hysterectomy on patient outcome and GP workloads. *J Obstet Gynaecol.* 2003;23(3):271-5.
29. Burton A, Billingham LJ, Bryan S. Cost-effectiveness in clinical trials: using multiple imputation to deal with incomplete cost data. *Clin Trials.* 2007;4(2):154-61.
30. MacNeil VJ, Eekhout I, Dijkgraaf MG, van HH, de Rooij SE, Heymans MW, et al. Multiple imputation strategies for zero-inflated cost data in economic evaluations: which method works best? *Eur J Health Econ.* 2016;17(8):939-50.
31. Briggs A, Clark T, Wolstenholme J, Clarke P. Missing... presumed at random: cost-analysis of incomplete data. *Health Econ.* 2003;12(5):377-92.
32. Roumm AR, Pizzi L, Goldfarb NI, Cohn H. Minimally invasive: minimally reimbursed? An examination of six laparoscopic surgical procedures. *Surg Innov.* 2005;12(3):261-87.
33. Aarts JW, Nieboer TE, Johnson N, Tavender E, Garry R, Mol BW, et al. Surgical approach to hysterectomy for benign gynaecological disease. *Cochrane Database Syst Rev.* 2015(8):CD003677.

- 1  
2  
3 34. Tate DF, Finkelstein EA, Khavjou O, Gustafson A. Cost effectiveness of internet  
4 interventions: review and recommendations. *Ann Behav Med.* 2009;38(1):40-5.  
5  
6 35. van der Meij E, Anema JR, Otten RH, Huirne JA, Schaafsma FG. The Effect of  
7 Perioperative E-Health Interventions on the Postoperative Course: A Systematic  
8 Review of Randomised and Non-Randomised Controlled Trials. *PLoS One.*  
9  
10 2016;11(7):e0158612.  
11  
12  
13  
14  
15  
16  
17  
18  
19  
20  
21  
22  
23  
24  
25  
26  
27  
28  
29  
30  
31  
32  
33  
34  
35  
36  
37  
38  
39  
40  
41  
42  
43  
44  
45  
46  
47  
48  
49  
50  
51  
52  
53  
54  
55  
56  
57  
58  
59  
60

Figure 1 Trial profile

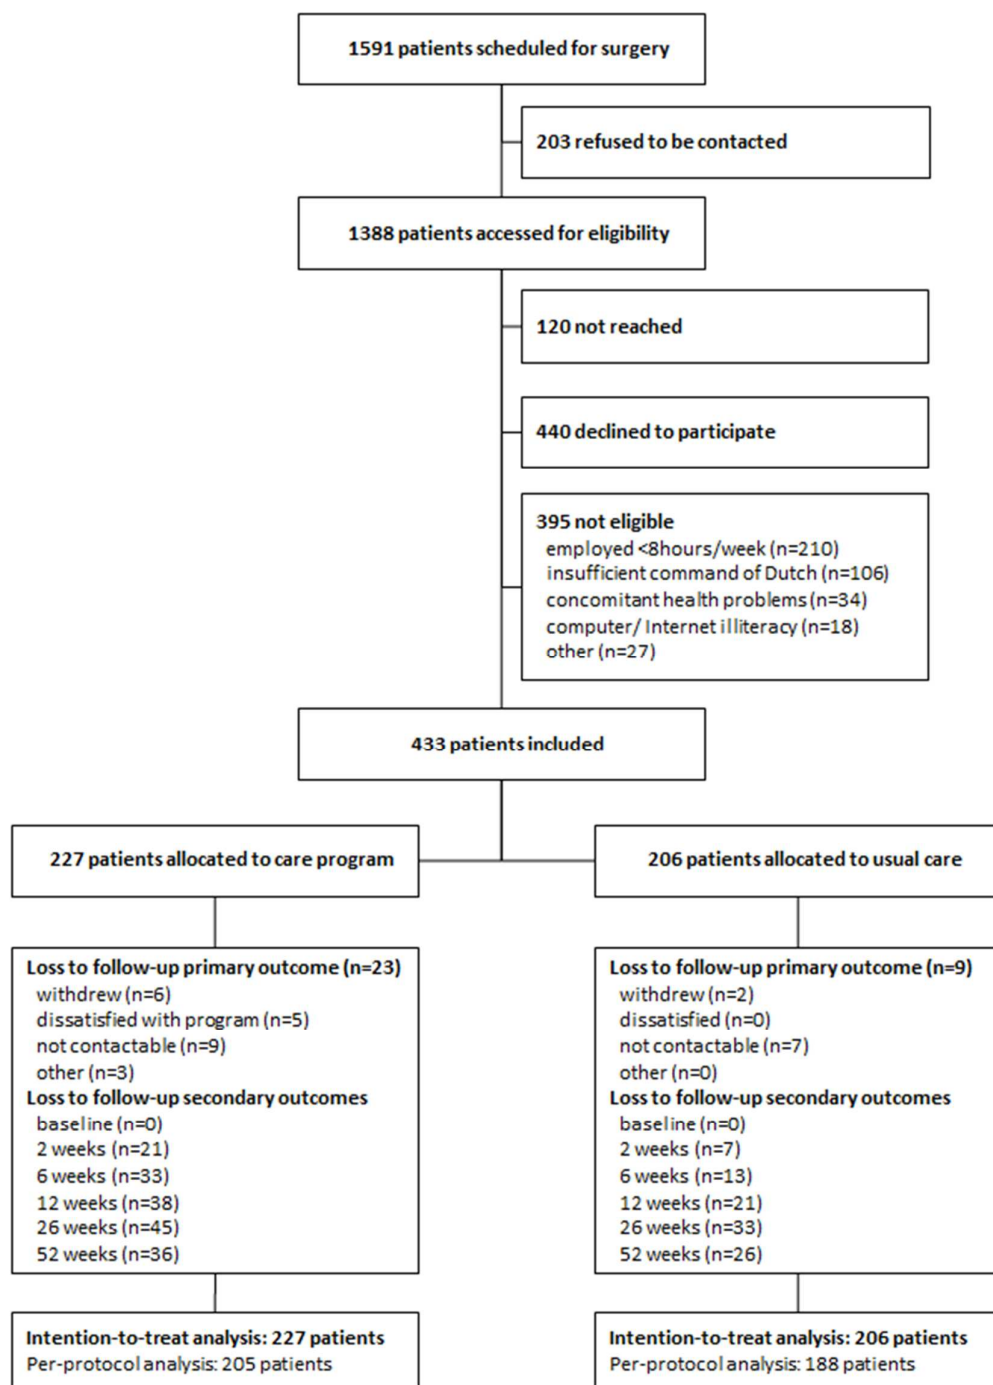



**Figure 2** Cost-effectiveness planes and cost-effectiveness acceptability curves for RTW and QALYs

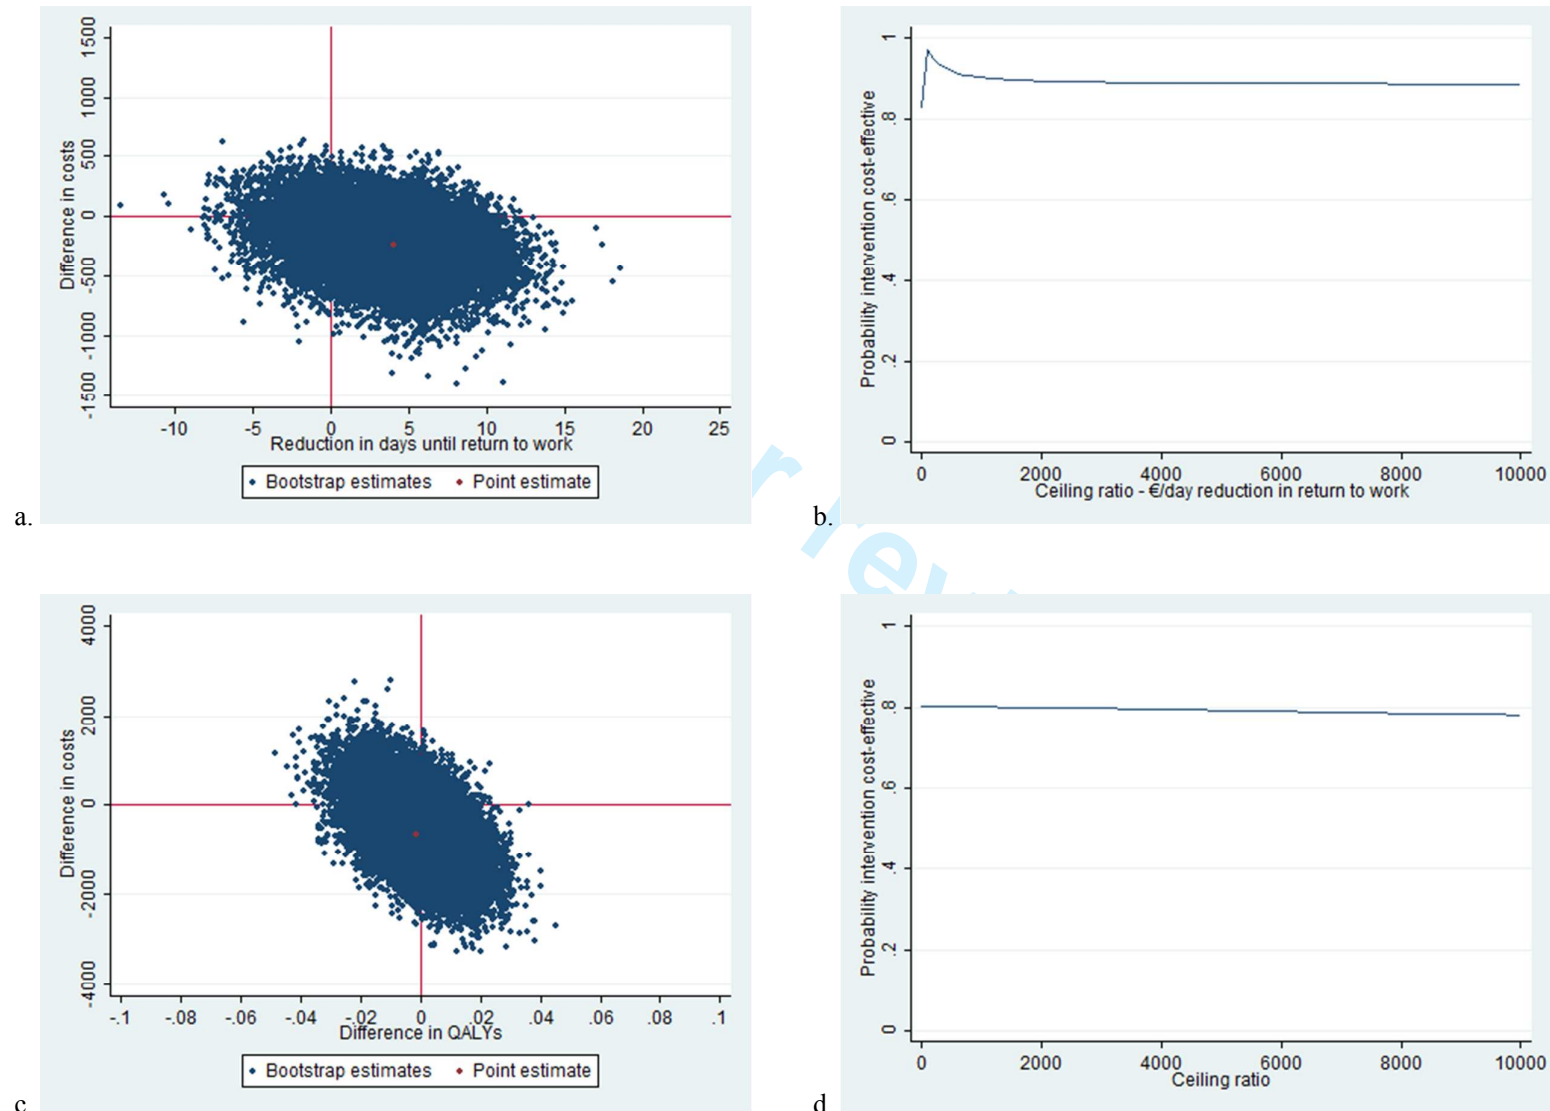

The cost-effectiveness planes (a,c) indicate the uncertainty around the incremental cost-effectiveness ratio.

The cost-effectiveness acceptability curves (b,d) indicate the probability of cost-effectiveness for different values (€) of willingness to pay per unit of effect gained.

RTW, return to work; QALY, Quality Adjusted Life Year.



**Table 1** Baseline characteristics of individual patients

|                                                                                                                                                                                               | Care Programme<br>(n=227) | Usual Care<br>(n=206) |
|-----------------------------------------------------------------------------------------------------------------------------------------------------------------------------------------------|---------------------------|-----------------------|
| <b>Patient characteristics</b>                                                                                                                                                                |                           |                       |
| Age (years $\pm$ SD)                                                                                                                                                                          | 46.1 $\pm$ 7.3            | 45.6 $\pm$ 6.7        |
| Dutch nationality                                                                                                                                                                             | 220 (96.9%)               | 202 (98.1%)           |
| Internet use (days/week)                                                                                                                                                                      |                           |                       |
| < 1                                                                                                                                                                                           | 2 (0.9%)                  | 3 (1.5%)              |
| 1 – 2                                                                                                                                                                                         | 9 (4.0%)                  | 10 (4.9%)             |
| 3 – 5                                                                                                                                                                                         | 45 (19.8%)                | 42 (20.4%)            |
| > 5                                                                                                                                                                                           | 171 (75.3%)               | 151 (73.3%)           |
| Education level *                                                                                                                                                                             |                           |                       |
| Low                                                                                                                                                                                           | 25 (11.0%)                | 17 (8.3%)             |
| Intermediate                                                                                                                                                                                  | 88 (38.8%)                | 100 (48.5%)           |
| High                                                                                                                                                                                          | 114 (50.2%)               | 89 (43.2%)            |
| <b>Surgery-related characteristics</b>                                                                                                                                                        |                           |                       |
| Type of surgery                                                                                                                                                                               |                           |                       |
| Adnexal surgery                                                                                                                                                                               | 74 (32.6%)                | 51 (24.8%)            |
| Laparoscopic hysterectomy                                                                                                                                                                     | 65 (28.6%)                | 50 (24.3%)            |
| Vaginal hysterectomy                                                                                                                                                                          | 36 (15.9%)                | 53 (25.7%)            |
| Abdominal hysterectomy                                                                                                                                                                        | 52 (22.9%)                | 52 (25.2%)            |
| <b>Health-related characteristics</b>                                                                                                                                                         |                           |                       |
| Perceived health status (mean $\pm$ SD)                                                                                                                                                       | 75.8 $\pm$ 16.5           | 76.9 $\pm$ 16.7       |
| <b>Work-related characteristics</b>                                                                                                                                                           |                           |                       |
| Type of work                                                                                                                                                                                  |                           |                       |
| Salary employed                                                                                                                                                                               | 194 (85.5%)               | 175 (85.0%)           |
| Self-employed                                                                                                                                                                                 | 28 (12.3%)                | 28 (13.6%)            |
| Voluntary work                                                                                                                                                                                | 5 (2.2%)                  | 3 (1.5%)              |
| Work hours per week (mean $\pm$ SD)                                                                                                                                                           | 29.7 $\pm$ 9.3            | 28.7 $\pm$ 8.2        |
| Sick leave (3 months before surgery)                                                                                                                                                          |                           |                       |
| Absence from work <sup>§</sup>                                                                                                                                                                | 88 (38.8%)                | 66 (32.0%)            |
| Number of sick leave days (median (IQR))                                                                                                                                                      | 4.0 (2-10)                | 4.5 (2-11)            |
| RTW expectation (long) <sup>†</sup>                                                                                                                                                           | 42 (18.5%)                | 38 (18.4%)            |
| RTW intention (low) <sup>‡</sup>                                                                                                                                                              | 45 (19.8%)                | 67 (32.5%)            |
| Data are number of patients (%), unless otherwise indicated.                                                                                                                                  |                           |                       |
| * Low=preschool, primary school; intermediate=secondary school; high=tertiary school, university, or postgraduate.                                                                            |                           |                       |
| <sup>§</sup> Defined as at least 1 day absence.                                                                                                                                               |                           |                       |
| <sup>†</sup> Defined as expectation longer than 3 weeks for adnexal surgery, longer than 6 weeks for laparoscopic or vaginal hysterectomy, or longer than 8 weeks for abdominal hysterectomy. |                           |                       |
| <sup>‡</sup> Defined as score 4 or 5 (range 1-5).                                                                                                                                             |                           |                       |
| RTW, return to work.                                                                                                                                                                          |                           |                       |

**Table 2** Costs associated with self-reported service used across treatment groups at 12 months follow-up

| <b>Cost category</b>                  | <b>Intervention<br/>mean<br/>(SEM)<br/>n=227</b> | <b>Usual care<br/>mean<br/>(SEM)<br/>n=206</b> | <b>Mean cost<br/>difference<br/>(95% CI)*</b> |
|---------------------------------------|--------------------------------------------------|------------------------------------------------|-----------------------------------------------|
| <b>Healthcare costs</b>               | <b>3823 (99)</b>                                 | <b>4142 (134)</b>                              | <b>-61 (-361 to 218)</b>                      |
| Surgery costs                         | 3236 (64)                                        | 3413 (58)                                      | 34 (-118 to 174)                              |
| Primary care costs                    | 179 (24)                                         | 167 (30)                                       | 14 (-58 to 95)                                |
| Secondary care costs                  | 242 (42)                                         | 458 (98)                                       | -178 (-400 to -31)                            |
| Costs of medication and aids          | 13 (4)                                           | 10 (4)                                         | 3 (-6 to 11)                                  |
| Home help costs                       | 72 (24)                                          | 94 (26)                                        | -19 (-85 to 45)                               |
| Intervention                          | 80 (0)                                           | NA                                             | 80 (NA)                                       |
| <b>Lost productivity costs</b>        | <b>8443 (543)</b>                                | <b>9653 (528)</b>                              | <b>-570 (-1909 to 692)</b>                    |
| Costs of absenteeism from unpaid work | 1845 (224)                                       | 2124 (299)                                     | -144 (-756 to 282)                            |
| Costs of absenteeism from paid work   | 6499 (425)                                       | 7281 (344)                                     | -424 (-1469 to 578)                           |
| Presenteeism costs                    | 99 (78)                                          | 248 (127)                                      | -154 (-458 to 82)                             |
| <b>Total societal costs</b>           | <b>12266 (596)</b>                               | <b>13795 (602)</b>                             | <b>-647 (-2116 to 735)</b>                    |

Costs are expressed in 2014 Euros (€1.00 = £0.85; \$1.06).  
Mean values summarize the costs derived after the imputation process.  
\* Uncertainty estimated using bootstrapping and corrected for clustering by hospital and type of surgery  
SEM, standard error; CI, confidence interval; NA, not applicable.

**Table 3** Effects across treatment groups at 12 months follow-up

| <b>Outcomes</b>           | <b>Intervention<br/>Mean (SEM)<br/>n=227</b> | <b>Usual care<br/>Mean (SEM)<br/>n=206</b> | <b>Mean effect difference<br/>(95% CI) *</b> |
|---------------------------|----------------------------------------------|--------------------------------------------|----------------------------------------------|
| Duration until RTW (days) | 49.6 (2.7)                                   | 56.2 (2.2)                                 | -4.1 (-10.8 to 2.6)                          |
| QALY's gained             | 0.96 (0.008)                                 | 0.96 (0.007)                               | -0.001 (-0.023 to 0.020)                     |
| HR-QoL (SF-36)            |                                              |                                            |                                              |
| PCS                       | 5.7 <sup>§</sup> (0.7)                       | 6.7 <sup>§</sup> (0.6)                     | -0.7 (-2.6 to 1.1)                           |
| MCS                       | 3.3 <sup>§</sup> (0.7)                       | 3.7 <sup>§</sup> (0.8)                     | -0.4 (-2.5 to 1.7)                           |
| Recovery (RI-10)          | 24.3 <sup>§</sup> (0.4)                      | 25.0 <sup>§</sup> (0.5)                    | -0.6 (-2.0 to 0.9)                           |

\* Uncertainty estimated using bootstrapping and corrected for clustering by hospital and type of surgery.

<sup>§</sup> Difference between baseline score and score at 12 months follow-up.

SEM, standard error; CI, confidence interval; RTW, return to work; QALY, Quality Adjusted Life Year; HR-QoL, health-related quality of life; SF, Short Form; PSC, physical component scale; MSC, mental component scale; RI, recovery index.

**Table 4** Differences in pooled means costs and effects, incremental cost-effectiveness ratios and the distribution of incremental cost-effectiveness pairs around the quadrants of the cost-effectiveness planes (main analysis)

| Outcome          | $\Delta$ Cost* (€)  | $\Delta$ Effect* (days)         | ICER<br>€/day | Distribution CE-plane |                 |                 |                 |
|------------------|---------------------|---------------------------------|---------------|-----------------------|-----------------|-----------------|-----------------|
|                  | mean (95% CI)       | mean (95% CI)                   |               | NE <sup>1</sup>       | SE <sup>2</sup> | SW <sup>3</sup> | NW <sup>4</sup> |
| RTW              | -228 (-708 to 136)  | 4.1 <sup>§</sup> (-2.6 to 10.8) | -56           | 15%                   | 69%             | 10%             | 6%              |
| QALY's gained    | -647 (-2116 to 735) | -0.001 (-0.023 to 0.020)        | 501187        | 4%                    | 42%             | 35%             | 19%             |
| HR-QoL (SF36)    |                     |                                 |               |                       |                 |                 |                 |
| PCS              | -647 (-2116 to 735) | -0.7 (-2.6 to 1.1)              | 870           | 6%                    | 19%             | 58%             | 17%             |
| MCS              | -647 (-2116 to 735) | -0.4 (-2.5 to 1.7)              | 1573          | 10%                   | 33%             | 44%             | 13%             |
| Recovery (RI-10) | -647 (-2116 to 735) | -0.6 (-2.0 to 0.9)              | 1127          | 5%                    | 22%             | 55%             | 18%             |

\* uncertainty estimated using bootstrapping and corrected for clustering by hospital and type of surgery

<sup>§</sup> Note that a positive value indicates faster RTW in the intervention group compared to the control group.

<sup>1</sup> Refers to the northeast quadrant of the CE-plane, indicating that the intervention care programme is more effective and more costly than usual care.

<sup>2</sup> Refers to the southeast quadrant of the CE-plane, indicating that the intervention care programme is more effective and less costly than usual care.

<sup>3</sup> Refers to the southwest quadrant of the CE-plane, indicating that the intervention care programme is less effective and less costly than usual care.

<sup>4</sup> Refers to the northeast quadrant of the CE-plane, indicating that the intervention care programme is less effective and more costly than usual care.

ICER, Incremental Cost-Effectiveness Ratio; CE plane, cost-effectiveness plane; RTW, return to work; QALY, Quality Adjusted Life Year; HR-QoL, health-related quality of life; SF, Short Form; PSC, physical component scale; MSC, mental component scale; RI, recovery index.

**Table 5** Results from the per-protocol and sensitivity analyses (Return to Work)

| Analysis               | Sample size |     | $\Delta$ Cost* (€)<br>mean (95% CI) | $\Delta$ Effect* (days)<br>mean (95% CI) | ICER<br>€/day | Distribution CE-plane |                 |                 |                 |
|------------------------|-------------|-----|-------------------------------------|------------------------------------------|---------------|-----------------------|-----------------|-----------------|-----------------|
|                        | IC          | UC  |                                     |                                          |               | NE <sup>1</sup>       | SE <sup>2</sup> | SW <sup>3</sup> | NW <sup>4</sup> |
| Per-protocol analysis  | 205         | 188 | -359 (-866 to -11)                  | 6.4 <sup>§</sup> (-0.2 to 12.9)          | -56           | 8%                    | 87%             | 5%              | 1%              |
| Complete-case analysis | 154         | 150 | -45 (-466 to 362)                   | 11.6 <sup>§</sup> (-5.4 to 19.3)         | -4            | 45%                   | 55%             | 0%              | 0%              |
| Friction cost approach | 227         | 206 | -228 (-708 to 136)                  | 4.1 <sup>§</sup> (-2.6 to 10.8)          | -56           | 15%                   | 69%             | 10%             | 6%              |
| Healthcare perspective | 227         | 206 | -61 (-361 to 218)                   | 4.1 <sup>§</sup> (-2.6 to 10.8)          | -15           | 28%                   | 56%             | 5%              | 10%             |

\* uncertainty estimated using bootstrapping and corrected for clustering by hospital and type of surgery

<sup>§</sup> Note that a positive value indicates faster RTW in the intervention group compared to the control group.

<sup>1</sup> Refers to the northeast quadrant of the CE-plane, indicating that the intervention care programme is more effective and more costly than usual care.

<sup>2</sup> Refers to the southeast quadrant of the CE-plane, indicating that the intervention care programme is more effective and less costly than usual care.

<sup>3</sup> Refers to the southwest quadrant of the CE-plane, indicating that the intervention care programme is less effective and less costly than usual care.

<sup>4</sup> Refers to the northwest quadrant of the CE-plane, indicating that the intervention care programme is less effective and more costly than usual care.

IC, intervention care; UC, usual care; ICER, Incremental Cost-Effectiveness Ratio; CE plane, cost-effectiveness plane.

**Supplementary table S1** Costs of the intervention care programme from the societal perspective, valued using a bottom-up micro-costing approach

| Intervention component             | Cost category | Staff                   | Units      | Unit Price | Total costs (n=227) | Costs per patient |
|------------------------------------|---------------|-------------------------|------------|------------|---------------------|-------------------|
| <b>Implementation costs</b>        |               |                         |            |            |                     |                   |
| Training sessions (care-managers)  | labour costs  | principal investigator  | 5 hours    | € 36.94    | € 184.69            | € 0.81            |
|                                    | labour costs  | occupational physicians | 18 hours   | € 89.68    | € 1,614.24          | € 7.11            |
|                                    | labour costs  | occupational therapist  | 2 hours    | € 46.32    | € 92.64             | € 0.41            |
|                                    | capital costs |                         | 5 hours    | € 6.26     | € 31.29             | € 0.14            |
| Training sessions (hospital staff) | labour costs  | principal investigator  | 38 hours   | € 36.94    | € 1,403.67          | € 6.18            |
|                                    | travel costs  | principal investigator  | 582 km     | € 0.22     | € 127.28            | € 0.56            |
|                                    | labour costs  | gynaecologists          | 18.9 hours | € 107.30   | € 2,027.90          | € 8.93            |
|                                    | labour costs  | residents               | 18.9 hours | € 42.58    | € 804.82            | € 3.55            |
|                                    | labour costs  | nurses                  | 45 hours   | € 42.64    | € 1,918.58          | € 8.45            |
|                                    | capital costs | printed materials       | 9 hours    | € 6.26     | € 56.33             | € 0.25            |
|                                    |               |                         |            |            | € 821.00            | € 3.62            |
|                                    |               |                         |            |            | <b>Subtotal</b>     | <b>€ 40.01</b>    |
| <b>eHealth intervention</b>        |               |                         |            |            |                     |                   |
| Electronic approval                | labour costs  | gynaecologists          | 14.2 hours | € 107.30   | € 1,523.60          | € 6.71            |
|                                    | capital costs |                         | 14.2 hours | € 4.17     | € 59.15             | € 0.26            |
| Maintenance                        | labour costs  | computer specialist     | 12.2 hours | € 37.82    | € 461.45            | € 2.03            |
|                                    | capital costs |                         | 12.2 hours | € 1.67     | € 20.33             | € 0.09            |
| Administrator time                 | labour costs  | research assistant      | 37.8 hours | € 33.42    | € 1,263.23          | € 5.56            |
|                                    | capital costs |                         | 37.8 hours | € 4.17     | € 157.46            | € 0.69            |
| Website hosting                    | other         |                         | 40 months  | € 18.84    | € 578.88            | € 2.55            |
|                                    |               |                         |            |            | <b>Subtotal</b>     | <b>€ 17.90</b>    |
| <b>Occupational intervention</b>   |               |                         |            |            |                     |                   |
| Pre-operative consultations        | labour costs  | occupational physicians | 7.9 hours  | € 89.68    | € 708.47            | € 3.12            |

|                                 |               |                         |              |         |                 |                     |
|---------------------------------|---------------|-------------------------|--------------|---------|-----------------|---------------------|
|                                 | capital costs |                         | 7.9 hours    | € 4.17  | € 32.91         | € 0.14              |
|                                 | phone costs   |                         | 413 minutes  | € 0.09  | € 38.71         | € 0.17              |
| Post-operative consultations    | labour costs  | occupational physicians | 37.5 hours   | € 89.68 | € 3.363.00      | € 14.81             |
|                                 | capital costs |                         | 37.5 hours   | € 4.17  | € 156.21        | € 0.69              |
|                                 | phone costs   |                         | 2083 minutes | € 0.09  | € 195.23        | € 0.86              |
| Workplace intervention          | labour costs  | occupational therapist  | 4 hours      | € 46.32 | € 185.29        | € 0.82              |
|                                 | capital costs |                         | 3 hours      | € 6.26  | € 18.78         | € 0.08              |
|                                 | labour costs  | employer                | 2 hours      | € 83.69 | € 167.37        | € 0.74              |
|                                 | travel costs  | occupational therapist  | 110 km       | € 0.22  | € 24.06         | € 0.11              |
|                                 |               |                         |              |         | <b>Subtotal</b> | <b>€ 21.54</b>      |
| <b>Developmental costs</b>      |               |                         |              |         | € 33,873.55     | € 0.56 <sup>§</sup> |
|                                 |               |                         |              |         | <b>Subtotal</b> | <b>€ 0.56</b>       |
| <b>TOTAL intervention costs</b> |               |                         |              |         |                 | <b>€ 80.02</b>      |

Costs are expressed in 2014 Euros (€1.00 = £0.85; \$1.06).

<sup>§</sup> € 33,873.55 was paid for the development of the intervention care-programme. For calculating the development costs per participant, these were divided by the expected number of users during the first five years after implementation (60,200). Per year 20,000 gynaecologic surgeries (LAS, TLH, VH, AH) are being performed in the Netherlands and based on the outcomes of an earlier performed process-evaluation we hypothesized a reach of 60.2%.<sup>42</sup>

**Supplementary table S2** Differences in pooled means costs and effects, incremental cost-effectiveness ratios and the distribution of incremental cost-effectiveness pairs around the quadrants of the cost-effectiveness plane

| Analysis                              | Sample size |     | $\Delta$ Cost* (€)<br>mean (95% CI) | $\Delta$ Effect* (days)<br>mean (95% CI) | ICER<br>€/day | Distribution CE-plane |                 |                 |                 |
|---------------------------------------|-------------|-----|-------------------------------------|------------------------------------------|---------------|-----------------------|-----------------|-----------------|-----------------|
|                                       | IC          | UC  |                                     |                                          |               | NE <sup>1</sup>       | SE <sup>2</sup> | SW <sup>3</sup> | NW <sup>4</sup> |
| <b>QALYs</b>                          |             |     |                                     |                                          |               |                       |                 |                 |                 |
| Intention to treat                    | 227         | 206 | -647 (-2116 to 735)                 | -0.001 (-0.023 to 0.020)                 | 501187        | 4%                    | 42%             | 35%             | 19%             |
| Per-protocol analysis                 | 205         | 188 | -1148 (-2611 to 162)                | 0.003 (-0.019 to 0.024)                  | -432881       | 1%                    | 59%             | 34%             | 6%              |
| Complete-case analysis                | 132         | 136 | -1607 (-3421 to 52)                 | 0.009 (-0.013 to 0.033)                  | -202816       | 1%                    | 72%             | 24%             | 3%              |
| Friction cost approach                | 227         | 206 | -825 (-2209 to 470)                 | -0.001 (-0.023 to 0.020)                 | 639131        | 2%                    | 44%             | 42%             | 12%             |
| Healthcare perspective                | 227         | 206 | -61 (-361 to 218)                   | -0.001 (-0.023 to 0.020)                 | 46942         | 13%                   | 33%             | 28%             | 26%             |
| <b>SF-36 PHYSICAL COMPONENT SCORE</b> |             |     |                                     |                                          |               |                       |                 |                 |                 |
| Intention to treat                    | 227         | 206 | -647 (-2116 to 735)                 | -0.7 (-2.6 to 1.1)                       | 870           | 6%                    | 19%             | 58%             | 17%             |
| Per-protocol analysis                 | 205         | 188 | -1148 (-2611 to 162)                | -0.9 (-2.8 to 1.1)                       | 1350          | 2%                    | 21%             | 71%             | 6%              |
| Complete-case analysis                | 153         | 149 | -1689 (-3316 to -231)               | -1.2 (-3.3 to 0.8)                       | 1389          | 0%                    | 12%             | 86%             | 2%              |
| Friction cost approach                | 227         | 206 | -825 (-2209 to 470)                 | -0.7 (-2.6 to 1.1)                       | 1109          | 4%                    | 21%             | 64%             | 11%             |
| Healthcare perspective                | 227         | 206 | -61 (-361 to 218)                   | -0.7 (-2.6 to 1.1)                       | 81            | 8%                    | 17%             | 44%             | 31%             |
| <b>SF-36 MENTAL COMPONENT SCALE</b>   |             |     |                                     |                                          |               |                       |                 |                 |                 |
| Intention to treat                    | 227         | 206 | -647 (-2116 to 735)                 | -0.4 (-2.5 to 1.7)                       | 1573          | 10%                   | 33%             | 44%             | 13%             |
| Per-protocol analysis                 | 205         | 188 | -1148 (-2611 to 162)                | -0.5 (-2.7 to 1.7)                       | 2198          | 2%                    | 32%             | 61%             | 5%              |
| Complete-case analysis                | 153         | 149 | -1689 (-3316 to -231)               | -0.1 (-2.6 to 1.9)                       | 12598         | 1%                    | 49%             | 49%             | 1%              |
| Friction cost approach                | 227         | 206 | -825 (-2209 to 470)                 | -0.4 (-2.5 to 1.7)                       | 2006          | 6%                    | 37%             | 49%             | 8%              |
| Healthcare perspective                | 227         | 206 | -61 (-361 to 218)                   | -0.4 (-2.5 to 1.7)                       | 147           | 17%                   | 26%             | 35%             | 22%             |
| <b>RECOVERY INDEX</b>                 |             |     |                                     |                                          |               |                       |                 |                 |                 |
| Intention to treat                    | 227         | 206 | -647 (-2116 to 735)                 | -0.6 (-2.0 to 0.9)                       | 1127          | 5%                    | 22%             | 55%             | 18%             |
| Per-protocol analysis                 | 205         | 188 | -1148 (-2611 to 162)                | -0.7 (-2.1 to 0.8)                       | 1786          | 1%                    | 23%             | 70%             | 6%              |
| Complete-case analysis                | 153         | 149 | -1689 (-3316 to -231)               | -0.7 (-2.2 to 0.7)                       | 2562          | 1%                    | 20%             | 78%             | 1%              |
| Friction cost approach                | 227         | 206 | -825 (-2209 to 470)                 | -0.6 (-2.0 to 0.9)                       | 1437          | 3%                    | 24%             | 62%             | 12%             |
| Healthcare perspective                | 227         | 206 | -61 (-361 to 218)                   | -0.6 (-2.0 to 0.9)                       | 106           | 8%                    | 19%             | 42%             | 31%             |



1  
2  
3  
4  
5 \* uncertainty estimated using bootstrapping and corrected for clustering by hospital and type of surgery

6 <sup>1</sup> Refers to the northeast quadrant of the CE-plane, indicating that the intervention care programme is more effective and more costly  
7 than usual care.

8 <sup>2</sup> Refers to the southeast quadrant of the CE-plane, indicating that the intervention care programme is more effective and less costly  
9 than usual care.

10 <sup>3</sup> Refers to the southwest quadrant of the CE-plane, indicating that the intervention care programme is less effective and less costly  
11 than usual care.

12 <sup>4</sup> Refers to the northwest quadrant of the CE-plane, indicating that the intervention care programme is less effective and more costly  
13 than usual care.

14 IC, intervention care; UC, usual care; ICER, Incremental Cost-effectiveness Ratio; CE plane, cost-effectiveness plane.  
15  
16  
17  
18  
19  
20  
21  
22  
23  
24  
25  
26  
27  
28  
29  
30  
31  
32  
33  
34  
35  
36  
37  
38  
39  
40  
41  
42  
43  
44  
45  
46  
47  
48  
49

## CHEERS checklist

| Section/item                    | Item No | Recommendation                                                                                                                                                                             | Reported on page No/line No                                  |
|---------------------------------|---------|--------------------------------------------------------------------------------------------------------------------------------------------------------------------------------------------|--------------------------------------------------------------|
| <i>Title and abstract</i>       |         |                                                                                                                                                                                            |                                                              |
| Title                           | 1       | Identify the study as an economic evaluation or use more specific terms such as “cost-effectiveness analysis”, and describe the interventions compared.                                    | page 1, line 6.                                              |
| Abstract                        | 2       | Provide a structured summary of objectives, perspective, setting, methods (including study design and inputs), results (including base case and uncertainty analyses), and conclusions.    | page 2, line 3 to 28.                                        |
| <i>Introduction</i>             |         |                                                                                                                                                                                            |                                                              |
| Background and objectives       | 3       | Provide an explicit statement of the broader context for the study.<br>Present the study question and its relevance for health policy or practice decisions.                               | page 3, line 4 to 14;<br>page 3, line 14 to 22.              |
| <i>Methods</i>                  |         |                                                                                                                                                                                            |                                                              |
| Target population and subgroups | 4       | Describe characteristics of the base case population and subgroups analysed, including why they were chosen.                                                                               | page 5, line 4 to 9;<br>page 9, line 9 to 17.                |
| Setting and location            | 5       | State relevant aspects of the system(s) in which the decision(s) need(s) to be made.                                                                                                       | page 4, line 33 to page 5, line 2.                           |
| Study perspective               | 6       | Describe the perspective of the study and relate this to the costs being evaluated.                                                                                                        | page 4, line 26 to 28.                                       |
| Comparators                     | 7       | Describe the interventions or strategies being compared and state why they were chosen.                                                                                                    | page 5, line 21 to page 6, line 9;<br>page 6, line 11 to 18. |
| Time horizon                    | 8       | State the time horizon(s) over which costs and consequences are being evaluated and say why appropriate.                                                                                   | page 4, line 29 to 30;<br>page 8, line 12 to 13.             |
| Discount rate                   | 9       | Report the choice of discount rate(s) used for costs and outcomes and say why appropriate.                                                                                                 | page 8, line 12 to 13.                                       |
| Choice of health outcomes       | 10      | Describe what outcomes were used as the measure(s) of benefit in the evaluation and their relevance for the type of analysis performed.                                                    | page 6, line 21 to 33.                                       |
| Measurement of effectiveness    | 11a     | <i>Single study-based estimates:</i> Describe fully the design features of the single effectiveness study and why the single study was a sufficient source of clinical effectiveness data. | page 4, line 25 to 28;<br>page 5, line 22 to page 6, line 9. |

| Section/item                                           | Item No | Recommendation                                                                                                                                                                                                                                                                                                                                        | Reported on page No/line No                    |
|--------------------------------------------------------|---------|-------------------------------------------------------------------------------------------------------------------------------------------------------------------------------------------------------------------------------------------------------------------------------------------------------------------------------------------------------|------------------------------------------------|
| Measurement and valuation of preference based outcomes | 12      | If applicable, describe the population and methods used to elicit preferences for outcomes.                                                                                                                                                                                                                                                           | n/a                                            |
| Estimating costs and resources                         | 13a     | <i>Single study-based economic evaluation:</i> Describe approaches used to estimate resource use associated with the alternative interventions. Describe primary or secondary research methods for valuing each resource item in terms of its unit cost. Describe any adjustments made to approximate to opportunity costs.                           | page 7, line 1 to 24.                          |
| Currency, price date and conversion                    | 14      | Report the dates of the estimated resource quantities and unit costs. Describe methods for adjusting estimated unit costs to the year of reported costs if necessary. Describe methods for converting costs into a common currency base and the exchange rate.                                                                                        | page 8, line 12 to 13; table 2.                |
| Choice of model                                        | 15      | Describe and give reasons for the specific type of decision-analytical model used. Providing a figure to show model structure is strongly recommended.                                                                                                                                                                                                | Page 8, line 25 to 32.                         |
| Assumptions                                            | 16      | Describe all structural or other assumptions underpinning the decision-analytical model.                                                                                                                                                                                                                                                              | page 8, line 18 to 23.                         |
| Analytical methods                                     | 17      | Describe all analytical methods supporting the evaluation. This could include methods for dealing with skewed, missing, or censored data; extrapolation methods; methods for pooling data; approaches to validate or make adjustments (such as half cycle corrections) to a model; and methods for handling population heterogeneity and uncertainty. | page 8, line 18 to 23; page 9, line 1 to 7.    |
| <b>Results</b>                                         |         |                                                                                                                                                                                                                                                                                                                                                       |                                                |
| Study parameters                                       | 18      | Report the values, ranges, references, and, if used, probability distributions for all parameters. Report reasons or sources for distributions used to represent uncertainty where appropriate. Providing a table to show the input values is strongly recommended.                                                                                   | page 10, line 1 to 19; table 2 and 3; table S1 |
| Incremental costs and outcomes                         | 19      | For each intervention, report mean values for the main categories of estimated costs and outcomes of interest, as well as mean differences between the comparator groups. If applicable, report incremental cost-effectiveness ratios.                                                                                                                | page 10, line 22 to page 11, line 12; table 4; |
| Characterising uncertainty                             | 20a     | <i>Single study-based economic evaluation:</i> Describe the effects of sampling uncertainty for the estimated incremental cost and incremental effectiveness parameters, together with the impact of methodological assumptions (such as discount rate, study perspective).                                                                           | page 11, line 14 to 23.                        |

| Section/item                                                         | Item No | Recommendation                                                                                                                                                                                                                                                             | Reported on page No/line No                                   |
|----------------------------------------------------------------------|---------|----------------------------------------------------------------------------------------------------------------------------------------------------------------------------------------------------------------------------------------------------------------------------|---------------------------------------------------------------|
| Characterising heterogeneity                                         | 21      | If applicable, report differences in costs, outcomes, or cost-effectiveness that can be explained by variations between subgroups of patients with different baseline characteristics or other observed variability in effects that are not reducible by more information. | page 11, line 25 to page 12, line 12; page 13, line 19 to 27. |
| <i>Discussion</i>                                                    |         |                                                                                                                                                                                                                                                                            |                                                               |
| Study findings, limitations, generalisability, and current knowledge | 22      | Summarise key study findings and describe how they support the conclusions reached. Discuss limitations and the generalisability of the findings and how the findings fit with current knowledge.                                                                          | page 12, line 14 to page 14, line 21; page 15, line 20 to 30. |
| <i>Other</i>                                                         |         |                                                                                                                                                                                                                                                                            |                                                               |
| Source of funding                                                    | 23      | Describe how the study was funded and the role of the funder in the identification, design, conduct, and reporting of the analysis. Describe other non-monetary sources of support.                                                                                        | page 16, line 20 to 25.                                       |
| Conflicts of interest                                                | 24      | Describe any potential for conflict of interest of study contributors in accordance with journal policy. In the absence of a journal policy, we recommend authors comply with International Committee of Medical Journal Editors recommendations.                          | page 16, line 27 to page 17, line 2.                          |

# BMJ Open

## Cost-effectiveness of an Internet-based perioperative care programme to enhance postoperative recovery in gynaecological patients: economic evaluation alongside a stepped-wedge cluster-randomised trial

|                                 |                                                                                                                                                                                                                                                                                                                                                                                                                                                                                                                                                                                                                                                                                                                                                                                                                                             |
|---------------------------------|---------------------------------------------------------------------------------------------------------------------------------------------------------------------------------------------------------------------------------------------------------------------------------------------------------------------------------------------------------------------------------------------------------------------------------------------------------------------------------------------------------------------------------------------------------------------------------------------------------------------------------------------------------------------------------------------------------------------------------------------------------------------------------------------------------------------------------------------|
| Journal:                        | <i>BMJ Open</i>                                                                                                                                                                                                                                                                                                                                                                                                                                                                                                                                                                                                                                                                                                                                                                                                                             |
| Manuscript ID                   | bmjopen-2017-017782.R1                                                                                                                                                                                                                                                                                                                                                                                                                                                                                                                                                                                                                                                                                                                                                                                                                      |
| Article Type:                   | Research                                                                                                                                                                                                                                                                                                                                                                                                                                                                                                                                                                                                                                                                                                                                                                                                                                    |
| Date Submitted by the Author:   | 20-Sep-2017                                                                                                                                                                                                                                                                                                                                                                                                                                                                                                                                                                                                                                                                                                                                                                                                                                 |
| Complete List of Authors:       | Bouwsma, Esther; VU University Medical Center, Department of Obstetrics and Gynaecology; EMGO Institute for Health and Care Research<br>Bosmans, J; VU University Amsterdam, Department of Health Sciences, Faculty of Earth and Life Sciences; EMGO Institute for Health and Care Research<br>van Dongen, Johanna M.; VU University Amsterdam, Department of Health Sciences, Faculty of Earth and Life Sciences; EMGO Institute for Health and Care Research<br>Brölmann, Hans; VU University Medical Center, Department of Obstetrics and Gynaecology<br>Anema, Johannes; VU University Medical Center, Department of Public and Occupational Health; EMGO Institute for Health and Care Research<br>Huirne, Judith; VU University Medical Center, Department of Obstetrics and Gynaecology; EMGO Institute for Health and Care Research |
| <b>Primary Subject Heading</b>: | Obstetrics and gynaecology                                                                                                                                                                                                                                                                                                                                                                                                                                                                                                                                                                                                                                                                                                                                                                                                                  |
| Secondary Subject Heading:      | Health economics, Surgery                                                                                                                                                                                                                                                                                                                                                                                                                                                                                                                                                                                                                                                                                                                                                                                                                   |
| Keywords:                       | GYNAECOLOGY, Telemedicine < BIOTECHNOLOGY & BIOINFORMATICS, Minimally invasive surgery < GYNAECOLOGY, HEALTH ECONOMICS, Organisation of health services < HEALTH SERVICES ADMINISTRATION & MANAGEMENT, OCCUPATIONAL & INDUSTRIAL MEDICINE                                                                                                                                                                                                                                                                                                                                                                                                                                                                                                                                                                                                   |
|                                 |                                                                                                                                                                                                                                                                                                                                                                                                                                                                                                                                                                                                                                                                                                                                                                                                                                             |

SCHOLARONE™  
Manuscripts

1  
2  
3 **Title Page**  
4

5  
6 Full title:  
7

8 **Cost-effectiveness of an Internet-based perioperative care programme to enhance**  
9 **postoperative recovery in gynaecological patients: economic evaluation alongside a**  
10 **stepped-wedge cluster-randomised trial**  
11  
12

13  
14 Authors:  
15

16 Esther V A Bouwsma<sup>1,2,3</sup>, Judith E Bosmans<sup>3,4</sup>, Johanna M van Dongen<sup>3,4</sup>, Hans A M  
17 Brölmann<sup>1</sup>, Johannes R Anema<sup>2,3</sup>, Judith A F Huirne<sup>1,3</sup>  
18  
19

20  
21 Affiliations:  
22

- 23 1. Department of Obstetrics and Gynaecology, VU University Medical Center, Amsterdam,  
24 Netherlands  
25  
26 2. Department of Public and Occupational Health, VU University Medical Center,  
27 Amsterdam, Netherlands  
28  
29 3. EMGO Institute for Health and Care Research, Amsterdam, the Netherlands  
30  
31 4. Department of Health Sciences, Faculty of Earth and Life Sciences, VU University  
32 Amsterdam, Amsterdam, Netherlands  
33  
34  
35

36 Correspondence to:  
37

38 J.A.F. Huirne

39 [j.huirne@vumc.nl](mailto:j.huirne@vumc.nl)  
40  
41

42  
43 Corresponding author during the review process:  
44

45 E.V.A. Bouwsma

46 [ev.bouwsma@vumc.nl](mailto:ev.bouwsma@vumc.nl)  
47  
48  
49  
50  
51  
52  
53  
54  
55  
56  
57  
58  
59  
60

## **Abstract**

**Objectives** To evaluate the cost-effectiveness and cost-utility of an Internet-based perioperative care programme compared with usual care for gynaecological patients.

**Design** Economic evaluation from a societal perspective alongside a stepped-wedge cluster-randomised controlled trial with 12 months follow-up.

**Setting** Secondary care, nine hospitals in the Netherlands, 2011-2014.

**Participants** 433 employed women aged 18-65 scheduled for a hysterectomy and/or laparoscopic adnexal surgery.

**Intervention** The intervention comprised an Internet-based care programme aimed at improving convalescence and preventing delayed return to work following gynaecological surgery was sequentially rolled out. Depending on the implementation phase of their hospital, patients were allocated to usual care (n=206) or to the intervention (n=227).

**Main outcome measures** The primary outcome was duration until full sustainable return to work (RTW). Secondary outcomes were quality adjusted life years (QALYs), health-related quality of life and recovery.

**Results** At 12 months, there were no statistically significant differences in total societal costs (€-647; 95% CI €-2116 to €753) and duration until RTW (-4.1; 95% CI -10.8 to 2.6) between groups. The incremental cost-effectiveness ratio (ICER) for RTW was 56; each day earlier RTW in the intervention group was associated with cost savings of 56 euros compared to usual care. The probability of the intervention being cost-effective was 0.79 at a willingness-to-pay (WTP) of €0 per day earlier RTW, which increased to 0.97 at a WTP of €76 per day earlier RTW. The difference in QALYs gained over 12 months between the groups was clinically irrelevant resulting in a low probability of cost-effectiveness for QALYs.

**Conclusions** Considering that on average the costs of a day of sickness absence are €230, the care programme is considered cost-effective in comparison with usual care for duration until sustainable RTW after gynaecological surgery for benign disease. Future research should indicate whether widespread implementation of this care programme has the potential to reduce societal costs associated with gynaecological surgery.

**Trial registration** Netherlands National Trial Register NTR2933.

**Key words** gynaecology; Internet; telemedicine; self-management; convalescence; return to work; economic evaluation.

### **Strengths and limitations of this study**

- This is the first economic evaluation on an Internet-based care programme aimed at improving convalescence and preventing delayed return to work following gynaecological surgery.
- The study was conducted alongside a cluster-randomised controlled trial allowing prospective collection of relevant cost and effect data.
- The study was performed from a societal perspective and costs associated with lost productivity included both absenteeism as well as presenteeism costs.
- A latent barrier to future acceptance and implementation of the care programme lies in the fact that the costs and benefits of the care programme are separated between different types of stakeholders.



## **Main document**

### **Introduction**

At present, there is a transition of perioperative care from the hospital setting towards the home environment.<sup>1-4</sup> The introduction of advanced surgical techniques in combination with the implementation of “fast-track” clinical pathways have considerably reduced the length of postoperative hospital stays and many (complex) surgeries are now being performed in an ambulatory setting.<sup>5-7</sup> This is beneficial from the perspective of the healthcare system, as it leads to the containment of healthcare costs.<sup>1, 8</sup>

However, costs associated with lost productivity following surgery contribute to the total societal costs of surgical procedures as well, and are mostly not taken into account. Moreover, there is considerable evidence that the duration of sick leave following gynaecological surgery generally exceeds the period considered appropriate by specialists.<sup>9</sup> Therefore, preventing unnecessary prolonged recovery following gynaecological surgery, may translate into considerable savings for society.

We developed an Internet-based care programme for patients undergoing gynaecological surgery for benign disease, aimed at facilitating recovery after discharge and preventing delayed return to work.<sup>10, 11</sup> In this paper, we report on the cost-effectiveness and cost-utility of the Internet-based care programme compared to usual care. The findings on clinical effectiveness were reported in a separate paper.

### **Methods**

#### ***Study design and participants***

This economic evaluation was performed from a societal perspective and was carried out alongside a stepped-wedge cluster randomised controlled trial comparing an Internet-based care programme with usual care for patients undergoing benign gynaecological surgery. The study was done in the Netherlands between October 2011 and July 2014. The follow-up period was 12 months. The trial protocol has been published previously in accordance to CONSORT extended guidelines.<sup>9</sup>

The clusters in this trial were formed by separate hospitals. A total of nine hospitals participated, which were selected before the start of the trial. Hospitals were eligible if they

1  
2  
3 performed at least 100 hysterectomies or laparoscopic adnexal surgeries annually, and were  
4 located within 50km of the VU medical centre, Amsterdam, the Netherlands.  
5  
6

7  
8 Patients were recruited from the waiting lists for hysterectomy (abdominal, vaginal or  
9 laparoscopic) and laparoscopic adnexal surgery. Eligible participants were women aged 18-65  
10 who were employed for at least eight hours a week (unpaid or paid employment, or self-  
11 employed). We excluded patients who had severe benign comorbidity, had a malignancy,  
12 were pregnant, were computer or Internet illiterate, were involved in a lawsuit against their  
13 employer, were on disability sick leave before surgery, or had insufficient command of Dutch.  
14  
15  
16  
17  
18

### 19 ***Randomisation and blinding***

20  
21 Randomization took place at the level of the clusters and determined the order in which the  
22 intervention was implemented in the participating hospitals. The sequence was generated by a  
23 statistician using a computer generated list of random numbers. A stepped wedge approach  
24 was employed as it enabled us to study the implementation process as well.<sup>9</sup>  
25  
26  
27  
28

29  
30 Patients, clinicians and researchers could not be blinded for the intervention. However, group  
31 allocation was concealed until patients had agreed to participate and provided written  
32 informed consent. Data analysts (EB, JB) were masked to group allocation.  
33  
34  
35

### 36 ***Intervention care programme and implementation strategy***

37  
38 The development and content of the intervention care programme have been described  
39 elsewhere in more detail.<sup>9, 11</sup> A multi-faceted implementation strategy was employed to  
40 achieve maximal adoption of the care programme, targeting three different levels.  
41  
42  
43  
44

45  
46 At the level of the organization, the structure of healthcare was changed by the introduction of  
47 the interactive web portal that was accessible for patients as well as their healthcare  
48 professionals. In addition, care managers were trained to help patients identify possible  
49 barriers to resuming work activities and could assist, if necessary, in the planning and  
50 execution of work resumption, before and after surgery.  
51  
52  
53

54  
55 At the level of the healthcare professional, educational training sessions were organised to  
56 introduce an earlier developed guideline on postoperative convalescence recommendations to  
57 stimulate evidence-based patient education.<sup>10</sup>  
58  
59  
60

1  
2  
3  
4  
5 At the patient level, the care programme consisted of two steps. First, all participants allocated  
6 to the intervention group received access to the web portal several weeks prior to their surgery  
7 (eHealth intervention). The interactive web portal facilitated self-management by providing  
8 patients with individual tailored convalescence recommendations throughout the entire  
9 surgical pathway as well as monitoring recovery postoperatively through an interactive self-  
10 assessment tool. Second, for those patients at risk of prolonged sick leave, a care manager was  
11 available to provide additional guidance in the process of resuming work activities  
12 (occupational intervention).  
13  
14  
15  
16  
17  
18

### 19 *Usual Care*

20 Before the care programme was implemented in the hospitals, participating patients received  
21 usual care. Although considerable variation in usual care exists in the Netherlands,  
22 postoperative patients generally receive verbal instructions at discharge by a nurse and/or  
23 physician, sometimes accompanied by a letter or brochure. Usually, a postoperative  
24 consultation is planned six weeks after surgery. Due to Dutch legislation, employed patients  
25 who do not resume work within 6 weeks after the surgery are invited for a consultation with  
26 their occupational physician.  
27  
28  
29  
30  
31  
32  
33

### 34 *Main outcome measures*

35 The primary outcome was duration until sustainable return to work (RTW) defined as the  
36 resumption of own work or other work with equal earnings, for at least 4 weeks without  
37 (partial or full) recurrence of sick leave.<sup>12</sup> Data on return to work were collected by means of  
38 monthly electronic sick leave calendars.  
39  
40  
41  
42  
43

44 Quality adjusted life years (QALYs) was one of the secondary outcomes and was measured  
45 using the Dutch version of the EuroQol five-dimensional questionnaire (EQ-5D-3L).<sup>13</sup> The  
46 Dutch tariff was used to estimate the utility of EQ-5D-3L health states.<sup>14</sup> QALYs were  
47 calculated by multiplying the utility with the amount of time a patient spent in a particular  
48 health state. Transitions between health states were linearly interpolated. Other secondary  
49 outcomes included health-related quality of life assessed by Short-Form Health Survey (SF-  
50 36)<sup>15</sup>, and recovery assessed by the Recovery Index (RI-10).<sup>16</sup> All secondary outcomes were  
51 assessed at baseline, and at 2, 6, 12, 26, and 52 weeks follow-up.  
52  
53  
54  
55  
56  
57  
58  
59  
60

### *Service use and costs*

The intervention and implementation strategy costs consisted of costs related to implementing the new care programme. A bottom-up micro-costing approach was used for estimating intervention costs, using detailed data regarding the quantity and unit prices of: (1) the training sessions of involved healthcare professionals (clinical staff, occupational physicians, occupational therapist), (2) the eHealth intervention (hosting of web portal, administrator time), and (3) the occupational intervention (number and duration of consultations).<sup>17</sup>

Data on healthcare services used and support received by the participants were collected using electronic questionnaires during one year. Each month, the patient was asked to report service use over the previous month. Patients who were not sick listed and did not have any healthcare costs during three consecutive months, received a shortened version of the questionnaire. In case of no response, electronic reminders were sent after one and two weeks. If participants did not respond to the electronic reminders either, an additional attempt was made to complete the missing data per email, mail or telephone every three months.

Only healthcare utilization and support related to the gynaecological surgery were collected, and included the following categories: surgery and initial hospitalization, primary and secondary care including complementary medicine, medication and medical aids, home care and informal help.

Service utilization was valued using Dutch standard costs.<sup>18</sup> If these were unavailable, prices according to professional organizations were used. The prices of prescribed drugs were estimated using the prices of the Royal Dutch Society for Pharmacy.<sup>19</sup>

### *Productivity Loss*

Absenteeism costs were calculated using the Human Capital Approach (HCA). The net number of sick leave days during follow-up were multiplied by the estimated costs of one day of sick leave for females, stratified for age.<sup>18</sup> In case of partial sick leave, we assumed that participants were 100% productive during the hours of partial work resumption.

Presenteeism (i.e. reduced productivity while at work) was assessed monthly after full resumption of work using two items of the "Productivity and Disease Questionnaire" (PRODISQ).<sup>20</sup> Patients were asked to report the quantity (q1) and quality (q2) of the work

1  
2  
3 performed during the latest day at work on an 11-point scale, ranging from “nothing/very bad  
4 quality” (0) to “same as normal”(10).  
5  
6

7  
8 The level of presenteeism ( $Pres_{day}$ ) on the latest day at work was calculated using the  
9 following formula:  $Pres_{day} = (1 - ((q1 * q2) / 100))$ .<sup>20, 21</sup> Assuming linearity, the level of  
10 presenteeism on the latest day at work was then extrapolated over the total month. The total  
11 number of workdays lost due to presenteeism were calculated ( $Pres_{month}$ ) by multiplying the  
12 participants’ presenteeism level by their number of days worked during that month.  
13 Subsequently, presenteeism costs per month were calculated by multiplying  $Pres_{month}$ , by the  
14 estimated costs of one day of lost productivity.  
15  
16  
17  
18  
19

20  
21 The index year of the study was 2014. Discounting of costs was not necessary because the  
22 follow-up was one year.<sup>22</sup>  
23  
24

### 25 26 *Statistical analysis*

27  
28 The sample size of the study (n=454) was calculated for detecting a relevant difference in  
29 return to work (hazard ratio (HR) of 1.5) in the main outcome study.<sup>9</sup> The economic  
30 evaluation was done according to the intention to treat principle. Missing cost and effect data  
31 during follow-up were imputed using multiple imputation by chained equations (MICE).  
32 Multiple imputation was done using SPSS 16.0 with predictive mean matching. An  
33 imputation model containing demographic and prognostic variables was used to create five  
34 complete datasets after which the loss of efficiency was smaller than 5%.<sup>23</sup> Rubin’s rules were  
35 used to pool effects and costs from the five imputed datasets.<sup>24</sup>  
36  
37  
38  
39  
40  
41  
42

43 Differences in costs and effects were estimated using linear multilevel regression analyses,  
44 while adjusting for type of surgery. Clustering at the hospital- and patient-level was accounted  
45 for in these multilevel models. For the cost-effectiveness and cost-utility analyses, we  
46 calculated incremental cost-effectiveness ratios (ICERs) by dividing the incremental costs by  
47 the incremental effects. The ICER indicates the additional investments needed for the  
48 intervention to gain one extra unit of effect compared with usual care. In the ICER for  
49 duration until RTW, productivity costs due to sick leave were excluded from the cost  
50 estimates to avoid double counting.  
51  
52  
53  
54  
55  
56  
57  
58  
59  
60

1  
2  
3 We used non-parametric bootstrapping with 5000 replications to estimate 95% confidence  
4 intervals around cost differences and the uncertainty surrounding the ICERs.<sup>25</sup> To account for  
5 the clustering of data, bootstrap replications were stratified for hospital.<sup>26</sup> Bootstrapped cost-  
6 effect pairs were plotted on cost-effectiveness planes (CE planes) and used to estimate cost-  
7 effectiveness acceptability curves (CEA curves). CEA curves show the probability that a  
8 treatment is cost effective in comparison with the control treatment at a specific ceiling ratio,  
9 which is the amount of money society is willing to pay to gain one extra unit of effect.  
10  
11  
12  
13  
14

### 15 16 *Sensitivity analyses*

17 To assess whether protocol deviations influenced the treatment effect, a per-protocol analysis  
18 was performed. In addition, to assess the robustness of the results, we carried out three  
19 sensitivity analyses. Firstly, we did a complete-case analysis to assess the cost-effectiveness  
20 of the interventions excluding patients who were lost to follow-up. Secondly, we replicated  
21 the cost-effectiveness analysis using the Friction Cost Approach. The FCA assumes that costs  
22 are limited to the friction period (i.e. the period needed to replace a sick worker). A friction  
23 period of 23 weeks and an elasticity of 0.8 was used. Thirdly, an analysis from the healthcare  
24 perspective was performed including only healthcare costs.  
25  
26  
27  
28  
29  
30

31 All statistical analyses followed a predefined analysis plan and were done in SPSS (version  
32 16.0) and STATA (version 12SE).  
33  
34  
35

## 36 **Results**

### 37 *Participants*

38 During the study period, 1591 patients were scheduled for a hysterectomy and/or laparoscopic  
39 adnexal surgery in the participating hospitals. In total, 433 patients enrolled in the study, 206  
40 patients during the control phase and 227 patients during intervention phase (figure 1).  
41  
42  
43  
44  
45

46 Participants' demographic and prognostic variables are presented in table 1. Complete follow-  
47 up data were obtained from 92.6% of the participants on the primary outcome RTW, from  
48 71.8% on the secondary outcomes, and 70.0% on healthcare utilization. Baseline  
49 characteristics did not differ between participants with and without complete cost data, except  
50 that patients with complete data on healthcare utilization used the Internet more frequently  
51 than women with incomplete data.  
52  
53  
54  
55  
56  
57

58 **Table 1** Baseline characteristics of individual patients  
59  
60

|                                                                                                                                                                                               | Care Programme<br>(n=227) | Usual Care<br>(n=206) |
|-----------------------------------------------------------------------------------------------------------------------------------------------------------------------------------------------|---------------------------|-----------------------|
| <b>Patient characteristics</b>                                                                                                                                                                |                           |                       |
| Age (years $\pm$ SD)                                                                                                                                                                          | 46.1 $\pm$ 7.3            | 45.6 $\pm$ 6.7        |
| Dutch nationality                                                                                                                                                                             | 220 (96.9%)               | 202 (98.1%)           |
| Internet use (days/week)                                                                                                                                                                      |                           |                       |
| < 1                                                                                                                                                                                           | 2 (0.9%)                  | 3 (1.5%)              |
| 1 – 2                                                                                                                                                                                         | 9 (4.0%)                  | 10 (4.9%)             |
| 3 – 5                                                                                                                                                                                         | 45 (19.8%)                | 42 (20.4%)            |
| > 5                                                                                                                                                                                           | 171 (75.3%)               | 151 (73.3%)           |
| Education level *                                                                                                                                                                             |                           |                       |
| Low                                                                                                                                                                                           | 25 (11.0%)                | 17 (8.3%)             |
| Intermediate                                                                                                                                                                                  | 88 (38.8%)                | 100 (48.5%)           |
| High                                                                                                                                                                                          | 114 (50.2%)               | 89 (43.2%)            |
| <b>Surgery-related characteristics</b>                                                                                                                                                        |                           |                       |
| Type of surgery                                                                                                                                                                               |                           |                       |
| Adnexal surgery                                                                                                                                                                               | 74 (32.6%)                | 51 (24.8%)            |
| Laparoscopic hysterectomy                                                                                                                                                                     | 65 (28.6%)                | 50 (24.3%)            |
| Vaginal hysterectomy                                                                                                                                                                          | 36 (15.9%)                | 53 (25.7%)            |
| Abdominal hysterectomy                                                                                                                                                                        | 52 (22.9%)                | 52 (25.2%)            |
| <b>Health-related characteristics</b>                                                                                                                                                         |                           |                       |
| Perceived health status (mean $\pm$ SD)                                                                                                                                                       | 75.8 $\pm$ 16.5           | 76.9 $\pm$ 16.7       |
| <b>Work-related characteristics</b>                                                                                                                                                           |                           |                       |
| Type of work                                                                                                                                                                                  |                           |                       |
| Salary employed                                                                                                                                                                               | 194 (85.5%)               | 175 (85.0%)           |
| Self-employed                                                                                                                                                                                 | 28 (12.3%)                | 28 (13.6%)            |
| Voluntary work                                                                                                                                                                                | 5 (2.2%)                  | 3 (1.5%)              |
| Work hours per week (mean $\pm$ SD)                                                                                                                                                           | 29.7 $\pm$ 9.3            | 28.7 $\pm$ 8.2        |
| Sick leave (3 months before surgery)                                                                                                                                                          |                           |                       |
| Absence from work <sup>§</sup>                                                                                                                                                                | 88 (38.8%)                | 66 (32.0%)            |
| Number of sick leave days (median (IQR))                                                                                                                                                      | 4.0 (2-10)                | 4.5 (2-11)            |
| RTW expectation (long) <sup>†</sup>                                                                                                                                                           | 42 (18.5%)                | 38 (18.4%)            |
| RTW intention (low) <sup>‡</sup>                                                                                                                                                              | 45 (19.8%)                | 67 (32.5%)            |
| Data are number of patients (%), unless otherwise indicated.                                                                                                                                  |                           |                       |
| * Low=preschool, primary school; intermediate=secondary school; high=tertiary school, university, or postgraduate.                                                                            |                           |                       |
| <sup>§</sup> Defined as at least 1 day absence.                                                                                                                                               |                           |                       |
| <sup>†</sup> Defined as expectation longer than 3 weeks for adnexal surgery, longer than 6 weeks for laparoscopic or vaginal hysterectomy, or longer than 8 weeks for abdominal hysterectomy. |                           |                       |
| <sup>‡</sup> Defined as score 4 or 5 (range 1-5).                                                                                                                                             |                           |                       |
| RTW, return to work.                                                                                                                                                                          |                           |                       |

### Service use and costs

Table 2 presents the costs of self-reported service use per category over the 12 months of follow-up stratified by treatment group and the mean cost differences between both groups.



Intervention costs were €80 per participant (online supplementary table S1). Total societal costs per patient were €12,266 in the intervention group and €13,795 in the usual care group. After correction for clustering by hospital and adjustment for surgery type, total societal costs in the intervention group were €647 lower compared to the usual care group, but this difference was not statistically significant (95% CI €-2116 to €753). In both groups, costs related to productivity losses were about two times higher than total healthcare costs. There was no statistical significant differences in healthcare costs between the intervention group and usual care group (€-61; 95% CI €-361 to €218) and lost productivity costs (€-570; 95% CI €-1909 to €692). Only costs for secondary care were significantly lower in the intervention group compared to the usual care group (€-178; 95% CI €-400 to €-31).

**Table 2** Costs associated with self-reported service used across treatment groups at 12 months follow-up

| Cost category                         | Intervention<br>mean<br>(SEM)<br>n=227 | Usual care<br>mean<br>(SEM)<br>n=206 | Mean cost<br>difference<br>(95% CI)* |
|---------------------------------------|----------------------------------------|--------------------------------------|--------------------------------------|
| <b>Healthcare costs</b>               | <b>3823 (99)</b>                       | <b>4142 (134)</b>                    | <b>-61 (-361 to 218)</b>             |
| Surgery costs                         | 3236 (64)                              | 3413 (58)                            | 34 (-118 to 174)                     |
| Primary care costs                    | 179 (24)                               | 167 (30)                             | 14 (-58 to 95)                       |
| Secondary care costs                  | 242 (42)                               | 458 (98)                             | -178 (-400 to -31)                   |
| Costs of medication and aids          | 13 (4)                                 | 10 (4)                               | 3 (-6 to 11)                         |
| Home help costs                       | 72 (24)                                | 94 (26)                              | -19 (-85 to 45)                      |
| Intervention                          | 80 (0)                                 | NA                                   | 80 (NA)                              |
| <b>Lost productivity costs</b>        | <b>8443 (543)</b>                      | <b>9653 (528)</b>                    | <b>-570 (-1909 to 692)</b>           |
| Costs of absenteeism from unpaid work | 1845 (224)                             | 2124 (299)                           | -144 (-756 to 282)                   |
| Costs of absenteeism from paid work   | 6499 (425)                             | 7281 (344)                           | -424 (-1469 to 578)                  |
| Presenteeism costs                    | 99 (78)                                | 248 (127)                            | -154 (-458 to 82)                    |
| <b>Total societal costs</b>           | <b>12266 (596)</b>                     | <b>13795 (602)</b>                   | <b>-647 (-2116 to 735)</b>           |

Costs are expressed in 2014 Euros (€1.00 = £0.85; \$1.06).

Mean values summarize the costs derived after the imputation process.

\* Uncertainty estimated using bootstrapping and corrected for clustering by hospital and type of surgery

SEM, standard error; CI, confidence interval; NA, not applicable.

### *Effectiveness*

The mean duration until RTW in the intervention group was 49.6 days versus 56.2 days in the usual care group. The adjusted difference in duration until RTW between intervention and usual care was -4.1 days, but this difference was not statistically significant (95% CI -10.8 to 2.6) (table 3). For the other outcomes, no statistically differences were found between both groups at 12 months either.



**Table 3** Effects across treatment groups at 12 months follow-up

| <b>Outcomes</b>           | <b>Intervention<br/>Mean (SEM)<br/>n=227</b> | <b>Usual care<br/>Mean (SEM)<br/>n=206</b> | <b>Mean effect difference<br/>(95% CI) *</b> |
|---------------------------|----------------------------------------------|--------------------------------------------|----------------------------------------------|
| Duration until RTW (days) | 49.6 (2.7)                                   | 56.2 (2.2)                                 | -4.1 (-10.8 to 2.6)                          |
| QALY's gained             | 0.96 (0.008)                                 | 0.96 (0.007)                               | -0.001 (-0.023 to 0.020)                     |
| HR-QoL (SF-36)            |                                              |                                            |                                              |
| PCS                       | 5.7 <sup>§</sup> (0.7)                       | 6.7 <sup>§</sup> (0.6)                     | -0.7 (-2.6 to 1.1)                           |
| MCS                       | 3.3 <sup>§</sup> (0.7)                       | 3.7 <sup>§</sup> (0.8)                     | -0.4 (-2.5 to 1.7)                           |
| Recovery (RI-10)          | 24.3 <sup>§</sup> (0.4)                      | 25.0 <sup>§</sup> (0.5)                    | -0.6 (-2.0 to 0.9)                           |

\* Uncertainty estimated using bootstrapping and corrected for clustering by hospital and type of surgery.

<sup>§</sup> Difference between baseline score and score at 12 months follow-up.

SEM, standard error; CI, confidence interval; RTW, return to work; QALY, Quality Adjusted Life Year; HR-QoL, health-related quality of life; SF, Short Form; PCS, physical component scale; MSC, mental component scale; RI, recovery index.

### *Cost-effectiveness*

The results of the cost-effectiveness analysis for duration until RTW are presented in table 4. The incremental cost-effectiveness ratio (ICER) for sustainable RTW was 56 indicating that each day earlier RTW in the intervention group is associated with cost savings of 56 euros in comparison with the usual care group. In the cost-effectiveness plane, 69% of the incremental cost effect pairs were located in the south east quadrant indicating that the intervention is more effective and less costly than usual care (figure 2a). The cost-effectiveness acceptability curve presented in figure 2b shows that if the societal willingness-to-pay (WTP) for one earlier day of RTW is €0, the probability that the intervention is cost-effective in comparison with usual care is 0.79. This probability increases to 0.97 at max if the WTP is €76 per day earlier RTW.

As the differences observed for the outcomes health-related quality of life and recovery after 12 months were small and not significant, the ICERs for these outcomes were quite large. In the cost-effectiveness planes, the majority of cost-effect pairs were located in the southern quadrants, indicating the intervention was less expensive. However, the cost-effect pairs were roughly divided between the eastern and western quadrant indicating that the intervention can lead to both better and worse outcomes compared to usual care.

**Table 4** Differences in pooled means costs and effects, incremental cost-effectiveness ratios and the distribution of incremental cost-effectiveness pairs around the quadrants of the cost-effectiveness planes (main analysis)

| Outcome          | $\Delta$ Cost* (€)  | $\Delta$ Effect* (days)         | ICER   | Distribution CE-plane |                 |                 |                 |
|------------------|---------------------|---------------------------------|--------|-----------------------|-----------------|-----------------|-----------------|
|                  | mean (95% CI)       | mean (95% CI)                   |        | €/day                 | NE <sup>1</sup> | SE <sup>2</sup> | SW <sup>3</sup> |
| RTW              | -228 (-708 to 136)  | 4.1 <sup>§</sup> (-2.6 to 10.8) | -56    | 15%                   | 69%             | 10%             | 6%              |
| QALY's gained    | -647 (-2116 to 735) | -0.001 (-0.023 to 0.020)        | 501187 | 4%                    | 42%             | 35%             | 19%             |
| HR-QoL (SF36)    |                     |                                 |        |                       |                 |                 |                 |
| PCS              | -647 (-2116 to 735) | -0.7 (-2.6 to 1.1)              | 870    | 6%                    | 19%             | 58%             | 17%             |
| MCS              | -647 (-2116 to 735) | -0.4 (-2.5 to 1.7)              | 1573   | 10%                   | 33%             | 44%             | 13%             |
| Recovery (RI-10) | -647 (-2116 to 735) | -0.6 (-2.0 to 0.9)              | 1127   | 5%                    | 22%             | 55%             | 18%             |

\* uncertainty estimated using bootstrapping and corrected for clustering by hospital and type of surgery

<sup>§</sup> Note that a positive value indicates faster RTW in the intervention group compared to the control group.

<sup>1</sup> Refers to the northeast quadrant of the CE-plane, indicating that the intervention care programme is more effective and more costly than usual care.

<sup>2</sup> Refers to the southeast quadrant of the CE-plane, indicating that the intervention care programme is more effective and less costly than usual care.

<sup>3</sup> Refers to the southwest quadrant of the CE-plane, indicating that the intervention care programme is less effective and less costly than usual care.

<sup>4</sup> Refers to the northeast quadrant of the CE-plane, indicating that the intervention care programme is less effective and more costly than usual care.

ICER, Incremental Cost-Effectiveness Ratio; CE plane, cost-effectiveness plane; RTW, return to work;

QALY, Quality Adjusted Life Year; HR-QoL, health-related quality of life; SF, Short Form; PSC, physical component scale; MSC, mental component scale; RI, recovery index.

**Table 5** Results from the per-protocol and sensitivity analyses (Return to Work)

| Analysis               | Sample size |     | $\Delta$ Cost* (€)<br>mean (95% CI) | $\Delta$ Effect* (days)<br>mean (95% CI) | ICER<br>€/day | Distribution CE-plane |                 |                 |                 |
|------------------------|-------------|-----|-------------------------------------|------------------------------------------|---------------|-----------------------|-----------------|-----------------|-----------------|
|                        | IC          | UC  |                                     |                                          |               | NE <sup>1</sup>       | SE <sup>2</sup> | SW <sup>3</sup> | NW <sup>4</sup> |
| Per-protocol analysis  | 205         | 188 | -359 (-866 to -11)                  | 6.4 <sup>§</sup> (-0.2 to 12.9)          | -56           | 8%                    | 87%             | 5%              | 1%              |
| Complete-case analysis | 154         | 150 | -45 (-466 to 362)                   | 11.6 <sup>§</sup> (-5.4 to 19.3)         | -4            | 45%                   | 55%             | 0%              | 0%              |
| Friction cost approach | 227         | 206 | -228 (-708 to 136)                  | 4.1 <sup>§</sup> (-2.6 to 10.8)          | -56           | 15%                   | 69%             | 10%             | 6%              |
| Healthcare perspective | 227         | 206 | -61 (-361 to 218)                   | 4.1 <sup>§</sup> (-2.6 to 10.8)          | -15           | 28%                   | 56%             | 5%              | 10%             |

\* uncertainty estimated using bootstrapping and corrected for clustering by hospital and type of surgery

<sup>§</sup> Note that a positive value indicates faster RTW in the intervention group compared to the control group.

<sup>1</sup> Refers to the northeast quadrant of the CE-plane, indicating that the intervention care programme is more effective and more costly than usual care.

<sup>2</sup> Refers to the southeast quadrant of the CE-plane, indicating that the intervention care programme is more effective and less costly than usual care.

<sup>3</sup> Refers to the southwest quadrant of the CE-plane, indicating that the intervention care programme is less effective and less costly than usual care.

<sup>4</sup> Refers to the northwest quadrant of the CE-plane, indicating that the intervention care programme is less effective and more costly than usual care.

IC, intervention care; UC, usual care; ICER, Incremental Cost-Effectiveness Ratio; CE plane, cost-effectiveness plane.

### *Cost-utility*

The difference in QALYs gained over 12 months between the two study groups was small and not statistically significant or clinically relevant (table 4). Therefore, the ICER for QALYs became extraordinary large (half million Euros). As a result, the probability that the intervention was cost-effective in comparison with usual care was considerably lower than for the primary outcome (0.77 at WTP is €0 per QALY gained and decreasing at higher WTP values).

### *Per-protocol analysis*

In the per-protocol analysis 40 patients were excluded because they did not receive the care according to protocol due to several reasons: did not fit the inclusion criteria (n=3); had a more severe surgery than planned (n=25), or had a complicated postoperative course and needed a repeat surgery during follow-up (n=12). By excluding those patients, the difference in effect became larger, but was still not significant (-6.4 days, 95% CI -12.9 to 0.20) and the cost differences became statistically significant in favour of the intervention (mean difference €-359, 95% CI -866 to -11) (table 5). Hence, compared to the main analysis, the probability of cost-effectiveness increased considerably at a WTP of €0 per one day earlier RTW (from 0.79 to 0.92).

### *Sensitivity analyses*

The results of the primary outcome in the sensitivity analyses differed in some aspects from the main analysis (table 5). First, in the complete-case analysis, the effect difference between study groups became larger in favour of the intervention group, but the cost savings in the intervention group as compared to usual care became smaller. The probability of cost-effectiveness compared to the main analysis therefore decreased (from 0.79 to 0.55). Second, in the analyses performed from the healthcare perspective, cost savings became much smaller, as costs associated with lost productivity were not taken into account. As a result the probability of cost-effectiveness reduced (from 0.79 to 0.61). Finally, the results from the friction cost analysis were identical to the intention to treat analysis, indicating that the majority of patients returned to their work before the end of the friction period of 23 weeks.

The results of the per-protocol analyses and sensitivity analyses for the secondary outcomes QALYs, health-related quality of life and recovery are presented in online supplementary table S2. In the per-protocol analyses, cost differences became larger in favour of the

1  
2  
3 intervention group, however, they did not reach statistical significance. The probability of  
4 cost-effectiveness at a WTP of €0 per unit of effect increased from 0.77 to 0.93. In contrast to  
5 the complete-case analysis for the primary outcome, the complete-case analyses for the  
6 secondary outcomes showed a statistical significant increase in cost savings in the  
7 intervention group. The probability of cost-effectiveness at a WTP of €0 per unit of effect  
8 increased from 0.77 to 0.98  
9  
10  
11  
12  
13

## 14 **Discussion**

15  
16 In this study, we evaluated the cost-effectiveness and cost-utility of a rigorously designed  
17 Internet-based perioperative care programme compared with usual care for gynaecological  
18 patients. Our results show that for the primary outcome duration until full resumption of  
19 work, the probability that the care programme is cost-effective as compared to usual care is  
20 0.97 at a willingness to pay of €76 per day earlier RTW. Taking into account that the average  
21 costs per sick leave day are €230, we conclude that the intervention is cost-effective as  
22 compared to usual care.  
23  
24  
25  
26  
27  
28

## 29 *Interpretation of the findings*

30  
31 In the current economic evaluation, the adjusted mean difference until RTW between study  
32 groups was not statistically significant (-4.1 days, 95% CI -10.8 to 2.6). In the accompanying  
33 paper on the clinical effectiveness of the intervention, median days until RTW were compared  
34 between study arms using Cox regression analyses. However, survival analysis results in  
35 difficulties in interpreting the ICER. Therefore, we chose to compare mean days until RTW in  
36 the current cost-effectiveness study and used bootstrapping to account for the skewed  
37 distribution of this variable.  
38  
39  
40  
41  
42  
43

44  
45 In addition, the cost-difference between the intervention group and the control group was not  
46 statistically significant either, although total societal costs were lower in the intervention  
47 group than in the control group. A possible explanation might be that the sample size of this  
48 study was based on the primary outcome full sustainable return to work, and, therefore,  
49 underpowered to detect relevant cost differences, as cost data are right skewed and require  
50 relative large samples.<sup>27</sup>  
51  
52  
53  
54  
55

56  
57 Secondary care costs in the intervention group were lower compared to the usual care group.  
58 Future research should investigate if the care programme truly leads to different health  
59  
60

1  
2  
3 seeking behaviour. Possibly, patients receiving additional perioperative care were more  
4 confident in their own self-management skills preventing them from visiting a healthcare  
5 professional. In addition, costs associated with primary care were similar in both groups,  
6 demonstrating that the care programme did not cause a shift from secondary care to primary  
7 care in the intervention group compared to the usual care group. Concerns of increased  
8 workload in the primary care setting due to changes in perioperative care have been reported  
9 before, however, seem to be ungrounded.<sup>28, 29</sup>

10  
11  
12  
13  
14  
15  
16 We did not find any clinical relevant differences in the secondary outcomes. Thus, despite the  
17 possible difference in the RTW rates between study groups, this did not have an effect on  
18 patients' perceptions about their quality of life and recovery. Possibly, the surgery itself has a  
19 much larger impact on these outcomes than the method of postoperative guidance.

20  
21  
22  
23  
24 The results of the per-protocol analyses, were slightly more favourable than those of the main  
25 analyses. Thus, by presenting the intervention to the ideal target population, the probability of  
26 cost-effectiveness of the intervention in comparison with usual care increases. This is in  
27 concordance with our initial objective to develop Internet-based care programme for women  
28 undergoing an uncomplicated surgical procedure.<sup>10</sup> It may be challenging to identify future  
29 patients who will benefit most from the care programme, as complications cannot always be  
30 predicted pre-operatively. In addition, it should be investigated further what the needs are of  
31 patients with a complicated course and how they should best be guided and monitored during  
32 their recovery.

### 33 34 35 36 37 38 39 40 41 ***Strengths and weaknesses of the study***

42 Several strengths of the present study are noteworthy. First of all, we are not aware of other  
43 current perioperative interventions that aim at preventing unnecessary prolonged recovery and  
44 reducing sick leave in order to contain societal costs associated with gynaecological surgical  
45 care. Second, analyses were performed alongside a pragmatic trial, allowing prospective  
46 collection of relevant cost and effect data and enabling the evaluation of the intervention's  
47 cost-effectiveness under real world conditions.<sup>27</sup> The third strength concerns the use of linear  
48 multilevel analyses to account for possible clustering of data as a result of the chosen study  
49 design. Randomization at cluster level was chosen to prevent contamination between the  
50 study arms. Moreover, the employment of a stepped wedge design allowed the sequential  
51  
52  
53  
54  
55  
56  
57  
58  
59  
60

1  
2  
3 implementation of the care programme in the participating hospitals, providing the possibility  
4 to study the implementation process as well.  
5  
6

7  
8 Our study also has limitations. The first limitation is the collection of cost data through self-  
9 reported retrospective questionnaires. However, since administrative data on service use are  
10 very hard to obtain in the Netherlands, societal cost data can only be collected by means of  
11 self-report. In order to prevent recall-bias, we minimised the recall period to only one month.  
12 In addition, if there was recall bias, it seems unlikely that this systematically differed between  
13 the study groups. Therefore, we expect that this does not affect our estimations. A second  
14 limitation concerns the amount of incomplete data. Despite our efforts to obtain full data from  
15 the patients in the trial, only 70.4% of the study population had complete cost data. Although  
16 this is an acceptable rate of missing data, complete-case analyses may be biased and have less  
17 precision.<sup>30, 31</sup> We tried to account for this by applying multiple imputation for missing data.<sup>32</sup>  
18 Comparison of participants with complete and incomplete data resulted in a number of  
19 variables that predicted the presence of missing data. Therefore, we concluded that the data  
20 was missing at random, making multiple imputation the appropriate method to deal with the  
21 missing data. Finally, it should be noted that a typical feature of Internet-based interventions  
22 is the risk of selection bias towards the higher educated participant. Also in our study,  
23 included participant were employed women of which the majority was highly educated, and  
24 patients that were computer or Internet illiterate were excluded. Therefore, caution is needed  
25 when generalising the findings, as clinical and cost-effectiveness may be reduced when the  
26 intervention is accessible for the general audience. Moreover, due to (cultural) differences in  
27 attitudes towards health and work as well as differences in the organization of social and  
28 health care systems, generalisability of the results across countries might be hampered as well.  
29  
30  
31  
32  
33  
34  
35  
36  
37  
38  
39  
40  
41  
42  
43  
44

#### 45 ***Comparison with other studies***

46 We showed that costs associated with productivity loss following gynaecological surgery  
47 were about two times higher than healthcare costs. We are not aware of previously published  
48 literature in the gynaecological field in which this was demonstrated before. As a matter of  
49 fact, outcomes such as long-term convalescence, return to normal activities and absenteeism  
50 following gynaecological surgery are under-reported in clinical trials. In a review of Roumm  
51 et. al. assessing the clinical and economic benefits of minimal invasive surgery compared to  
52 open alternatives, only five of the 19 eligible studies reported data on return to work or return  
53 to normal activities, while 15 studies reported on hospital costs and all studies reported on  
54  
55  
56  
57  
58  
59  
60



1  
2  
3 length of stay.<sup>33</sup> Similarly, in a recent Cochrane systematic review assessing the effectiveness  
4 and safety of different surgical approaches to hysterectomy in women with benign  
5 gynaecological disease, 45 of the 47 included studies reported on the length of postoperative  
6 hospital stay and only 19 studies reported data on return to normal activities.<sup>34</sup>  
7  
8  
9

10  
11 Cost-effectiveness is one of the most frequently cited reason for developing Internet  
12 interventions, because of the relative low delivery costs and the potential high impact.<sup>35</sup>  
13 However, economic evaluations are mainly lacking. A recent systematic review that evaluated  
14 the effect of perioperative e-Health interventions on the postoperative course, concluded that  
15 only 6 of 19 included studies reported on costs and in only one study a full economic  
16 evaluation was performed.<sup>36</sup> Thus, the current study addresses this literature gap as well.  
17  
18  
19  
20  
21

### 22 ***Policy implications and recommendations***

23  
24 Whether the perioperative Internet-based care programme under study is considered cost-  
25 effective in comparison with usual care in accelerating return to work following  
26 gynaecological surgery depends on society's willingness to pay for a reduced sick leave day,  
27 as well as the probability of cost-effectiveness that is considered acceptable. Our results show  
28 that the probability of cost-effectiveness is 0.97 at a WTP of €76 per day earlier RTW.  
29 Considering that on average the costs of a day of sickness absence are €230,<sup>18</sup> we expect that  
30 this intervention can be considered cost-effective in comparison with usual care.  
31  
32  
33  
34  
35  
36  
37

38 A latent barrier to future acceptance and implementation of the care programme lies in the  
39 fact that the costs and benefits of the care programme are separated between different types of  
40 stakeholders. In the Netherlands, medical costs are paid by the government and health  
41 insurance companies and sickness benefits are the main responsibility of the employers,  
42 which makes the shifting of costs across these sectors hard. As follows, investments are made  
43 in the healthcare sector for implementing the care programme and changing care processes,  
44 while the largest benefits accrue to employers through reduced lost productivity costs.  
45 However, many countries have an employer-provided health insurance (e.g. the United  
46 States), and in those countries this Internet-based care programme is much more likely to be  
47 adapted as investments in the Internet-based care programme may directly lead to savings  
48 through improved productivity rates.  
49  
50  
51  
52  
53  
54  
55  
56  
57

### 58 **Conclusions**



1  
2  
3 The encouraging outcomes of this trial show that there is an economic case for supporting  
4 patients in the perioperative period with an Internet-based care programme. The care  
5 programme has a potential to lead to societal cost savings as a result of a reduction in the  
6 duration until full sustainable RTW. If society is willing to pay €76 per day earlier RTW, the  
7 care programme is considered cost-effective in comparison with usual care in women  
8 undergoing benign gynaecological surgery. Policy makers should investigate how these  
9 monetary benefits can be distributed across stakeholders.  
10  
11  
12  
13

### 14 15 16 **Acknowledgements**

17 We thank the participants of this trial. Mr. D. Stomp is thanked for his extensive role in  
18 developing the web portal. Mr. D. Knol is thanked for his statistical contributions in the  
19 earlier phases of this research. Ms. A. Scholten is thanked for her role in the recruitment of  
20 patients.  
21  
22  
23  
24

### 25 26 **Contributorship statement**

27 All named authors made substantial contributions to this study and the article. EVB, HAB,  
28 JRA, and JAH participated in the design and/or execution of the study, the interpretation of  
29 data, and the drafting and/or revision of the article. JEB and JMD were involved in the  
30 statistical data analyses and interpretation of the data, and the revision of the article. All  
31 named authors approved the final version of the manuscript. EVB and JAH are the study  
32 guarantors.  
33  
34  
35  
36  
37  
38

### 39 40 **Funding statement**

41 This study is funded by the Netherlands Organisation for Scientific Research and  
42 Development (ZonMw grants 171102015 and 92003590). ZonMw did not have any  
43 involvement in the study design, data collection, analysis or interpretation, nor in writing the  
44 report and decision to submit for publication. The views expressed in this report are those of  
45 the authors and not necessarily of those of ZonMw.  
46  
47  
48  
49

### 50 51 **Competing interests statement**

52 All authors have completed the ICMJE uniform disclosure form at:  
53 [www.icmje.org/coi\\_disclosure.pdf](http://www.icmje.org/coi_disclosure.pdf). Dr. Anema reports a chair in Insurance Medicine paid by  
54 the Dutch Social Security Agency, and he is stockholder of Evalua LTD. Dr. Huirne reports  
55 grants from Samsung, grants from Gideon Richter, grants from Celonova, outside the  
56  
57  
58  
59  
60

1  
2  
3 submitted work. Dr. Brölmann reports grants from Olympus, personal fees from Nordic  
4 Farma, during the conduct of the study . Dr. Anema and dr. Huirne are planning to set up a  
5 spin-off company concerning the implementation of a mobile application concerning the  
6 IKHERSTEL intervention in the Netherlands. The remaining authors have nothing to  
7 disclose.  
8  
9  
10

### 11 12 13 **Ethics approval**

14 The study protocol was approved by the Institutional Review Board of the VU University  
15 Medical Centre (16 May 2011, no. 2011/142) and by the medical ethics committees of all  
16 other participating Onze Lieve Vrouwe Gasthuis Oost (Amsterdam), Meander Medical Center  
17 (Amersfoort), Amstelland Hospital (Amsterdam), Medical Center Alkmaar (Alkmaar),  
18 Diaconessenhuis (Utrecht), Spaarne Gasthuis (locations Haarlem and Hoofddorp), and Flevo  
19 Hospital (Almere). Informed consent was obtained from all participants.  
20  
21  
22  
23  
24  
25

### 26 **Data sharing**

27 No additional data are available, though details on statistical analyses are available from the  
28 corresponding author on request.  
29  
30  
31  
32

### 33 **Figure legends**

#### 34 **Figure 1** Trial profile

35 No legend needed  
36  
37  
38

#### 39 **Figure 2** Cost-effectiveness planes and cost-effectiveness acceptability curves for RTW and 40 QALYs

41 Legend: The cost-effectiveness planes (a,c) indicate the uncertainty around the incremental  
42 cost-effectiveness ratio. The cost-effectiveness acceptability curves (b,d) indicate the  
43 probability of cost-effectiveness for different values (€) of willingness to pay per unit of effect  
44 gained. RTW, return to work; QALY, Quality Adjusted Life Year.  
45  
46  
47  
48  
49  
50

### 51 **Supplementary files**

52 **Supplementary table S1** Costs of the intervention care programme from the societal  
53 perspective, valued using a bottom-up micro-costing approach.  
54  
55  
56  
57  
58  
59  
60

1  
2  
3 **Supplementary table S2** Differences in pooled means costs and effects, incremental cost-  
4 effectiveness ratios and the distribution of incremental cost-effectiveness pairs around the  
5 quadrants of the cost-effectiveness plane.  
6  
7  
8

### 9 10 **References**

- 11 1. Cox H. Recovery from gynaecological day surgery: are we underestimating the  
12 process. *Journal of Ambulatory Surgery*. 2003;10:114-21.
- 13 2. Horvath KJ. Postoperative recovery at home after ambulatory gynecologic  
14 laparoscopic surgery. *J Perianesth Nurs*. 2003;18(5):324-34.
- 15 3. Gilmartin J. Contemporary day surgery: patients' experience of discharge and  
16 recovery. *J Clin Nurs*. 2007;16(6):1109-17.
- 17 4. Evenson M, Payne D, Nygaard I. Recovery at home after major gynecologic surgery:  
18 how do our patients fare? *Obstet Gynecol*. 2012;119(4):780-4.
- 19 5. Kehlet H, Wilmore DW. Multimodal strategies to improve surgical outcome. *Am J*  
20 *Surg*. 2002;183(6):630-41.
- 21 6. Kjolhede P, Borendal Wodlin N, Nilsson L, Fredrikson M, Wijma K. Impact of stress  
22 coping capacity on recovery from abdominal hysterectomy in a fast-track programme:  
23 a prospective longitudinal study. *BJOG*. 2012;119(8):998-1006.
- 24 7. Wodlin NB, Nilsson L. The development of fast-track principles in gynecological  
25 surgery. *Acta Obstet Gynecol Scand*. 2013;92(1):17-27.
- 26 8. Naidu M, Sultan AH, Thakar R. Convalescence advice following gynaecological  
27 surgery. *J Obstet Gynaecol*. 2012;32(6):556-9.
- 28 9. Bouwsma EVA, Anema JR, Vonk Noordegraaf A, Knol DL, Bosmans JE, Schraffordt  
29 Koops SE, et al. The cost effectiveness of a tailored, web-based care program to  
30 enhance postoperative recovery in gynecologic patients in comparison with usual care:  
31 protocol of a stepped wedge cluster randomized controlled trial. *JMIR Res Protoc*.  
32 2014;3(2):e30.
- 33 10. Vonk Noordegraaf A, Huirne JAF, Brolmann HAM, Van Mechelen W, Anema JR.  
34 Multidisciplinary convalescence recommendations after gynaecological surgery: a  
35 modified Delphi method among experts. *BJOG*. 2011;118(13):1557-67.
- 36 11. Vonk Noordegraaf A, Huirne JAF, Pittens CA, van Mechelen W, Broerse JEW,  
37 Brolmann HAM, et al. eHealth Program to Empower Patients in Returning to Normal  
38 Activities and Work After Gynecological Surgery: Intervention Mapping as a Useful  
39 Method for Development. *J Med Internet Res*. 2012;14(5):e124.
- 40  
41  
42  
43  
44  
45  
46  
47  
48  
49  
50  
51  
52  
53  
54  
55  
56  
57  
58  
59  
60

12. de Vet HCW, Heymans MW, Dunn KM, Pope DP, van der Beek AJ, Macfarlane GJ, et al. Episodes of low back pain: a proposal for uniform definitions to be used in research. *Spine (Phila Pa 1976)*. 2002;27(21):2409-16.
13. Dolan P. Modeling valuations for EuroQol health states. *Med Care*. 1997;35(11):1095-108.
14. Lamers LM, Stalmeier PF, McDonnell J, Krabbe PF, van Busschbach JJ. [Measuring the quality of life in economic evaluations: the Dutch EQ-5D tariff]. *Ned Tijdschr Geneeskd*. 2005;149(28):1574-8.
15. Aaronson NK, Muller M, Cohen PD, Essink-Bot ML, Fekkes M, Sanderman R, et al. Translation, validation, and norming of the Dutch language version of the SF-36 Health Survey in community and chronic disease populations. *J Clin Epidemiol*. 1998;51(11):1055-68.
16. Kluivers KB, Hendriks JCM, Mol BWJ, Bongers MY, Vierhout ME, Brolmann HAM, et al. Clinimetric properties of 3 instruments measuring postoperative recovery in a gynecologic surgical population. *Surgery*. 2008;144(1):12-21.
17. Frick KD. Microcosting quantity data collection methods. *Med Care*. 2009;47(7 Suppl 1):S76-S81.
18. Hakkaart-van Roijen L, Tan S, Bouwmans C. Handleiding Voor Kostenonderzoek. Methoden en Standaardkostprijzen Voor Economische Evaluaties in de Gezondheidszorg. 2010.
19. Z-index. G-Standaard. Z-index [Internet]. 2014. Available from: <http://www.webcitation.org/6NnSqBHJW>.
20. Koopmanschap MA. PRODISQ: a modular questionnaire on productivity and disease for economic evaluation studies. *Expert Rev Pharmacoecon Outcomes Res*. 2005;5(1):23-8.
21. van Dongen JM, van Wier MF, Tompa E, Bongers PM, van der Beek AJ, van Tulder MW, et al. Trial-based economic evaluations in occupational health: principles, methods, and recommendations. *J Occup Environ Med*. 2014;56(6):563-72.
22. Drummond MF, Sculpher MJ, Torrance GW, O'Brien BJ, Stoddart GL. *Methods for the Economic Evaluation of Health Care Programmes*. 3 ed. New York: Oxford University Press; 2005.
23. White IR, Royston P, Wood AM. Multiple imputation using chained equations: Issues and guidance for practice. *Stat Med*. 2011;30(4):377-99.

- 1
- 2
- 3 24. Rubin DB. Multiple Imputation for Nonresponse in Surveys. New York, NY: John
- 4 Wiley & Sons; 1987.
- 5
- 6 25. Efron B. Missing Data, Imputation, and the Bootstrap. *Journal of the American*
- 7 *Statistical Association*. 2012;89(426):463-75.
- 8
- 9 26. van der Leeden R. Resampling multilevel models. *Handbook of Multilevel Analysis*:
- 10 Springer Science, editors; 2008.
- 11
- 12 27. Petrou S, Gray A. Economic evaluation alongside randomised controlled trials: design,
- 13 conduct, analysis, and reporting. *BMJ*. 2011;342:d1548.
- 14
- 15 28. Bailey J, Roland M, Roberts C. Is follow up by specialists routinely needed after
- 16 elective surgery? A controlled trial. *J Epidemiol Community Health*. 1999;53(2):118-
- 17 24.
- 18
- 19 29. Easton K, Read MD, Woodman NM. Influence of early discharge after hysterectomy
- 20 on patient outcome and GP workloads. *J Obstet Gynaecol*. 2003;23(3):271-5.
- 21
- 22 30. Burton A, Billingham LJ, Bryan S. Cost-effectiveness in clinical trials: using multiple
- 23 imputation to deal with incomplete cost data. *Clin Trials*. 2007;4(2):154-61.
- 24
- 25 31. MacNeil VJ, Eekhout I, Dijkgraaf MG, van HH, de Rooij SE, Heymans MW, et al.
- 26 Multiple imputation strategies for zero-inflated cost data in economic evaluations:
- 27 which method works best? *Eur J Health Econ*. 2016;17(8):939-50.
- 28
- 29 32. Briggs A, Clark T, Wolstenholme J, Clarke P. Missing... presumed at random: cost-
- 30 analysis of incomplete data. *Health Econ*. 2003;12(5):377-92.
- 31
- 32 33. Roumm AR, Pizzi L, Goldfarb NI, Cohn H. Minimally invasive: minimally
- 33 reimbursed? An examination of six laparoscopic surgical procedures. *Surg Innov*.
- 34 2005;12(3):261-87.
- 35
- 36 34. Aarts JW, Nieboer TE, Johnson N, Tavender E, Garry R, Mol BW, et al. Surgical
- 37 approach to hysterectomy for benign gynaecological disease. *Cochrane Database Syst*
- 38 *Rev*. 2015(8):CD003677.
- 39
- 40 35. Tate DF, Finkelstein EA, Khavjou O, Gustafson A. Cost effectiveness of internet
- 41 interventions: review and recommendations. *Ann Behav Med*. 2009;38(1):40-5.
- 42
- 43 36. van der Meij E, Anema JR, Otten RH, Huirne JA, Schaafsma FG. The Effect of
- 44 Perioperative E-Health Interventions on the Postoperative Course: A Systematic
- 45 Review of Randomised and Non-Randomised Controlled Trials. *PLoS One*.
- 46 2016;11(7):e0158612.
- 47
- 48
- 49
- 50
- 51
- 52
- 53
- 54
- 55
- 56
- 57
- 58
- 59
- 60

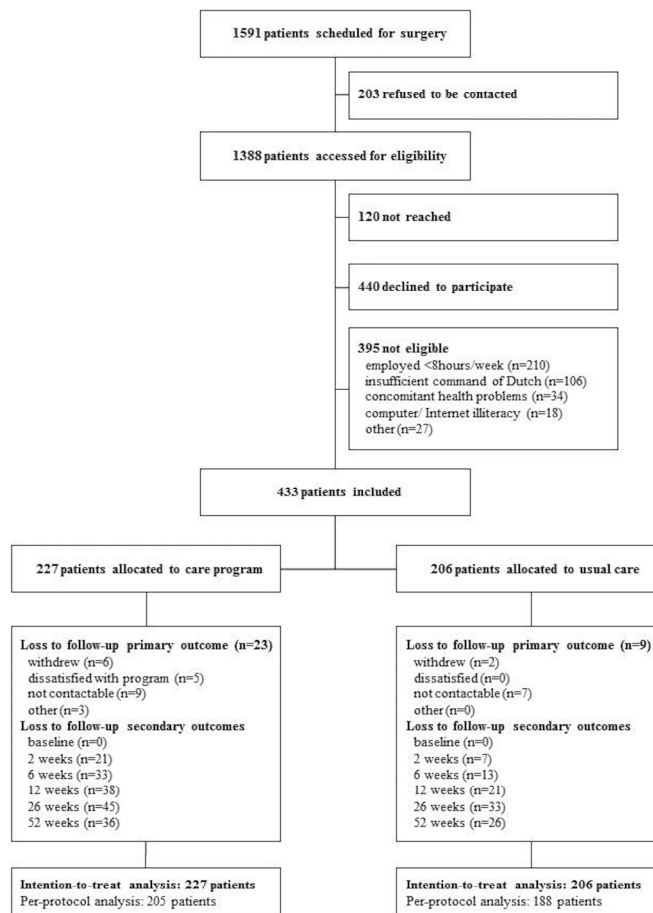**Figure 1** Trial profile

201x218mm (300 x 300 DPI)

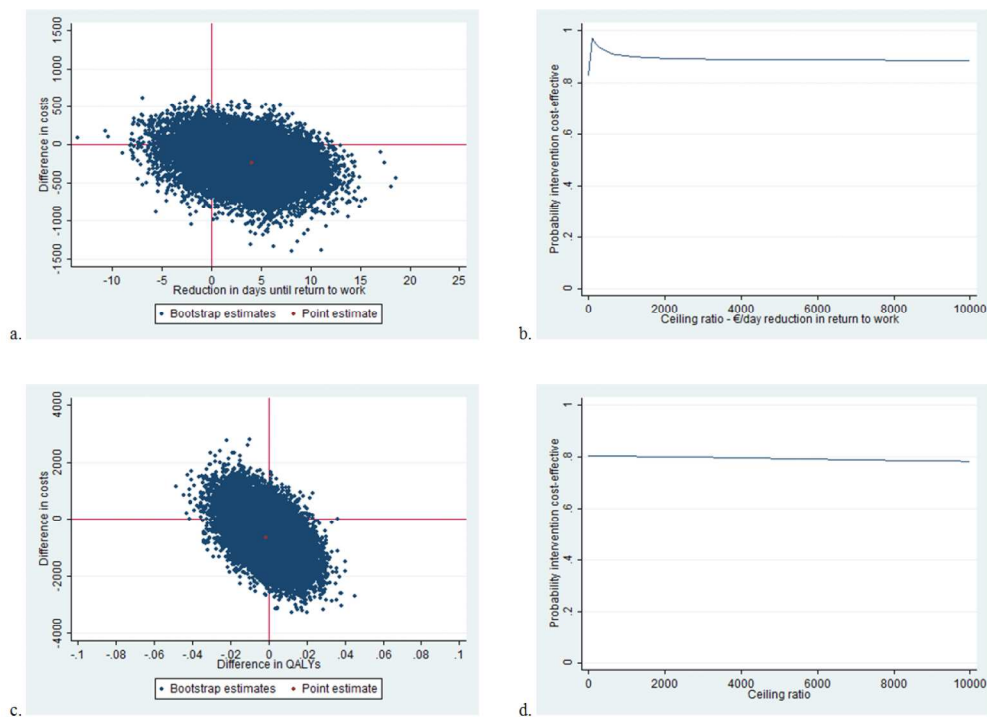

**Figure 2** Cost-effectiveness planes and cost-effectiveness acceptability curves for RTW and QALYs. !! † Legend: The cost-effectiveness planes (a,c) indicate the uncertainty around the incremental cost-effectiveness ratio. The cost-effectiveness acceptability curves (b,d) indicate the probability of cost-effectiveness for different values (€) of willingness to pay per unit of effect gained. RTW, return to work; QALY, Quality Adjusted Life Year.

441x321mm (300 x 300 DPI)



**Supplementary table S1** Costs of the intervention care programme from the societal perspective, valued using a bottom-up micro-costing approach

| Intervention component                | Cost category     | Staff                   | Units      | Unit Price | Total costs (n=227) | Costs per patient |
|---------------------------------------|-------------------|-------------------------|------------|------------|---------------------|-------------------|
| <b>Implementation costs</b>           |                   |                         |            |            |                     |                   |
| Training sessions<br>(care-managers)  | labour costs      | principal investigator  | 5 hours    | € 36.94    | € 184.69            | € 0.81            |
|                                       | labour costs      | occupational physicians | 18 hours   | € 89.68    | € 1,614.24          | € 7.11            |
|                                       | labour costs      | occupational therapist  | 2 hours    | € 46.32    | € 92.64             | € 0.41            |
|                                       | capital costs     |                         | 5 hours    | € 6.26     | € 31.29             | € 0.14            |
| Training sessions<br>(hospital staff) | labour costs      | principal investigator  | 38 hours   | € 36.94    | € 1,403.67          | € 6.18            |
|                                       | travel costs      | principal investigator  | 582 km     | € 0.22     | € 127.28            | € 0.56            |
|                                       | labour costs      | gynaecologists          | 18.9 hours | € 107.30   | € 2,027.90          | € 8.93            |
|                                       | labour costs      | residents               | 18.9 hours | € 42.58    | € 804.82            | € 3.55            |
|                                       | labour costs      | nurses                  | 45 hours   | € 42.64    | € 1,918.58          | € 8.45            |
|                                       | capital costs     |                         | 9 hours    | € 6.26     | € 56.33             | € 0.25            |
|                                       | printed materials |                         |            |            | € 821.00            | € 3.62            |
|                                       |                   |                         |            |            | <b>Subtotal</b>     | <b>€ 40.01</b>    |
| <b>eHealth intervention</b>           |                   |                         |            |            |                     |                   |
| Electronic approval                   | labour costs      | gynaecologists          | 14.2 hours | € 107.30   | € 1,523.60          | € 6.71            |
|                                       | capital costs     |                         | 14.2 hours | € 4.17     | € 59.15             | € 0.26            |
| Maintenance                           | labour costs      | computer specialist     | 12.2 hours | € 37.82    | € 461.45            | € 2.03            |
|                                       | capital costs     |                         | 12.2 hours | € 1.67     | € 20.33             | € 0.09            |
| Administrator time                    | labour costs      | research assistant      | 37.8 hours | € 33.42    | € 1,263.23          | € 5.56            |
|                                       | capital costs     |                         | 37.8 hours | € 4.17     | € 157.46            | € 0.69            |
| Website hosting                       | other             |                         | 40 months  | € 18.84    | € 578.88            | € 2.55            |
|                                       |                   |                         |            |            | <b>Subtotal</b>     | <b>€ 17.90</b>    |
| <b>Occupational intervention</b>      |                   |                         |            |            |                     |                   |
| Pre-operative consultations           | labour costs      | occupational physicians | 7.9 hours  | € 89.68    | € 708.47            | € 3.12            |



|                                 |               |                         |              |         |                 |                     |
|---------------------------------|---------------|-------------------------|--------------|---------|-----------------|---------------------|
|                                 | capital costs |                         | 7.9 hours    | € 4.17  | € 32.91         | € 0.14              |
|                                 | phone costs   |                         | 413 minutes  | € 0.09  | € 38.71         | € 0.17              |
| Post-operative consultations    | labour costs  | occupational physicians | 37.5 hours   | € 89.68 | € 3.363.00      | € 14.81             |
|                                 | capital costs |                         | 37.5 hours   | € 4.17  | € 156.21        | € 0.69              |
|                                 | phone costs   |                         | 2083 minutes | € 0.09  | € 195.23        | € 0.86              |
| Workplace intervention          | labour costs  | occupational therapist  | 4 hours      | € 46.32 | € 185.29        | € 0.82              |
|                                 | capital costs |                         | 3 hours      | € 6.26  | € 18.78         | € 0.08              |
|                                 | labour costs  | employer                | 2 hours      | € 83.69 | € 167.37        | € 0.74              |
|                                 | travel costs  | occupational therapist  | 110 km       | € 0.22  | € 24.06         | € 0.11              |
|                                 |               |                         |              |         | <b>Subtotal</b> | <b>€ 21.54</b>      |
| <b>Developmental costs</b>      |               |                         |              |         | € 33,873.55     | € 0.56 <sup>§</sup> |
|                                 |               |                         |              |         | <b>Subtotal</b> | <b>€ 0.56</b>       |
| <b>TOTAL intervention costs</b> |               |                         |              |         | <b>€ 80.02</b>  |                     |

Costs are expressed in 2014 Euros (€1.00 = £0.85; \$1.06).

<sup>§</sup> € 33,873.55 was paid for the development of the intervention care-programme. For calculating the development costs per participant, these were divided by the expected number of users during the first five years after implementation (60,200). Per year 20,000 gynaecologic surgeries (LAS, TLH, VH, AH) are being performed in the Netherlands and based on the outcomes of an earlier performed process-evaluation we hypothesized a reach of 60.2%.<sup>42</sup>

**Supplementary table S2** Differences in pooled means costs and effects, incremental cost-effectiveness ratios and the distribution of incremental cost-effectiveness pairs around the quadrants of the cost-effectiveness plane

| Analysis                              | Sample size |     | $\Delta$ Cost* (€)<br>mean (95% CI) | $\Delta$ Effect* (days)<br>mean (95% CI) | ICER<br>€/day | Distribution CE-plane |                 |                 |                 |  |
|---------------------------------------|-------------|-----|-------------------------------------|------------------------------------------|---------------|-----------------------|-----------------|-----------------|-----------------|--|
|                                       | IC          | UC  |                                     |                                          |               | NE <sup>1</sup>       | SE <sup>2</sup> | SW <sup>3</sup> | NW <sup>4</sup> |  |
| <b>QALYs</b>                          |             |     |                                     |                                          |               |                       |                 |                 |                 |  |
| Intention to treat                    | 227         | 206 | -647 (-2116 to 735)                 | -0.001 (-0.023 to 0.020)                 | 501187        | 4%                    | 42%             | 35%             | 19%             |  |
| Per-protocol analysis                 | 205         | 188 | -1148 (-2611 to 162)                | 0.003 (-0.019 to 0.024)                  | -432881       | 1%                    | 59%             | 34%             | 6%              |  |
| Complete-case analysis                | 132         | 136 | -1607 (-3421 to 52)                 | 0.009 (-0.013 to 0.033)                  | -202816       | 1%                    | 72%             | 24%             | 3%              |  |
| Friction cost approach                | 227         | 206 | -825 (-2209 to 470)                 | -0.001 (-0.023 to 0.020)                 | 639131        | 2%                    | 44%             | 42%             | 12%             |  |
| Healthcare perspective                | 227         | 206 | -61 (-361 to 218)                   | -0.001 (-0.023 to 0.020)                 | 46942         | 13%                   | 33%             | 28%             | 26%             |  |
| <b>SF-36 PHYSICAL COMPONENT SCORE</b> |             |     |                                     |                                          |               |                       |                 |                 |                 |  |
| Intention to treat                    | 227         | 206 | -647 (-2116 to 735)                 | -0.7 (-2.6 to 1.1)                       | 870           | 6%                    | 19%             | 58%             | 17%             |  |
| Per-protocol analysis                 | 205         | 188 | -1148 (-2611 to 162)                | -0.9 (-2.8 to 1.1)                       | 1350          | 2%                    | 21%             | 71%             | 6%              |  |
| Complete-case analysis                | 153         | 149 | -1689 (-3316 to -231)               | -1.2 (-3.3 to 0.8)                       | 1389          | 0%                    | 12%             | 86%             | 2%              |  |
| Friction cost approach                | 227         | 206 | -825 (-2209 to 470)                 | -0.7 (-2.6 to 1.1)                       | 1109          | 4%                    | 21%             | 64%             | 11%             |  |
| Healthcare perspective                | 227         | 206 | -61 (-361 to 218)                   | -0.7 (-2.6 to 1.1)                       | 81            | 8%                    | 17%             | 44%             | 31%             |  |
| <b>SF-36 MENTAL COMPONENT SCALE</b>   |             |     |                                     |                                          |               |                       |                 |                 |                 |  |
| Intention to treat                    | 227         | 206 | -647 (-2116 to 735)                 | -0.4 (-2.5 to 1.7)                       | 1573          | 10%                   | 33%             | 44%             | 13%             |  |
| Per-protocol analysis                 | 205         | 188 | -1148 (-2611 to 162)                | -0.5 (-2.7 to 1.7)                       | 2198          | 2%                    | 32%             | 61%             | 5%              |  |
| Complete-case analysis                | 153         | 149 | -1689 (-3316 to -231)               | -0.1 (-2.6 to 1.9)                       | 12598         | 1%                    | 49%             | 49%             | 1%              |  |
| Friction cost approach                | 227         | 206 | -825 (-2209 to 470)                 | -0.4 (-2.5 to 1.7)                       | 2006          | 6%                    | 37%             | 49%             | 8%              |  |
| Healthcare perspective                | 227         | 206 | -61 (-361 to 218)                   | -0.4 (-2.5 to 1.7)                       | 147           | 17%                   | 26%             | 35%             | 22%             |  |
| <b>RECOVERY INDEX</b>                 |             |     |                                     |                                          |               |                       |                 |                 |                 |  |
| Intention to treat                    | 227         | 206 | -647 (-2116 to 735)                 | -0.6 (-2.0 to 0.9)                       | 1127          | 5%                    | 22%             | 55%             | 18%             |  |
| Per-protocol analysis                 | 205         | 188 | -1148 (-2611 to 162)                | -0.7 (-2.1 to 0.8)                       | 1786          | 1%                    | 23%             | 70%             | 6%              |  |
| Complete-case analysis                | 153         | 149 | -1689 (-3316 to -231)               | -0.7 (-2.2 to 0.7)                       | 2562          | 1%                    | 20%             | 78%             | 1%              |  |
| Friction cost approach                | 227         | 206 | -825 (-2209 to 470)                 | -0.6 (-2.0 to 0.9)                       | 1437          | 3%                    | 24%             | 62%             | 12%             |  |
| Healthcare perspective                | 227         | 206 | -61 (-361 to 218)                   | -0.6 (-2.0 to 0.9)                       | 106           | 8%                    | 19%             | 42%             | 31%             |  |

---

\* uncertainty estimated using bootstrapping and corrected for clustering by hospital and type of surgery

<sup>1</sup> Refers to the northeast quadrant of the CE-plane, indicating that the intervention care programme is more effective and more costly than usual care.

<sup>2</sup> Refers to the southeast quadrant of the CE-plane, indicating that the intervention care programme is more effective and less costly than usual care.

<sup>3</sup> Refers to the southwest quadrant of the CE-plane, indicating that the intervention care programme is less effective and less costly than usual care.

<sup>4</sup> Refers to the northwest quadrant of the CE-plane, indicating that the intervention care programme is less effective and more costly than usual care.

IC, intervention care; UC, usual care; ICER, Incremental Cost-effectiveness Ratio; CE plane, cost-effectiveness plane.

---

## CHEERS checklist

| Section/item                    | Item No | Recommendation                                                                                                                                                                             | Reported on page No/line No                                  |
|---------------------------------|---------|--------------------------------------------------------------------------------------------------------------------------------------------------------------------------------------------|--------------------------------------------------------------|
| <i>Title and abstract</i>       |         |                                                                                                                                                                                            |                                                              |
| Title                           | 1       | Identify the study as an economic evaluation or use more specific terms such as “cost-effectiveness analysis”, and describe the interventions compared.                                    | page 1, line 6.                                              |
| Abstract                        | 2       | Provide a structured summary of objectives, perspective, setting, methods (including study design and inputs), results (including base case and uncertainty analyses), and conclusions.    | page 2, line 3 to 28.                                        |
| <i>Introduction</i>             |         |                                                                                                                                                                                            |                                                              |
| Background and objectives       | 3       | Provide an explicit statement of the broader context for the study.<br>Present the study question and its relevance for health policy or practice decisions.                               | page 3, line 4 to 14;<br>page 3, line 14 to 22.              |
| <i>Methods</i>                  |         |                                                                                                                                                                                            |                                                              |
| Target population and subgroups | 4       | Describe characteristics of the base case population and subgroups analysed, including why they were chosen.                                                                               | page 5, line 4 to 9;<br>page 9, line 9 to 17.                |
| Setting and location            | 5       | State relevant aspects of the system(s) in which the decision(s) need(s) to be made.                                                                                                       | page 4, line 33 to page 5, line 2.                           |
| Study perspective               | 6       | Describe the perspective of the study and relate this to the costs being evaluated.                                                                                                        | page 4, line 26 to 28.                                       |
| Comparators                     | 7       | Describe the interventions or strategies being compared and state why they were chosen.                                                                                                    | page 5, line 21 to page 6, line 9;<br>page 6, line 11 to 18. |
| Time horizon                    | 8       | State the time horizon(s) over which costs and consequences are being evaluated and say why appropriate.                                                                                   | page 4, line 29 to 30;<br>page 8, line 12 to 13.             |
| Discount rate                   | 9       | Report the choice of discount rate(s) used for costs and outcomes and say why appropriate.                                                                                                 | page 8, line 12 to 13.                                       |
| Choice of health outcomes       | 10      | Describe what outcomes were used as the measure(s) of benefit in the evaluation and their relevance for the type of analysis performed.                                                    | page 6, line 21 to 33.                                       |
| Measurement of effectiveness    | 11a     | <i>Single study-based estimates:</i> Describe fully the design features of the single effectiveness study and why the single study was a sufficient source of clinical effectiveness data. | page 4, line 25 to 28;<br>page 5, line 22 to page 6, line 9. |

| Section/item                                           | Item No | Recommendation                                                                                                                                                                                                                                                                                                                                        | Reported on page No/line No                    |
|--------------------------------------------------------|---------|-------------------------------------------------------------------------------------------------------------------------------------------------------------------------------------------------------------------------------------------------------------------------------------------------------------------------------------------------------|------------------------------------------------|
| Measurement and valuation of preference based outcomes | 12      | If applicable, describe the population and methods used to elicit preferences for outcomes.                                                                                                                                                                                                                                                           | n/a                                            |
| Estimating costs and resources                         | 13a     | <i>Single study-based economic evaluation:</i> Describe approaches used to estimate resource use associated with the alternative interventions. Describe primary or secondary research methods for valuing each resource item in terms of its unit cost. Describe any adjustments made to approximate to opportunity costs.                           | page 7, line 1 to 24.                          |
| Currency, price date and conversion                    | 14      | Report the dates of the estimated resource quantities and unit costs. Describe methods for adjusting estimated unit costs to the year of reported costs if necessary. Describe methods for converting costs into a common currency base and the exchange rate.                                                                                        | page 8, line 12 to 13; table 2.                |
| Choice of model                                        | 15      | Describe and give reasons for the specific type of decision-analytical model used. Providing a figure to show model structure is strongly recommended.                                                                                                                                                                                                | Page 8, line 25 to 32.                         |
| Assumptions                                            | 16      | Describe all structural or other assumptions underpinning the decision-analytical model.                                                                                                                                                                                                                                                              | page 8, line 18 to 23.                         |
| Analytical methods                                     | 17      | Describe all analytical methods supporting the evaluation. This could include methods for dealing with skewed, missing, or censored data; extrapolation methods; methods for pooling data; approaches to validate or make adjustments (such as half cycle corrections) to a model; and methods for handling population heterogeneity and uncertainty. | page 8, line 18 to 23; page 9, line 1 to 7.    |
| <b>Results</b>                                         |         |                                                                                                                                                                                                                                                                                                                                                       |                                                |
| Study parameters                                       | 18      | Report the values, ranges, references, and, if used, probability distributions for all parameters. Report reasons or sources for distributions used to represent uncertainty where appropriate. Providing a table to show the input values is strongly recommended.                                                                                   | page 10, line 1 to 19; table 2 and 3; table S1 |
| Incremental costs and outcomes                         | 19      | For each intervention, report mean values for the main categories of estimated costs and outcomes of interest, as well as mean differences between the comparator groups. If applicable, report incremental cost-effectiveness ratios.                                                                                                                | page 10, line 22 to page 11, line 12; table 4; |
| Characterising uncertainty                             | 20a     | <i>Single study-based economic evaluation:</i> Describe the effects of sampling uncertainty for the estimated incremental cost and incremental effectiveness parameters, together with the impact of methodological assumptions (such as discount rate, study perspective).                                                                           | page 11, line 14 to 23.                        |

| Section/item                                                         | Item No | Recommendation                                                                                                                                                                                                                                                             | Reported on page No/line No                                   |
|----------------------------------------------------------------------|---------|----------------------------------------------------------------------------------------------------------------------------------------------------------------------------------------------------------------------------------------------------------------------------|---------------------------------------------------------------|
| Characterising heterogeneity                                         | 21      | If applicable, report differences in costs, outcomes, or cost-effectiveness that can be explained by variations between subgroups of patients with different baseline characteristics or other observed variability in effects that are not reducible by more information. | page 11, line 25 to page 12, line 12; page 13, line 19 to 27. |
| <i>Discussion</i>                                                    |         |                                                                                                                                                                                                                                                                            |                                                               |
| Study findings, limitations, generalisability, and current knowledge | 22      | Summarise key study findings and describe how they support the conclusions reached. Discuss limitations and the generalisability of the findings and how the findings fit with current knowledge.                                                                          | page 12, line 14 to page 14, line 21; page 15, line 20 to 30. |
| <i>Other</i>                                                         |         |                                                                                                                                                                                                                                                                            |                                                               |
| Source of funding                                                    | 23      | Describe how the study was funded and the role of the funder in the identification, design, conduct, and reporting of the analysis. Describe other non-monetary sources of support.                                                                                        | page 16, line 20 to 25.                                       |
| Conflicts of interest                                                | 24      | Describe any potential for conflict of interest of study contributors in accordance with journal policy. In the absence of a journal policy, we recommend authors comply with International Committee of Medical Journal Editors recommendations.                          | page 16, line 27 to page 17, line 2.                          |

# BMJ Open

## Cost-effectiveness of an Internet-based perioperative care programme to enhance postoperative recovery in gynaecological patients: economic evaluation alongside a stepped-wedge cluster-randomised trial

|                                 |                                                                                                                                                                                                                                                                                                                                                                                                                                                                                                                                                                                                                                                                                                                                                                                                                                             |
|---------------------------------|---------------------------------------------------------------------------------------------------------------------------------------------------------------------------------------------------------------------------------------------------------------------------------------------------------------------------------------------------------------------------------------------------------------------------------------------------------------------------------------------------------------------------------------------------------------------------------------------------------------------------------------------------------------------------------------------------------------------------------------------------------------------------------------------------------------------------------------------|
| Journal:                        | <i>BMJ Open</i>                                                                                                                                                                                                                                                                                                                                                                                                                                                                                                                                                                                                                                                                                                                                                                                                                             |
| Manuscript ID                   | bmjopen-2017-017782.R2                                                                                                                                                                                                                                                                                                                                                                                                                                                                                                                                                                                                                                                                                                                                                                                                                      |
| Article Type:                   | Research                                                                                                                                                                                                                                                                                                                                                                                                                                                                                                                                                                                                                                                                                                                                                                                                                                    |
| Date Submitted by the Author:   | 30-Oct-2017                                                                                                                                                                                                                                                                                                                                                                                                                                                                                                                                                                                                                                                                                                                                                                                                                                 |
| Complete List of Authors:       | Bouwsma, Esther; VU University Medical Center, Department of Obstetrics and Gynaecology; EMGO Institute for Health and Care Research<br>Bosmans, J; VU University Amsterdam, Department of Health Sciences, Faculty of Earth and Life Sciences; EMGO Institute for Health and Care Research<br>van Dongen, Johanna M.; VU University Amsterdam, Department of Health Sciences, Faculty of Earth and Life Sciences; EMGO Institute for Health and Care Research<br>Brölmann, Hans; VU University Medical Center, Department of Obstetrics and Gynaecology<br>Anema, Johannes; VU University Medical Center, Department of Public and Occupational Health; EMGO Institute for Health and Care Research<br>Huirne, Judith; VU University Medical Center, Department of Obstetrics and Gynaecology; EMGO Institute for Health and Care Research |
| <b>Primary Subject Heading</b>: | Obstetrics and gynaecology                                                                                                                                                                                                                                                                                                                                                                                                                                                                                                                                                                                                                                                                                                                                                                                                                  |
| Secondary Subject Heading:      | Health economics, Surgery                                                                                                                                                                                                                                                                                                                                                                                                                                                                                                                                                                                                                                                                                                                                                                                                                   |
| Keywords:                       | GYNAECOLOGY, Telemedicine < BIOTECHNOLOGY & BIOINFORMATICS, Minimally invasive surgery < GYNAECOLOGY, HEALTH ECONOMICS, Organisation of health services < HEALTH SERVICES ADMINISTRATION & MANAGEMENT, OCCUPATIONAL & INDUSTRIAL MEDICINE                                                                                                                                                                                                                                                                                                                                                                                                                                                                                                                                                                                                   |
|                                 |                                                                                                                                                                                                                                                                                                                                                                                                                                                                                                                                                                                                                                                                                                                                                                                                                                             |

SCHOLARONE™  
Manuscripts

1  
2  
3 **Title Page**  
4

5  
6 **Full title:**  
7

8 **Cost-effectiveness of an Internet-based perioperative care programme to enhance**  
9 **postoperative recovery in gynaecological patients: economic evaluation alongside a**  
10 **stepped-wedge cluster-randomised trial**  
11

12  
13  
14 **Authors:**  
15

16 Esther V A Bouwsma<sup>1,2,3</sup>, Judith E Bosmans<sup>3,4</sup>, Johanna M van Dongen<sup>3,4</sup>, Hans A M  
17 Brölmann<sup>1</sup>, Johannes R Anema<sup>2,3</sup>, Judith A F Huirne<sup>1,3</sup>  
18  
19

20  
21 **Affiliations:**  
22

- 23 1. Department of Obstetrics and Gynaecology, VU University Medical Center, Amsterdam,  
24 Netherlands  
25  
26 2. Department of Public and Occupational Health, VU University Medical Center,  
27 Amsterdam, Netherlands  
28  
29 3. EMGO Institute for Health and Care Research, Amsterdam, the Netherlands  
30  
31 4. Department of Health Sciences, Faculty of Earth and Life Sciences, VU University  
32 Amsterdam, Amsterdam, Netherlands  
33  
34

35  
36 **Correspondence to:**  
37

38 J.A.F. Huirne

39 [j.huirne@vumc.nl](mailto:j.huirne@vumc.nl)  
40  
41

42  
43 **Corresponding author during the review process:**  
44

45 E.V.A. Bouwsma

46 [ev.bouwsma@vumc.nl](mailto:ev.bouwsma@vumc.nl)  
47  
48  
49  
50  
51  
52  
53  
54  
55  
56  
57  
58  
59  
60



## **Abstract**

**Objectives** To evaluate the cost-effectiveness and cost-utility of an Internet-based perioperative care programme compared with usual care for gynaecological patients.

**Design** Economic evaluation from a societal perspective alongside a stepped-wedge cluster-randomised controlled trial with 12 months follow-up.

**Setting** Secondary care, nine hospitals in the Netherlands, 2011-2014.

**Participants** 433 employed women aged 18-65 scheduled for a hysterectomy and/or laparoscopic adnexal surgery.

**Intervention** The intervention comprised an Internet-based care programme aimed at improving convalescence and preventing delayed return to work following gynaecological surgery was sequentially rolled out. Depending on the implementation phase of their hospital, patients were allocated to usual care (n=206) or to the intervention (n=227).

**Main outcome measures** The primary outcome was duration until full sustainable return to work (RTW). Secondary outcomes were quality adjusted life years (QALYs), health-related quality of life and recovery.

**Results** At 12 months, there were no statistically significant differences in total societal costs (€-647; 95% CI €-2116 to €753) and duration until RTW (-4.1; 95% CI -10.8 to 2.6) between groups. The incremental cost-effectiveness ratio (ICER) for RTW was 56; each day earlier RTW in the intervention group was associated with cost savings of 56 euros compared to usual care. The probability of the intervention being cost-effective was 0.79 at a willingness-to-pay (WTP) of €0 per day earlier RTW, which increased to 0.97 at a WTP of €76 per day earlier RTW. The difference in QALYs gained over 12 months between the groups was clinically irrelevant resulting in a low probability of cost-effectiveness for QALYs.

**Conclusions** Considering that on average the costs of a day of sickness absence are €230, the care programme is considered cost-effective in comparison with usual care for duration until sustainable RTW after gynaecological surgery for benign disease. Future research should indicate whether widespread implementation of this care programme has the potential to reduce societal costs associated with gynaecological surgery.

**Trial registration** Netherlands National Trial Register NTR2933.

**Key words** gynaecology; Internet; telemedicine; self-management; convalescence; return to work; economic evaluation.

### **Strengths and limitations of this study**

- This is the first economic evaluation on an Internet-based care programme aimed at improving convalescence and preventing delayed return to work following gynaecological surgery.
- The study was conducted alongside a cluster-randomised controlled trial allowing prospective collection of relevant cost and effect data.
- The study was performed from a societal perspective and costs associated with lost productivity included both absenteeism as well as presenteeism costs.
- A latent barrier to future acceptance and implementation of the care programme lies in the fact that the costs and benefits of the care programme are separated between different types of stakeholders.

## **Main document**

### **Introduction**

At present, there is a transition of perioperative care from the hospital setting towards the home environment.<sup>1-4</sup> The introduction of advanced surgical techniques in combination with the implementation of “fast-track” clinical pathways have considerably reduced the length of postoperative hospital stays and many (complex) surgeries are now being performed in an ambulatory setting.<sup>5-7</sup> This is beneficial from the perspective of the healthcare system, as it leads to the containment of healthcare costs.<sup>1, 8</sup>

However, costs associated with lost productivity following surgery contribute to the total societal costs of surgical procedures as well, and are mostly not taken into account. Moreover, there is considerable evidence that the duration of sick leave following gynaecological surgery generally exceeds the period considered appropriate by specialists.<sup>9</sup> Therefore, preventing unnecessary prolonged recovery following gynaecological surgery, may translate into considerable savings for society.

We developed an Internet-based care programme for patients undergoing gynaecological surgery for benign disease, aimed at facilitating recovery after discharge and preventing delayed return to work.<sup>10, 11</sup> In this paper, we report on the cost-effectiveness and cost-utility of the Internet-based care programme compared to usual care. The findings on clinical effectiveness were reported in a separate paper.

### **Methods**

#### ***Study design and participants***

This economic evaluation was performed from a societal perspective and was carried out alongside a stepped-wedge cluster randomised controlled trial comparing an Internet-based care programme with usual care for patients undergoing benign gynaecological surgery. The study was done in the Netherlands between October 2011 and July 2014. The follow-up period was 12 months. The trial protocol has been published previously in accordance to CONSORT extended guidelines.<sup>9</sup>

The clusters in this trial were formed by separate hospitals. A total of nine hospitals participated, which were selected before the start of the trial. Hospitals were eligible if they

1  
2  
3 performed at least 100 hysterectomies or laparoscopic adnexal surgeries annually, and were  
4 located within 50km of the VU medical centre, Amsterdam, the Netherlands.  
5  
6

7  
8 Patients were recruited from the waiting lists for hysterectomy (abdominal, vaginal or  
9 laparoscopic) and laparoscopic adnexal surgery. Eligible participants were women aged 18-65  
10 who were employed for at least eight hours a week (unpaid or paid employment, or self-  
11 employed). We excluded patients who had severe benign comorbidity, had a malignancy,  
12 were pregnant, were computer or Internet illiterate, were involved in a lawsuit against their  
13 employer, were on disability sick leave before surgery, or had insufficient command of Dutch.  
14  
15  
16  
17  
18

### 19 ***Randomisation and blinding***

20  
21 Randomization took place at the level of the clusters and determined the order in which the  
22 intervention was implemented in the participating hospitals. The sequence was generated by a  
23 statistician using a computer generated list of random numbers. A stepped wedge approach  
24 was employed as it enabled us to study the implementation process as well.<sup>9</sup>  
25  
26  
27  
28

29  
30 Patients, clinicians and researchers could not be blinded for the intervention. However, group  
31 allocation was concealed until patients had agreed to participate and provided written  
32 informed consent. Data analysts (EB, JB) were masked to group allocation.  
33  
34  
35

### 36 ***Intervention care programme and implementation strategy***

37  
38 The development and content of the intervention care programme have been described  
39 elsewhere in more detail.<sup>9, 11</sup> A multi-faceted implementation strategy was employed to  
40 achieve maximal adoption of the care programme, targeting three different levels.  
41  
42  
43  
44

45  
46 At the level of the organization, the structure of healthcare was changed by the introduction of  
47 the interactive web portal that was accessible for patients as well as their healthcare  
48 professionals. In addition, care managers were trained to help patients identify possible  
49 barriers to resuming work activities and could assist, if necessary, in the planning and  
50 execution of work resumption, before and after surgery.  
51  
52  
53

54  
55 At the level of the healthcare professional, educational training sessions were organised to  
56 introduce an earlier developed guideline on postoperative convalescence recommendations to  
57 stimulate evidence-based patient education.<sup>10</sup>  
58  
59  
60

1  
2  
3  
4  
5 At the patient level, the care programme consisted of two steps. First, all participants allocated  
6 to the intervention group received access to the web portal several weeks prior to their surgery  
7 (eHealth intervention). The interactive web portal facilitated self-management by providing  
8 patients with individual tailored convalescence recommendations throughout the entire  
9 surgical pathway as well as monitoring recovery postoperatively through an interactive self-  
10 assessment tool. Second, for those patients at risk of prolonged sick leave, a care manager was  
11 available to provide additional guidance in the process of resuming work activities  
12 (occupational intervention).  
13  
14  
15  
16  
17  
18

### 19 *Usual Care*

20 Before the care programme was implemented in the hospitals, participating patients received  
21 usual care. Although considerable variation in usual care exists in the Netherlands,  
22 postoperative patients generally receive verbal instructions at discharge by a nurse and/or  
23 physician, sometimes accompanied by a letter or brochure. Usually, a postoperative  
24 consultation is planned six weeks after surgery. Due to Dutch legislation, employed patients  
25 who do not resume work within 6 weeks after the surgery are invited for a consultation with  
26 their occupational physician.  
27  
28  
29  
30  
31  
32  
33

### 34 *Main outcome measures*

35 The primary outcome was duration until sustainable return to work (RTW) defined as the  
36 resumption of own work or other work with equal earnings, for at least 4 weeks without  
37 (partial or full) recurrence of sick leave. This definition was adopted as interventions aimed at  
38 expediting return to work of sick-listed employees should also aim at reducing recurrence of  
39 sickness absence in order to sustain employees at work after initial RTW. Data on return to  
40 work were collected by means of monthly electronic sick leave calendars.  
41  
42  
43  
44  
45  
46  
47

48 Quality adjusted life years (QALYs) was one of the secondary outcomes and was measured  
49 using the Dutch version of the EuroQol five-dimensional questionnaire (EQ-5D-3L).<sup>12</sup> The  
50 Dutch tariff was used to estimate the utility of EQ-5D-3L health states.<sup>13</sup> QALYs were  
51 calculated by multiplying the utility with the amount of time a patient spent in a particular  
52 health state. Transitions between health states were linearly interpolated. Other secondary  
53 outcomes included health-related quality of life assessed by Short-Form Health Survey (SF-  
54  
55  
56  
57  
58  
59  
60

1  
2  
3 36)<sup>14</sup>, and recovery assessed by the Recovery Index (RI-10).<sup>15</sup> All secondary outcomes were  
4 assessed at baseline, and at 2, 6, 12, 26, and 52 weeks follow-up.  
5  
6

### 7 8 *Service use and costs*

9  
10 The intervention and implementation strategy costs consisted of costs related to implementing  
11 the new care programme. A bottom-up micro-costing approach was used for estimating  
12 intervention costs, using detailed data regarding the quantity and unit prices of: (1) the  
13 training sessions of involved healthcare professionals (clinical staff, occupational physicians,  
14 occupational therapist), (2) the eHealth intervention (hosting of web portal, administrator  
15 time), and (3) the occupational intervention (number and duration of consultations).<sup>16</sup>  
16  
17  
18  
19

20  
21 Data on healthcare services used and support received by the participants were collected using  
22 electronic questionnaires during one year. Each month, the patient was asked to report service  
23 use over the previous month. Patients who were not sick listed and did not have any  
24 healthcare costs during three consecutive months, received a shortened version of the  
25 questionnaire. In case of no response, electronic reminders were sent after one and two weeks.  
26 If participants did not respond to the electronic reminders either, an additional attempt was  
27 made to complete the missing data per email, mail or telephone every three months.  
28  
29  
30  
31  
32  
33

34  
35 Only healthcare utilization and support related to the gynaecological surgery were collected,  
36 and included the following categories: surgery and initial hospitalization, primary and  
37 secondary care including complementary medicine, medication and medical aids, home care  
38 and informal help.  
39  
40  
41

42  
43 Service utilization was valued using Dutch standard costs.<sup>17</sup> If these were unavailable, prices  
44 according to professional organizations were used. The prices of prescribed drugs were  
45 estimated using the prices of the Royal Dutch Society for Pharmacy.<sup>18</sup>  
46  
47  
48

### 49 *Productivity Loss*

50  
51 Absenteeism costs were calculated using the Human Capital Approach (HCA). The net  
52 number of sick leave days during follow-up were multiplied by the estimated costs of one day  
53 of sick leave for females, stratified for age.<sup>17</sup> In case of partial sick leave, we assumed that  
54 participants were 100% productive during the hours of partial work resumption.  
55  
56  
57  
58  
59  
60

1  
2  
3 Presenteeism (i.e. reduced productivity while at work) was assessed monthly after full  
4 resumption of work using two items of the “Productivity and Disease Questionnaire”  
5 (PRODISQ).<sup>19</sup> Patients were asked to report the quantity (q1) and quality (q2) of the work  
6 performed during the latest day at work on an 11-point scale, ranging from “nothing/very bad  
7 quality” (0) to “same as normal”(10).  
8  
9  
10

11  
12 The level of presenteeism (Pres<sub>day</sub>) on the latest day at work was calculated using the  
13 following formula:  $Pres_{day} = (1 - ((q1 * q2) / 100))$ .<sup>19, 20</sup> Assuming linearity, the level of  
14 presenteeism on the latest day at work was then extrapolated over the total month. The total  
15 number of workdays lost due to presenteeism were calculated (Pres<sub>month</sub>) by multiplying the  
16 participants’ presenteeism level by their number of days worked during that month.  
17  
18 Subsequently, presenteeism costs per month were calculated by multiplying Pres<sub>month</sub>, by the  
19 estimated costs of one day of lost productivity.  
20  
21  
22  
23  
24  
25

26 The index year of the study was 2014. Discounting of costs was not necessary because the  
27 follow-up was one year.<sup>21</sup>  
28  
29  
30

### 31 *Statistical analysis*

32 The sample size of the study (n=454) was calculated for detecting a relevant difference in  
33 return to work (hazard ratio (HR) of 1.5) in the main outcome study.<sup>9</sup> The economic  
34 evaluation was done according to the intention to treat principle. Missing cost and effect data  
35 during follow-up were imputed using multiple imputation by chained equations (MICE).  
36 Multiple imputation was done using SPSS 16.0 with predictive mean matching. An  
37 imputation model containing demographic and prognostic variables was used to create five  
38 complete datasets after which the loss of efficiency was smaller than 5%.<sup>22</sup> Rubin’s rules were  
39 used to pool effects and costs from the five imputed datasets.<sup>23</sup>  
40  
41  
42  
43  
44  
45  
46  
47

48 Differences in costs and effects were estimated using linear multilevel regression analyses,  
49 while adjusting for type of surgery. Clustering at the hospital- and patient-level was accounted  
50 for in these multilevel models. For the cost-effectiveness and cost-utility analyses, we  
51 calculated incremental cost-effectiveness ratios (ICERs) by dividing the incremental costs by  
52 the incremental effects. The ICER indicates the additional investments needed for the  
53 intervention to gain one extra unit of effect compared with usual care. In the ICER for  
54  
55  
56  
57  
58  
59  
60



1  
2  
3 duration until RTW, productivity costs due to sick leave were excluded from the cost  
4 estimates to avoid double counting.  
5  
6

7  
8 We used non-parametric bootstrapping with 5000 replications to estimate 95% confidence  
9 intervals around cost differences and the uncertainty surrounding the ICERs.<sup>24</sup> To account for  
10 the clustering of data, bootstrap replications were stratified for hospital.<sup>25</sup> Bootstrapped cost-  
11 effect pairs were plotted on cost-effectiveness planes (CE planes) and used to estimate cost-  
12 effectiveness acceptability curves (CEA curves). CEA curves show the probability that a  
13 treatment is cost effective in comparison with the control treatment at a specific ceiling ratio,  
14 which is the amount of money society is willing to pay to gain one extra unit of effect.  
15  
16  
17  
18  
19

### 20 21 *Sensitivity analyses*

22 To assess whether protocol deviations influenced the treatment effect, a per-protocol analysis  
23 was performed. In addition, to assess the robustness of the results, we carried out three  
24 sensitivity analyses. Firstly, we did a complete-case analysis to assess the cost-effectiveness  
25 of the interventions excluding patients who were lost to follow-up. Secondly, we replicated  
26 the cost-effectiveness analysis using the Friction Cost Approach. The FCA assumes that costs  
27 are limited to the friction period (i.e. the period needed to replace a sick worker). A friction  
28 period of 23 weeks and an elasticity of 0.8 was used. Thirdly, an analysis from the healthcare  
29 perspective was performed including only healthcare costs.  
30  
31  
32  
33  
34  
35

36 All statistical analyses followed a predefined analysis plan and were done in SPSS (version  
37 16.0) and STATA (version 12SE).  
38  
39  
40

## 41 **Results**

### 42 *Participants*

43 During the study period, 1591 patients were scheduled for a hysterectomy and/or laparoscopic  
44 adnexal surgery in the participating hospitals. In total, 433 patients enrolled in the study, 206  
45 patients during the control phase and 227 patients during intervention phase (figure 1).  
46  
47  
48  
49

50  
51 Participants' demographic and prognostic variables are presented in table 1. Complete follow-  
52 up data were obtained from 92.6% of the participants on the primary outcome RTW, from  
53 71.8% on the secondary outcomes, and 70.0% on healthcare utilization. Baseline  
54 characteristics did not differ between participants with and without complete cost data, except  
55  
56  
57  
58  
59  
60



that patients with complete data on healthcare utilization used the Internet more frequently than women with incomplete data.

**Table 1** Baseline characteristics of individual patients

|                                                                                                                                                                                               | Care Programme<br>(n=227) | Usual Care<br>(n=206) |
|-----------------------------------------------------------------------------------------------------------------------------------------------------------------------------------------------|---------------------------|-----------------------|
| <b>Patient characteristics</b>                                                                                                                                                                |                           |                       |
| Age (years $\pm$ SD)                                                                                                                                                                          | 46.1 $\pm$ 7.3            | 45.6 $\pm$ 6.7        |
| Dutch nationality                                                                                                                                                                             | 220 (96.9%)               | 202 (98.1%)           |
| Internet use (days/week)                                                                                                                                                                      |                           |                       |
| < 1                                                                                                                                                                                           | 2 (0.9%)                  | 3 (1.5%)              |
| 1 – 2                                                                                                                                                                                         | 9 (4.0%)                  | 10 (4.9%)             |
| 3 – 5                                                                                                                                                                                         | 45 (19.8%)                | 42 (20.4%)            |
| > 5                                                                                                                                                                                           | 171 (75.3%)               | 151 (73.3%)           |
| Education level *                                                                                                                                                                             |                           |                       |
| Low                                                                                                                                                                                           | 25 (11.0%)                | 17 (8.3%)             |
| Intermediate                                                                                                                                                                                  | 88 (38.8%)                | 100 (48.5%)           |
| High                                                                                                                                                                                          | 114 (50.2%)               | 89 (43.2%)            |
| <b>Surgery-related characteristics</b>                                                                                                                                                        |                           |                       |
| Type of surgery                                                                                                                                                                               |                           |                       |
| Adnexal surgery                                                                                                                                                                               | 74 (32.6%)                | 51 (24.8%)            |
| Laparoscopic hysterectomy                                                                                                                                                                     | 65 (28.6%)                | 50 (24.3%)            |
| Vaginal hysterectomy                                                                                                                                                                          | 36 (15.9%)                | 53 (25.7%)            |
| Abdominal hysterectomy                                                                                                                                                                        | 52 (22.9%)                | 52 (25.2%)            |
| <b>Health-related characteristics</b>                                                                                                                                                         |                           |                       |
| Perceived health status (mean $\pm$ SD)                                                                                                                                                       | 75.8 $\pm$ 16.5           | 76.9 $\pm$ 16.7       |
| <b>Work-related characteristics</b>                                                                                                                                                           |                           |                       |
| Type of work                                                                                                                                                                                  |                           |                       |
| Salary employed                                                                                                                                                                               | 194 (85.5%)               | 175 (85.0%)           |
| Self-employed                                                                                                                                                                                 | 28 (12.3%)                | 28 (13.6%)            |
| Voluntary work                                                                                                                                                                                | 5 (2.2%)                  | 3 (1.5%)              |
| Work hours per week (mean $\pm$ SD)                                                                                                                                                           | 29.7 $\pm$ 9.3            | 28.7 $\pm$ 8.2        |
| Sick leave (3 months before surgery)                                                                                                                                                          |                           |                       |
| Absence from work <sup>§</sup>                                                                                                                                                                | 88 (38.8%)                | 66 (32.0%)            |
| Number of sick leave days (median (IQR))                                                                                                                                                      | 4.0 (2-10)                | 4.5 (2-11)            |
| RTW expectation (long) <sup>†</sup>                                                                                                                                                           | 42 (18.5%)                | 38 (18.4%)            |
| RTW intention (low) <sup>‡</sup>                                                                                                                                                              | 45 (19.8%)                | 67 (32.5%)            |
| Data are number of patients (%), unless otherwise indicated.                                                                                                                                  |                           |                       |
| * Low=preschool, primary school; intermediate=secondary school; high=tertiary school, university, or postgraduate.                                                                            |                           |                       |
| <sup>§</sup> Defined as at least 1 day absence.                                                                                                                                               |                           |                       |
| <sup>†</sup> Defined as expectation longer than 3 weeks for adnexal surgery, longer than 6 weeks for laparoscopic or vaginal hysterectomy, or longer than 8 weeks for abdominal hysterectomy. |                           |                       |
| <sup>‡</sup> Defined as score 4 or 5 (range 1-5).                                                                                                                                             |                           |                       |
| RTW, return to work.                                                                                                                                                                          |                           |                       |

### Service use and costs

Table 2 presents the costs of self-reported service use per category over the 12 months of follow-up stratified by treatment group and the mean cost differences between both groups.

Intervention costs were €80 per participant (online supplementary table S1). Total societal costs per patient were €12,266 in the intervention group and €13,795 in the usual care group. After correction for clustering by hospital and adjustment for surgery type, total societal costs in the intervention group were €647 lower compared to the usual care group, but this difference was not statistically significant (95% CI €-2116 to €753). In both groups, costs related to productivity losses were about two times higher than total healthcare costs. There was no statistical significant differences in healthcare costs between the intervention group and usual care group (€-61; 95% CI €-361 to €218) and lost productivity costs (€-570; 95% CI €-1909 to €692). Only costs for secondary care were significantly lower in the intervention group compared to the usual care group (€-178; 95% CI €-400 to €-31).

**Table 2** Costs associated with self-reported service used across treatment groups at 12 months follow-up

| Cost category                         | Intervention mean (SEM) n=227 | Usual care mean (SEM) n=206 | Mean cost difference (95% CI)* |
|---------------------------------------|-------------------------------|-----------------------------|--------------------------------|
| <b>Healthcare costs</b>               | <b>3823 (99)</b>              | <b>4142 (134)</b>           | <b>-61 (-361 to 218)</b>       |
| Surgery costs                         | 3236 (64)                     | 3413 (58)                   | 34 (-118 to 174)               |
| Primary care costs                    | 179 (24)                      | 167 (30)                    | 14 (-58 to 95)                 |
| Secondary care costs                  | 242 (42)                      | 458 (98)                    | -178 (-400 to -31)             |
| Costs of medication and aids          | 13 (4)                        | 10 (4)                      | 3 (-6 to 11)                   |
| Home help costs                       | 72 (24)                       | 94 (26)                     | -19 (-85 to 45)                |
| Intervention                          | 80 (0)                        | NA                          | 80 (NA)                        |
| <b>Lost productivity costs</b>        | <b>8443 (543)</b>             | <b>9653 (528)</b>           | <b>-570 (-1909 to 692)</b>     |
| Costs of absenteeism from unpaid work | 1845 (224)                    | 2124 (299)                  | -144 (-756 to 282)             |
| Costs of absenteeism from paid work   | 6499 (425)                    | 7281 (344)                  | -424 (-1469 to 578)            |
| Presenteeism costs                    | 99 (78)                       | 248 (127)                   | -154 (-458 to 82)              |
| <b>Total societal costs</b>           | <b>12266 (596)</b>            | <b>13795 (602)</b>          | <b>-647 (-2116 to 735)</b>     |

Costs are expressed in 2014 Euros (€1.00 = £0.85; \$1.06).

Mean values summarize the costs derived after the imputation process.

\* Uncertainty estimated using bootstrapping and corrected for clustering by hospital and type of surgery

SEM, standard error; CI, confidence interval; NA, not applicable.

### *Effectiveness*

The mean duration until RTW in the intervention group was 49.6 days versus 56.2 days in the usual care group. The adjusted difference in duration until RTW between intervention and

usual care was -4.1 days, but this difference was not statistically significant (95% CI -10.8 to 2.6) (table 3). For the other outcomes, no statistically differences were found between both groups at 12 months either.

**Table 3** Effects across treatment groups at 12 months follow-up

| Outcomes                  | Intervention<br>Mean (SEM)<br>n=227 | Usual care<br>Mean (SEM)<br>n=206 | Mean effect difference<br>(95% CI) * |
|---------------------------|-------------------------------------|-----------------------------------|--------------------------------------|
| Duration until RTW (days) | 49.6 (2.7)                          | 56.2 (2.2)                        | -4.1 (-10.8 to 2.6)                  |
| QALY's gained             | 0.96 (0.008)                        | 0.96 (0.007)                      | -0.001 (-0.023 to 0.020)             |
| HR-QoL (SF-36)            |                                     |                                   |                                      |
| PCS                       | 5.7 <sup>§</sup> (0.7)              | 6.7 <sup>§</sup> (0.6)            | -0.7 (-2.6 to 1.1)                   |
| MCS                       | 3.3 <sup>§</sup> (0.7)              | 3.7 <sup>§</sup> (0.8)            | -0.4 (-2.5 to 1.7)                   |
| Recovery (RI-10)          | 24.3 <sup>§</sup> (0.4)             | 25.0 <sup>§</sup> (0.5)           | -0.6 (-2.0 to 0.9)                   |

\* Uncertainty estimated using bootstrapping and corrected for clustering by hospital and type of surgery.

<sup>§</sup> Difference between baseline score and score at 12 months follow-up.

SEM, standard error; CI, confidence interval; RTW, return to work; QALY, Quality Adjusted Life Year; HR-QoL, health-related quality of life; SF, Short Form; PCS, physical component scale; MSC, mental component scale; RI, recovery index.

### Cost-effectiveness

The results of the cost-effectiveness analysis for duration until RTW are presented in table 4. The incremental cost-effectiveness ratio (ICER) for sustainable RTW was 56 indicating that each day earlier RTW in the intervention group is associated with cost savings of 56 euros in comparison with the usual care group. In the cost-effectiveness plane, 69% of the incremental cost effect pairs were located in the south east quadrant indicating that the intervention is more effective and less costly than usual care (figure 2a). The cost-effectiveness acceptability curve presented in figure 2b shows that if the societal willingness-to-pay (WTP) for one earlier day of RTW is €0, the probability that the intervention is cost-effective in comparison with usual care is 0.79. This probability increases to 0.97 at max if the WTP is €76 per day earlier RTW.

As the differences observed for the outcomes health-related quality of life and recovery after 12 months were small and not significant, the ICERs for these outcomes were quite large. In the cost-effectiveness plane, the majority of cost-effect pairs were located in the southern quadrants, indicating the intervention was less expensive. However, the cost-effect pairs were roughly divided between the eastern and western quadrant indicating that the intervention can lead to both better and worse outcomes compared to usual care (figure 2c).

**Table 4** Differences in pooled means costs and effects, incremental cost-effectiveness ratios and the distribution of incremental cost-effectiveness pairs around the quadrants of the cost-effectiveness planes (main analysis)

| Outcome          | $\Delta$ Cost* (€)  | $\Delta$ Effect* (days)         | ICER   | Distribution CE-plane |                 |                 |                 |
|------------------|---------------------|---------------------------------|--------|-----------------------|-----------------|-----------------|-----------------|
|                  | mean (95% CI)       | mean (95% CI)                   |        | €/day                 | NE <sup>1</sup> | SE <sup>2</sup> | SW <sup>3</sup> |
| RTW              | -228 (-708 to 136)  | 4.1 <sup>§</sup> (-2.6 to 10.8) | -56    | 15%                   | 69%             | 10%             | 6%              |
| QALY's gained    | -647 (-2116 to 735) | -0.001 (-0.023 to 0.020)        | 501187 | 4%                    | 42%             | 35%             | 19%             |
| HR-QoL (SF36)    |                     |                                 |        |                       |                 |                 |                 |
| PCS              | -647 (-2116 to 735) | -0.7 (-2.6 to 1.1)              | 870    | 6%                    | 19%             | 58%             | 17%             |
| MCS              | -647 (-2116 to 735) | -0.4 (-2.5 to 1.7)              | 1573   | 10%                   | 33%             | 44%             | 13%             |
| Recovery (RI-10) | -647 (-2116 to 735) | -0.6 (-2.0 to 0.9)              | 1127   | 5%                    | 22%             | 55%             | 18%             |

\* uncertainty estimated using bootstrapping and corrected for clustering by hospital and type of surgery

<sup>§</sup> Note that a positive value indicates faster RTW in the intervention group compared to the control group.

<sup>1</sup> Refers to the northeast quadrant of the CE-plane, indicating that the intervention care programme is more effective and more costly than usual care.

<sup>2</sup> Refers to the southeast quadrant of the CE-plane, indicating that the intervention care programme is more effective and less costly than usual care.

<sup>3</sup> Refers to the southwest quadrant of the CE-plane, indicating that the intervention care programme is less effective and less costly than usual care.

<sup>4</sup> Refers to the northeast quadrant of the CE-plane, indicating that the intervention care programme is less effective and more costly than usual care.

ICER, Incremental Cost-Effectiveness Ratio; CE plane, cost-effectiveness plane; RTW, return to work;

QALY, Quality Adjusted Life Year; HR-QoL, health-related quality of life; SF, Short Form; PSC, physical component scale; MSC, mental component scale; RI, recovery index.

**Table 5** Results from the per-protocol and sensitivity analyses (Return to Work)

| Analysis               | Sample size |     | $\Delta$ Cost* (€)<br>mean (95% CI) | $\Delta$ Effect* (days)<br>mean (95% CI) | ICER<br>€/day | Distribution CE-plane |                 |                 |                 |
|------------------------|-------------|-----|-------------------------------------|------------------------------------------|---------------|-----------------------|-----------------|-----------------|-----------------|
|                        | IC          | UC  |                                     |                                          |               | NE <sup>1</sup>       | SE <sup>2</sup> | SW <sup>3</sup> | NW <sup>4</sup> |
| Per-protocol analysis  | 205         | 188 | -359 (-866 to -11)                  | 6.4 <sup>§</sup> (-0.2 to 12.9)          | -56           | 8%                    | 87%             | 5%              | 1%              |
| Complete-case analysis | 154         | 150 | -45 (-466 to 362)                   | 11.6 <sup>§</sup> (-5.4 to 19.3)         | -4            | 45%                   | 55%             | 0%              | 0%              |
| Friction cost approach | 227         | 206 | -228 (-708 to 136)                  | 4.1 <sup>§</sup> (-2.6 to 10.8)          | -56           | 15%                   | 69%             | 10%             | 6%              |
| Healthcare perspective | 227         | 206 | -61 (-361 to 218)                   | 4.1 <sup>§</sup> (-2.6 to 10.8)          | -15           | 28%                   | 56%             | 5%              | 10%             |

\* uncertainty estimated using bootstrapping and corrected for clustering by hospital and type of surgery

<sup>§</sup> Note that a positive value indicates faster RTW in the intervention group compared to the control group.

<sup>1</sup> Refers to the northeast quadrant of the CE-plane, indicating that the intervention care programme is more effective and more costly than usual care.

<sup>2</sup> Refers to the southeast quadrant of the CE-plane, indicating that the intervention care programme is more effective and less costly than usual care.

<sup>3</sup> Refers to the southwest quadrant of the CE-plane, indicating that the intervention care programme is less effective and less costly than usual care.

<sup>4</sup> Refers to the northwest quadrant of the CE-plane, indicating that the intervention care programme is less effective and more costly than usual care.

IC, intervention care; UC, usual care; ICER, Incremental Cost-Effectiveness Ratio; CE plane, cost-effectiveness plane.

### *Cost-utility*

The difference in QALYs gained over 12 months between the two study groups was small and not statistically significant or clinically relevant (table 4). Therefore, the ICER for QALYs became extraordinary large (half million Euros). As a result, the probability that the intervention was cost-effective in comparison with usual care was considerably lower than for the primary outcome (0.77 at WTP is €0 per QALY gained and decreasing at higher WTP values) (figure 2d).

### *Per-protocol analysis*

In the per-protocol analysis 40 patients were excluded because they did not receive the care according to protocol due to several reasons: did not fit the inclusion criteria (n=3); had a more severe surgery than planned (n=25), or had a complicated postoperative course and needed a repeat surgery during follow-up (n=12). By excluding those patients, the difference in effect became larger, but was still not significant (-6.4 days, 95% CI -12.9 to 0.20) and the cost differences became statistically significant in favour of the intervention (mean difference €-359, 95% CI -866 to -11) (table 5). Hence, compared to the main analysis, the probability of cost-effectiveness increased considerably at a WTP of €0 per one day earlier RTW (from 0.79 to 0.92).

### *Sensitivity analyses*

The results of the primary outcome in the sensitivity analyses differed in some aspects from the main analysis (table 5). First, in the complete-case analysis, the effect difference between study groups became larger in favour of the intervention group, but the cost savings in the intervention group as compared to usual care became smaller. The probability of cost-effectiveness compared to the main analysis therefore decreased (from 0.79 to 0.55). Second, in the analyses performed from the healthcare perspective, cost savings became much smaller, as costs associated with lost productivity were not taken into account. As a result the probability of cost-effectiveness reduced (from 0.79 to 0.61). Finally, the results from the friction cost analysis were identical to the intention to treat analysis, indicating that the majority of patients returned to their work before the end of the friction period of 23 weeks.

The results of the per-protocol analyses and sensitivity analyses for the secondary outcomes QALYs, health-related quality of life and recovery are presented in online supplementary table S2. In the per-protocol analyses, cost differences became larger in favour of the

1  
2  
3 intervention group, however, they did not reach statistical significance. The probability of  
4 cost-effectiveness at a WTP of €0 per unit of effect increased from 0.77 to 0.93. In contrast to  
5 the complete-case analysis for the primary outcome, the complete-case analyses for the  
6 secondary outcomes showed a statistical significant increase in cost savings in the  
7 intervention group. The probability of cost-effectiveness at a WTP of €0 per unit of effect  
8 increased from 0.77 to 0.98  
9  
10  
11  
12

### 13 14 15 **Discussion**

16 In this study, we evaluated the cost-effectiveness and cost-utility of a rigorously designed  
17 Internet-based perioperative care programme compared with usual care for gynaecological  
18 patients. Our results show that for the primary outcome duration until full resumption of  
19 work, the probability that the care programme is cost-effective as compared to usual care is  
20 0.97 at a willingness to pay of €76 per day earlier RTW. Taking into account that the average  
21 costs per sick leave day are €230, we conclude that the intervention is cost-effective as  
22 compared to usual care.  
23  
24  
25  
26  
27  
28

### 29 30 *Interpretation of the findings*

31 In the current economic evaluation, the adjusted mean difference until RTW between study  
32 groups was not statistically significant (-4.1 days, 95% CI -10.8 to 2.6). In the accompanying  
33 paper on the clinical effectiveness of the intervention, median days until RTW were compared  
34 between study arms using Cox regression analyses. However, survival analysis results in  
35 difficulties in interpreting the ICER. Therefore, we chose to compare mean days until RTW in  
36 the current cost-effectiveness study and used bootstrapping to account for the skewed  
37 distribution of this variable.  
38  
39  
40  
41  
42  
43

44 In addition, the cost-difference between the intervention group and the control group was not  
45 statistically significant either, although total societal costs were lower in the intervention  
46 group than in the control group. A possible explanation might be that the sample size of this  
47 study was based on the primary outcome full sustainable return to work, and, therefore,  
48 underpowered to detect relevant cost differences, as cost data are right skewed and require  
49 relative large samples.<sup>26</sup>  
50  
51  
52  
53  
54

55  
56 Secondary care costs in the intervention group were lower compared to the usual care group.  
57 Future research should investigate if the care programme truly leads to different health  
58  
59  
60



1  
2  
3 seeking behaviour. Possibly, patients receiving additional perioperative care were more  
4 confident in their own self-management skills preventing them from visiting a healthcare  
5 professional. In addition, costs associated with primary care were similar in both groups,  
6 demonstrating that the care programme did not cause a shift from secondary care to primary  
7 care in the intervention group compared to the usual care group. Concerns of increased  
8 workload in the primary care setting due to changes in perioperative care have been reported  
9 before, however, seem to be ungrounded.<sup>27, 28</sup>  
10  
11  
12  
13  
14  
15

16 We did not find any clinical relevant differences in the secondary outcomes. Thus, despite the  
17 possible difference in the RTW rates between study groups, this did not have an effect on  
18 patients' perceptions about their quality of life and recovery. Possibly, the surgery itself has a  
19 much larger impact on these outcomes than the method of postoperative guidance.  
20  
21  
22  
23

24 The results of the per-protocol analyses, were slightly more favourable than those of the main  
25 analyses. Thus, by presenting the intervention to the ideal target population, the probability of  
26 cost-effectiveness of the intervention in comparison with usual care increases. This is in  
27 concordance with our initial objective to develop Internet-based care programme for women  
28 undergoing an uncomplicated surgical procedure.<sup>10</sup> It may be challenging to identify future  
29 patients who will benefit most from the care programme, as complications cannot always be  
30 predicted pre-operatively. In addition, it should be investigated further what the needs are of  
31 patients with a complicated course and how they should best be guided and monitored during  
32 their recovery.  
33  
34  
35  
36  
37  
38  
39  
40

#### 41 ***Strengths and weaknesses of the study***

42 Several strengths of the present study are noteworthy. First of all, we are not aware of other  
43 current perioperative interventions that aim at preventing unnecessary prolonged recovery and  
44 reducing sick leave in order to contain societal costs associated with gynaecological surgical  
45 care. Second, analyses were performed alongside a pragmatic trial, allowing prospective  
46 collection of relevant cost and effect data and enabling the evaluation of the intervention's  
47 cost-effectiveness under real world conditions.<sup>26</sup> The third strength concerns the use of linear  
48 multilevel analyses to account for possible clustering of data as a result of the chosen study  
49 design. Randomization at cluster level was chosen to prevent contamination between the  
50 study arms. Moreover, the employment of a stepped wedge design allowed the sequential  
51  
52  
53  
54  
55  
56  
57  
58  
59  
60



1  
2  
3 implementation of the care programme in the participating hospitals, providing the possibility  
4 to study the implementation process as well.  
5  
6

7  
8 Our study also has limitations. The first limitation is the collection of cost data through self-  
9 reported retrospective questionnaires. However, since administrative data on service use are  
10 very hard to obtain in the Netherlands, societal cost data can only be collected by means of  
11 self-report. In order to prevent recall-bias, we minimised the recall period to only one month.  
12 In addition, if there was recall bias, it seems unlikely that this systematically differed between  
13 the study groups. Therefore, we expect that this does not affect our estimations. A second  
14 limitation concerns the amount of incomplete data. Despite our efforts to obtain full data from  
15 the patients in the trial, only 70.4% of the study population had complete cost data. Although  
16 this is an acceptable rate of missing data, complete-case analyses may be biased and have less  
17 precision.<sup>29, 30</sup> We tried to account for this by applying multiple imputation for missing data.<sup>31</sup>  
18 Comparison of participants with complete and incomplete data resulted in a number of  
19 variables that predicted the presence of missing data. Therefore, we concluded that the data  
20 was missing at random, making multiple imputation the appropriate method to deal with the  
21 missing data. Finally, it should be noted that a typical feature of Internet-based interventions  
22 is the risk of selection bias towards the higher educated participant. Also in our study,  
23 included participant were employed women of which the majority was highly educated, and  
24 patients that were computer or Internet illiterate were excluded. Therefore, caution is needed  
25 when generalising the findings, as clinical and cost-effectiveness may be reduced when the  
26 intervention is accessible for the general audience. Moreover, due to (cultural) differences in  
27 attitudes towards health and work as well as differences in the organization of social and  
28 health care systems, generalisability of the results across countries might be hampered as well.  
29  
30  
31  
32  
33  
34  
35  
36  
37  
38  
39  
40  
41  
42  
43  
44

#### 45 ***Comparison with other studies***

46 We showed that costs associated with productivity loss following gynaecological surgery  
47 were about two times higher than healthcare costs. We are not aware of previously published  
48 literature in the gynaecological field in which this was demonstrated before. As a matter of  
49 fact, outcomes such as long-term convalescence, return to normal activities and absenteeism  
50 following gynaecological surgery are under-reported in clinical trials. In a review of Roumm  
51 et. al. assessing the clinical and economic benefits of minimal invasive surgery compared to  
52 open alternatives, only five of the 19 eligible studies reported data on return to work or return  
53 to normal activities, while 15 studies reported on hospital costs and all studies reported on  
54  
55  
56  
57  
58  
59  
60

1  
2  
3 length of stay.<sup>32</sup> Similarly, in a recent Cochrane systematic review assessing the effectiveness  
4 and safety of different surgical approaches to hysterectomy in women with benign  
5 gynaecological disease, 45 of the 47 included studies reported on the length of postoperative  
6 hospital stay and only 19 studies reported data on return to normal activities.<sup>33</sup>  
7  
8  
9

10  
11 Cost-effectiveness is one of the most frequently cited reason for developing Internet  
12 interventions, because of the relative low delivery costs and the potential high impact.<sup>34</sup>  
13 However, economic evaluations are mainly lacking. A recent systematic review that evaluated  
14 the effect of perioperative e-Health interventions on the postoperative course, concluded that  
15 only 6 of 19 included studies reported on costs and in only one study a full economic  
16 evaluation was performed.<sup>35</sup> Thus, the current study addresses this literature gap as well.  
17  
18  
19  
20  
21

### 22 ***Policy implications and recommendations***

23  
24 Whether the perioperative Internet-based care programme under study is considered cost-  
25 effective in comparison with usual care in accelerating return to work following  
26 gynaecological surgery depends on society's willingness to pay for a reduced sick leave day,  
27 as well as the probability of cost-effectiveness that is considered acceptable. Our results show  
28 that the probability of cost-effectiveness is 0.97 at a WTP of €76 per day earlier RTW.  
29 Considering that on average the costs of a day of sickness absence are €230,<sup>17</sup> we expect that  
30 this intervention can be considered cost-effective in comparison with usual care.  
31  
32  
33  
34  
35  
36  
37

38 A latent barrier to future acceptance and implementation of the care programme lies in the  
39 fact that the costs and benefits of the care programme are separated between different types of  
40 stakeholders. In the Netherlands, medical costs are paid by the government and health  
41 insurance companies and sickness benefits are the main responsibility of the employers,  
42 which makes the shifting of costs across these sectors hard. As follows, investments are made  
43 in the healthcare sector for implementing the care programme and changing care processes,  
44 while the largest benefits accrue to employers through reduced lost productivity costs.  
45 However, many countries have an employer-provided health insurance (e.g. the United  
46 States), and in those countries this Internet-based care programme is much more likely to be  
47 adapted as investments in the Internet-based care programme may directly lead to savings  
48 through improved productivity rates.  
49  
50  
51  
52  
53  
54  
55  
56  
57

### 58 **Conclusions**

1  
2  
3 The encouraging outcomes of this trial show that there is an economic case for supporting  
4 patients in the perioperative period with an Internet-based care programme. The care  
5 programme has a potential to lead to societal cost savings as a result of a reduction in the  
6 duration until full sustainable RTW. If society is willing to pay €76 per day earlier RTW, the  
7 care programme is considered cost-effective in comparison with usual care in women  
8 undergoing benign gynaecological surgery. Policy makers should investigate how these  
9 monetary benefits can be distributed across stakeholders.  
10  
11  
12  
13

### 14 15 16 **Acknowledgements**

17 We thank the participants of this trial. Mr. D. Stomp is thanked for his extensive role in  
18 developing the web portal. Mr. D. Knol is thanked for his statistical contributions in the  
19 earlier phases of this research. Ms. A. Scholten is thanked for her role in the recruitment of  
20 patients.  
21  
22  
23  
24  
25

### 26 **Contributorship statement**

27 All named authors made substantial contributions to this study and the article. EVB, HAB,  
28 JRA, and JAH participated in the design and/or execution of the study, the interpretation of  
29 data, and the drafting and/or revision of the article. JEB and JMD were involved in the  
30 statistical data analyses and interpretation of the data, and the revision of the article. All  
31 named authors approved the final version of the manuscript. EVB and JAH are the study  
32 guarantors.  
33  
34  
35  
36  
37  
38  
39

### 40 **Funding statement**

41 This study is funded by the Netherlands Organisation for Scientific Research and  
42 Development (ZonMw grants 171102015 and 92003590). ZonMw did not have any  
43 involvement in the study design, data collection, analysis or interpretation, nor in writing the  
44 report and decision to submit for publication. The views expressed in this report are those of  
45 the authors and not necessarily of those of ZonMw.  
46  
47  
48  
49  
50

### 51 **Competing interests statement**

52 All authors have completed the ICMJE uniform disclosure form at:  
53 [www.icmje.org/coi\\_disclosure.pdf](http://www.icmje.org/coi_disclosure.pdf). Dr. Anema reports a chair in Insurance Medicine paid by  
54 the Dutch Social Security Agency, and he is stockholder of Evalua LTD. Dr. Huirne reports  
55 grants from Samsung, grants from Gideon Richter, grants from Celonova, outside the  
56  
57  
58  
59  
60

1  
2  
3 submitted work. Dr. Brölmann reports grants from Olympus, personal fees from Nordic  
4 Farma, during the conduct of the study . Dr. Anema and dr. Huirne are planning to set up a  
5 spin-off company concerning the implementation of a mobile application concerning the  
6 IKHERSTEL intervention in the Netherlands. The remaining authors have nothing to  
7 disclose.  
8  
9  
10

### 11 12 13 **Ethics approval**

14 The study protocol was approved by the Institutional Review Board of the VU University  
15 Medical Centre (16 May 2011, no. 2011/142) and by the medical ethics committees of all  
16 other participating Onze Lieve Vrouwe Gasthuis Oost (Amsterdam), Meander Medical Center  
17 (Amersfoort), Amstelland Hospital (Amsterdam), Medical Center Alkmaar (Alkmaar),  
18 Diaconessenhuis (Utrecht), Spaarne Gasthuis (locations Haarlem and Hoofddorp), and Flevo  
19 Hospital (Almere). Informed consent was obtained from all participants.  
20  
21  
22  
23  
24  
25

### 26 **Data sharing**

27 No additional data are available, though details on statistical analyses are available from the  
28 corresponding author on request.  
29  
30  
31  
32

### 33 **Figure legends**

#### 34 **Figure 1** Trial profile

35 No legend needed  
36  
37  
38

#### 39 **Figure 2** Cost-effectiveness planes and cost-effectiveness acceptability curves for RTW and 40 QALYs

41 Legend: The cost-effectiveness planes indicate the uncertainty around the incremental cost-  
42 effectiveness ratio for RTW (a) and QALYs (c). The cost-effectiveness acceptability curves  
43 indicate the probability of cost-effectiveness for different values (€) of willingness to pay per  
44 unit of effect gained for RTW (b) and QALYs (d).  
45  
46  
47  
48

49 RTW, return to work; QALY, Quality Adjusted Life Year.  
50  
51  
52

### 53 **Supplementary files**

54 **Supplementary table S1** Costs of the intervention care programme from the societal  
55 perspective, valued using a bottom-up micro-costing approach.  
56  
57  
58  
59  
60

1  
2  
3 **Supplementary table S2** Differences in pooled means costs and effects, incremental cost-  
4 effectiveness ratios and the distribution of incremental cost-effectiveness pairs around the  
5 quadrants of the cost-effectiveness plane.  
6  
7  
8

### 9 10 **References**

- 11 1. Cox H. Recovery from gynaecological day surgery: are we underestimating the process.  
12 *Journal of Ambulatory Surgery*. 2003;10:114-21.
- 13 2. Horvath KJ. Postoperative recovery at home after ambulatory gynecologic laparoscopic  
14 surgery. *J Perianesth Nurs*. 2003;18(5):324-34.
- 15 3. Gilmartin J. Contemporary day surgery: patients' experience of discharge and recovery.  
16 *J Clin Nurs*. 2007;16(6):1109-17.
- 17 4. Evenson M, Payne D, Nygaard I. Recovery at home after major gynecologic surgery:  
18 how do our patients fare? *Obstet Gynecol*. 2012;119(4):780-4.
- 19 5. Kehlet H, Wilmore DW. Multimodal strategies to improve surgical outcome. *Am J*  
20 *Surg*. 2002;183(6):630-41.
- 21 6. Kjolhede P, Borendal Wodlin N, Nilsson L, Fredrikson M, Wijma K. Impact of stress  
22 coping capacity on recovery from abdominal hysterectomy in a fast-track programme: a  
23 prospective longitudinal study. *BJOG*. 2012;119(8):998-1006.
- 24 7. Wodlin NB, Nilsson L. The development of fast-track principles in gynecological  
25 surgery. *Acta Obstet Gynecol Scand*. 2013;92(1):17-27.
- 26 8. Naidu M, Sultan AH, Thakar R. Convalescence advice following gynaecological  
27 surgery. *J Obstet Gynaecol*. 2012;32(6):556-9.
- 28 9. Bouwsma EVA, Anema JR, Vonk Noordegraaf A, Knol DL, Bosmans JE, Schraffordt  
29 Koops SE, et al. The cost effectiveness of a tailored, web-based care program to  
30 enhance postoperative recovery in gynecologic patients in comparison with usual care:  
31 protocol of a stepped wedge cluster randomized controlled trial. *JMIR Res Protoc*.  
32 2014;3(2):e30.
- 33 10. Vonk Noordegraaf A, Huirne JAF, Brolmann HAM, Van Mechelen W, Anema JR.  
34 Multidisciplinary convalescence recommendations after gynaecological surgery: a  
35 modified Delphi method among experts. *BJOG*. 2011;118(13):1557-67.
- 36 11. Vonk Noordegraaf A, Huirne JAF, Pittens CA, van Mechelen W, Broerse JEW,  
37 Brolmann HAM, et al. eHealth Program to Empower Patients in Returning to Normal  
38 Activities and Work After Gynecological Surgery: Intervention Mapping as a Useful  
39 Method for Development. *J Med Internet Res*. 2012;14(5):e124.
- 40  
41  
42  
43  
44  
45  
46  
47  
48  
49  
50  
51  
52  
53  
54  
55  
56  
57  
58  
59  
60

12. Dolan P. Modeling valuations for EuroQol health states. *Med Care*. 1997;35(11):1095-108.
13. Lamers LM, Stalmeier PF, McDonnell J, Krabbe PF, van Busschbach JJ. [Measuring the quality of life in economic evaluations: the Dutch EQ-5D tariff]. *Ned Tijdschr Geneeskd*. 2005;149(28):1574-8.
14. Aaronson NK, Muller M, Cohen PD, Essink-Bot ML, Fekkes M, Sanderman R, et al. Translation, validation, and norming of the Dutch language version of the SF-36 Health Survey in community and chronic disease populations. *J Clin Epidemiol*. 1998;51(11):1055-68.
15. Kluivers KB, Hendriks JCM, Mol BWJ, Bongers MY, Vierhout ME, Brolmann HAM, et al. Clinimetric properties of 3 instruments measuring postoperative recovery in a gynecologic surgical population. *Surgery*. 2008;144(1):12-21.
16. Frick KD. Microcosting quantity data collection methods. *Med Care*. 2009;47(7 Suppl 1):S76-S81.
17. Hakkaart-van Roijen L, Tan S, Bouwmans C. Handleiding Voor Kostenonderzoek. Methoden en Standaardkostprijzen Voor Economische Evaluaties in de Gezondheidszorg. 2010.
18. Z-index. G-Standaard. Z-index [Internet]. 2014. Available from: <http://www.webcitation.org/6NnSqBHJW>.
19. Koopmanschap MA. PRODISQ: a modular questionnaire on productivity and disease for economic evaluation studies. *Expert Rev Pharmacoecon Outcomes Res*. 2005;5(1):23-8.
20. van Dongen JM, van Wier MF, Tompa E, Bongers PM, van der Beek AJ, van Tulder MW, et al. Trial-based economic evaluations in occupational health: principles, methods, and recommendations. *J Occup Environ Med*. 2014;56(6):563-72.
21. Drummond MF, Sculpher MJ, Torrance GW, O'Brien BJ, Stoddart GL. *Methods for the Economic Evaluation of Health Care Programmes*. 3 ed. New York: Oxford University Press; 2005.
22. White IR, Royston P, Wood AM. Multiple imputation using chained equations: Issues and guidance for practice. *Stat Med*. 2011;30(4):377-99.
23. Rubin DB. *Multiple Imputation for Nonresponse in Surveys*. New York, NY: John Wiley & Sons; 1987.
24. Efron B. Missing Data, Imputation, and the Bootstrap. *Journal of the American Statistical Association*. 2012;89(426):463-75.

- 1
  - 2
  - 3
  - 4
  - 5
  - 6
  - 7
  - 8
  - 9
  - 10
  - 11
  - 12
  - 13
  - 14
  - 15
  - 16
  - 17
  - 18
  - 19
  - 20
  - 21
  - 22
  - 23
  - 24
  - 25
  - 26
  - 27
  - 28
  - 29
  - 30
  - 31
  - 32
  - 33
  - 34
  - 35
  - 36
  - 37
  - 38
  - 39
  - 40
  - 41
  - 42
  - 43
  - 44
  - 45
  - 46
  - 47
  - 48
  - 49
  - 50
  - 51
  - 52
  - 53
  - 54
  - 55
  - 56
  - 57
  - 58
  - 59
  - 60
25. van der Leeden R. Resampling multilevel models. *Handbook of Multilevel Analysis*: Springer Science, editors; 2008.
26. Petrou S, Gray A. Economic evaluation alongside randomised controlled trials: design, conduct, analysis, and reporting. *BMJ*. 2011;342:d1548.
27. Bailey J, Roland M, Roberts C. Is follow up by specialists routinely needed after elective surgery? A controlled trial. *J Epidemiol Community Health*. 1999;53(2):118-24.
28. Easton K, Read MD, Woodman NM. Influence of early discharge after hysterectomy on patient outcome and GP workloads. *J Obstet Gynaecol*. 2003;23(3):271-5.
29. Burton A, Billingham LJ, Bryan S. Cost-effectiveness in clinical trials: using multiple imputation to deal with incomplete cost data. *Clin Trials*. 2007;4(2):154-61.
30. MacNeil VJ, Eekhout I, Dijkgraaf MG, van HH, de Rooij SE, Heymans MW, et al. Multiple imputation strategies for zero-inflated cost data in economic evaluations: which method works best? *Eur J Health Econ*. 2016;17(8):939-50.
31. Briggs A, Clark T, Wolstenholme J, Clarke P. Missing... presumed at random: cost-analysis of incomplete data. *Health Econ*. 2003;12(5):377-92.
32. Roumm AR, Pizzi L, Goldfarb NI, Cohn H. Minimally invasive: minimally reimbursed? An examination of six laparoscopic surgical procedures. *Surg Innov*. 2005;12(3):261-87.
33. Aarts JW, Nieboer TE, Johnson N, Tavender E, Garry R, Mol BW, et al. Surgical approach to hysterectomy for benign gynaecological disease. *Cochrane Database Syst Rev*. 2015(8):CD003677.
34. Tate DF, Finkelstein EA, Khavjou O, Gustafson A. Cost effectiveness of internet interventions: review and recommendations. *Ann Behav Med*. 2009;38(1):40-5.
35. van der Meij E, Anema JR, Otten RH, Huirne JA, Schaafsma FG. The Effect of Perioperative E-Health Interventions on the Postoperative Course: A Systematic Review of Randomised and Non-Randomised Controlled Trials. *PLoS One*. 2016;11(7):e0158612.



**Figure 1** Trial profile

201x218mm (300 x 300 DPI)



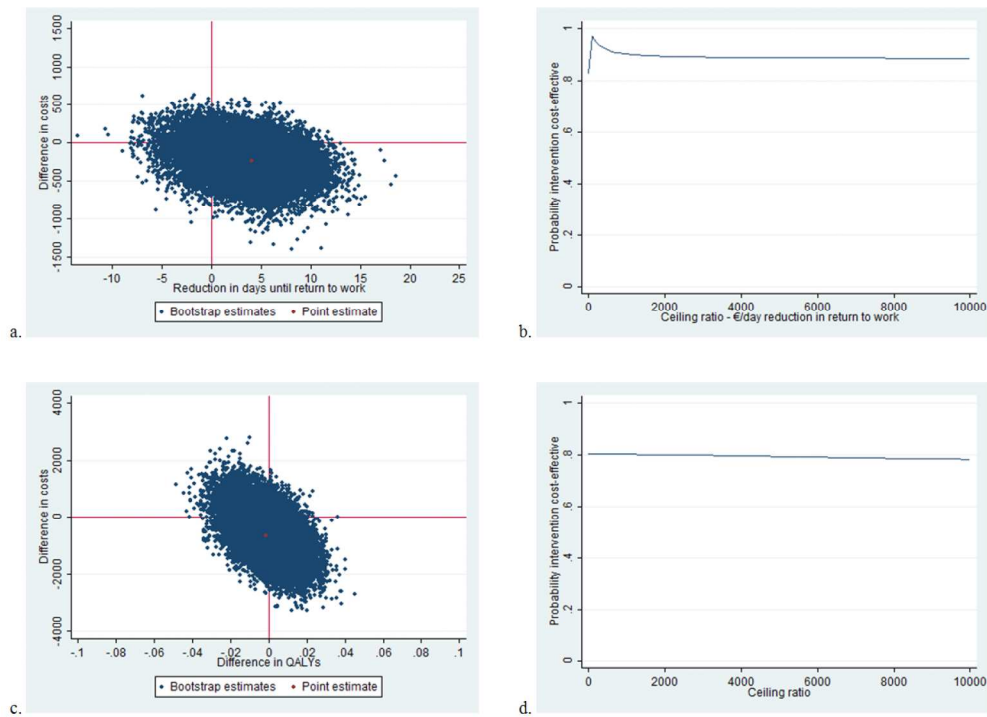

**Figure 2** The cost-effectiveness planes indicate the uncertainty around the incremental cost-effectiveness ratio for RTW (a) and QALYs (c). The cost-effectiveness acceptability curves indicate the probability of cost-effectiveness for different values (€) of willingness to pay per unit of effect gained for RTW (b) and QALYs (d).

RTW, return to work; QALY, Quality Adjusted Life Year.

441x321mm (300 x 300 DPI)

**Supplementary table S1** Costs of the intervention care programme from the societal perspective, valued using a bottom-up micro-costing approach

| Intervention component             | Cost category     | Staff                   | Units      | Unit Price | Total costs (n=227) | Costs per patient |
|------------------------------------|-------------------|-------------------------|------------|------------|---------------------|-------------------|
| <b>Implementation costs</b>        |                   |                         |            |            |                     |                   |
| Training sessions (care-managers)  | labour costs      | principal investigator  | 5 hours    | € 36.94    | € 184.69            | € 0.81            |
|                                    | labour costs      | occupational physicians | 18 hours   | € 89.68    | € 1,614.24          | € 7.11            |
|                                    | labour costs      | occupational therapist  | 2 hours    | € 46.32    | € 92.64             | € 0.41            |
|                                    | capital costs     |                         | 5 hours    | € 6.26     | € 31.29             | € 0.14            |
| Training sessions (hospital staff) | labour costs      | principal investigator  | 38 hours   | € 36.94    | € 1,403.67          | € 6.18            |
|                                    | travel costs      | principal investigator  | 582 km     | € 0.22     | € 127.28            | € 0.56            |
|                                    | labour costs      | gynaecologists          | 18.9 hours | € 107.30   | € 2,027.90          | € 8.93            |
|                                    | labour costs      | residents               | 18.9 hours | € 42.58    | € 804.82            | € 3.55            |
|                                    | labour costs      | nurses                  | 45 hours   | € 42.64    | € 1,918.58          | € 8.45            |
|                                    | capital costs     |                         | 9 hours    | € 6.26     | € 56.33             | € 0.25            |
|                                    | printed materials |                         |            |            | € 821.00            | € 3.62            |
|                                    |                   |                         |            |            | <b>Subtotal</b>     | <b>€ 40.01</b>    |
| <b>eHealth intervention</b>        |                   |                         |            |            |                     |                   |
| Electronic approval                | labour costs      | gynaecologists          | 14.2 hours | € 107.30   | € 1,523.60          | € 6.71            |
|                                    | capital costs     |                         | 14.2 hours | € 4.17     | € 59.15             | € 0.26            |
| Maintenance                        | labour costs      | computer specialist     | 12.2 hours | € 37.82    | € 461.45            | € 2.03            |
|                                    | capital costs     |                         | 12.2 hours | € 1.67     | € 20.33             | € 0.09            |
| Administrator time                 | labour costs      | research assistant      | 37.8 hours | € 33.42    | € 1,263.23          | € 5.56            |
|                                    | capital costs     |                         | 37.8 hours | € 4.17     | € 157.46            | € 0.69            |
| Website hosting                    | other             |                         | 40 months  | € 18.84    | € 578.88            | € 2.55            |
|                                    |                   |                         |            |            | <b>Subtotal</b>     | <b>€ 17.90</b>    |
| <b>Occupational intervention</b>   |                   |                         |            |            |                     |                   |
| Pre-operative consultations        | labour costs      | occupational physicians | 7.9 hours  | € 89.68    | € 708.47            | € 3.12            |

|                                 |               |                         |              |         |                 |                     |
|---------------------------------|---------------|-------------------------|--------------|---------|-----------------|---------------------|
|                                 | capital costs |                         | 7.9 hours    | € 4.17  | € 32.91         | € 0.14              |
|                                 | phone costs   |                         | 413 minutes  | € 0.09  | € 38.71         | € 0.17              |
| Post-operative consultations    | labour costs  | occupational physicians | 37.5 hours   | € 89.68 | € 3.363.00      | € 14.81             |
|                                 | capital costs |                         | 37.5 hours   | € 4.17  | € 156.21        | € 0.69              |
|                                 | phone costs   |                         | 2083 minutes | € 0.09  | € 195.23        | € 0.86              |
| Workplace intervention          | labour costs  | occupational therapist  | 4 hours      | € 46.32 | € 185.29        | € 0.82              |
|                                 | capital costs |                         | 3 hours      | € 6.26  | € 18.78         | € 0.08              |
|                                 | labour costs  | employer                | 2 hours      | € 83.69 | € 167.37        | € 0.74              |
|                                 | travel costs  | occupational therapist  | 110 km       | € 0.22  | € 24.06         | € 0.11              |
|                                 |               |                         |              |         | <b>Subtotal</b> | <b>€ 21.54</b>      |
| <b>Developmental costs</b>      |               |                         |              |         | € 33,873.55     | € 0.56 <sup>§</sup> |
|                                 |               |                         |              |         | <b>Subtotal</b> | <b>€ 0.56</b>       |
| <b>TOTAL intervention costs</b> |               |                         |              |         | <b>€ 80.02</b>  |                     |

Costs are expressed in 2014 Euros (€1.00 = £0.85; \$1.06).

<sup>§</sup> € 33,873.55 was paid for the development of the intervention care-programme. For calculating the development costs per participant, these were divided by the expected number of users during the first five years after implementation (60,200). Per year 20,000 gynaecologic surgeries (LAS, TLH, VH, AH) are being performed in the Netherlands and based on the outcomes of an earlier performed process-evaluation we hypothesized a reach of 60.2%.<sup>42</sup>

**Supplementary table S2** Differences in pooled means costs and effects, incremental cost-effectiveness ratios and the distribution of incremental cost-effectiveness pairs around the quadrants of the cost-effectiveness plane

| Analysis                              | Sample size |     | $\Delta$ Cost* (€)<br>mean (95% CI) | $\Delta$ Effect* (days)<br>mean (95% CI) | ICER<br>€/day | Distribution CE-plane |                 |                 |                 |  |
|---------------------------------------|-------------|-----|-------------------------------------|------------------------------------------|---------------|-----------------------|-----------------|-----------------|-----------------|--|
|                                       | IC          | UC  |                                     |                                          |               | NE <sup>1</sup>       | SE <sup>2</sup> | SW <sup>3</sup> | NW <sup>4</sup> |  |
| <b>QALYs</b>                          |             |     |                                     |                                          |               |                       |                 |                 |                 |  |
| Intention to treat                    | 227         | 206 | -647 (-2116 to 735)                 | -0.001 (-0.023 to 0.020)                 | 501187        | 4%                    | 42%             | 35%             | 19%             |  |
| Per-protocol analysis                 | 205         | 188 | -1148 (-2611 to 162)                | 0.003 (-0.019 to 0.024)                  | -432881       | 1%                    | 59%             | 34%             | 6%              |  |
| Complete-case analysis                | 132         | 136 | -1607 (-3421 to 52)                 | 0.009 (-0.013 to 0.033)                  | -202816       | 1%                    | 72%             | 24%             | 3%              |  |
| Friction cost approach                | 227         | 206 | -825 (-2209 to 470)                 | -0.001 (-0.023 to 0.020)                 | 639131        | 2%                    | 44%             | 42%             | 12%             |  |
| Healthcare perspective                | 227         | 206 | -61 (-361 to 218)                   | -0.001 (-0.023 to 0.020)                 | 46942         | 13%                   | 33%             | 28%             | 26%             |  |
| <b>SF-36 PHYSICAL COMPONENT SCORE</b> |             |     |                                     |                                          |               |                       |                 |                 |                 |  |
| Intention to treat                    | 227         | 206 | -647 (-2116 to 735)                 | -0.7 (-2.6 to 1.1)                       | 870           | 6%                    | 19%             | 58%             | 17%             |  |
| Per-protocol analysis                 | 205         | 188 | -1148 (-2611 to 162)                | -0.9 (-2.8 to 1.1)                       | 1350          | 2%                    | 21%             | 71%             | 6%              |  |
| Complete-case analysis                | 153         | 149 | -1689 (-3316 to -231)               | -1.2 (-3.3 to 0.8)                       | 1389          | 0%                    | 12%             | 86%             | 2%              |  |
| Friction cost approach                | 227         | 206 | -825 (-2209 to 470)                 | -0.7 (-2.6 to 1.1)                       | 1109          | 4%                    | 21%             | 64%             | 11%             |  |
| Healthcare perspective                | 227         | 206 | -61 (-361 to 218)                   | -0.7 (-2.6 to 1.1)                       | 81            | 8%                    | 17%             | 44%             | 31%             |  |
| <b>SF-36 MENTAL COMPONENT SCALE</b>   |             |     |                                     |                                          |               |                       |                 |                 |                 |  |
| Intention to treat                    | 227         | 206 | -647 (-2116 to 735)                 | -0.4 (-2.5 to 1.7)                       | 1573          | 10%                   | 33%             | 44%             | 13%             |  |
| Per-protocol analysis                 | 205         | 188 | -1148 (-2611 to 162)                | -0.5 (-2.7 to 1.7)                       | 2198          | 2%                    | 32%             | 61%             | 5%              |  |
| Complete-case analysis                | 153         | 149 | -1689 (-3316 to -231)               | -0.1 (-2.6 to 1.9)                       | 12598         | 1%                    | 49%             | 49%             | 1%              |  |
| Friction cost approach                | 227         | 206 | -825 (-2209 to 470)                 | -0.4 (-2.5 to 1.7)                       | 2006          | 6%                    | 37%             | 49%             | 8%              |  |
| Healthcare perspective                | 227         | 206 | -61 (-361 to 218)                   | -0.4 (-2.5 to 1.7)                       | 147           | 17%                   | 26%             | 35%             | 22%             |  |
| <b>RECOVERY INDEX</b>                 |             |     |                                     |                                          |               |                       |                 |                 |                 |  |
| Intention to treat                    | 227         | 206 | -647 (-2116 to 735)                 | -0.6 (-2.0 to 0.9)                       | 1127          | 5%                    | 22%             | 55%             | 18%             |  |
| Per-protocol analysis                 | 205         | 188 | -1148 (-2611 to 162)                | -0.7 (-2.1 to 0.8)                       | 1786          | 1%                    | 23%             | 70%             | 6%              |  |
| Complete-case analysis                | 153         | 149 | -1689 (-3316 to -231)               | -0.7 (-2.2 to 0.7)                       | 2562          | 1%                    | 20%             | 78%             | 1%              |  |
| Friction cost approach                | 227         | 206 | -825 (-2209 to 470)                 | -0.6 (-2.0 to 0.9)                       | 1437          | 3%                    | 24%             | 62%             | 12%             |  |
| Healthcare perspective                | 227         | 206 | -61 (-361 to 218)                   | -0.6 (-2.0 to 0.9)                       | 106           | 8%                    | 19%             | 42%             | 31%             |  |

---

\* uncertainty estimated using bootstrapping and corrected for clustering by hospital and type of surgery

<sup>1</sup> Refers to the northeast quadrant of the CE-plane, indicating that the intervention care programme is more effective and more costly than usual care.

<sup>2</sup> Refers to the southeast quadrant of the CE-plane, indicating that the intervention care programme is more effective and less costly than usual care.

<sup>3</sup> Refers to the southwest quadrant of the CE-plane, indicating that the intervention care programme is less effective and less costly than usual care.

<sup>4</sup> Refers to the northwest quadrant of the CE-plane, indicating that the intervention care programme is less effective and more costly than usual care.

IC, intervention care; UC, usual care; ICER, Incremental Cost-effectiveness Ratio; CE plane, cost-effectiveness plane.

---

## CHEERS checklist

| Section/item                    | Item No | Recommendation                                                                                                                                                                             | Reported on page No/line No                                  |
|---------------------------------|---------|--------------------------------------------------------------------------------------------------------------------------------------------------------------------------------------------|--------------------------------------------------------------|
| <i>Title and abstract</i>       |         |                                                                                                                                                                                            |                                                              |
| Title                           | 1       | Identify the study as an economic evaluation or use more specific terms such as “cost-effectiveness analysis”, and describe the interventions compared.                                    | page 1, line 6.                                              |
| Abstract                        | 2       | Provide a structured summary of objectives, perspective, setting, methods (including study design and inputs), results (including base case and uncertainty analyses), and conclusions.    | page 2, line 3 to 28.                                        |
| <i>Introduction</i>             |         |                                                                                                                                                                                            |                                                              |
| Background and objectives       | 3       | Provide an explicit statement of the broader context for the study.<br>Present the study question and its relevance for health policy or practice decisions.                               | page 3, line 4 to 14;<br>page 3, line 14 to 22.              |
| <i>Methods</i>                  |         |                                                                                                                                                                                            |                                                              |
| Target population and subgroups | 4       | Describe characteristics of the base case population and subgroups analysed, including why they were chosen.                                                                               | page 5, line 4 to 9;<br>page 9, line 9 to 17.                |
| Setting and location            | 5       | State relevant aspects of the system(s) in which the decision(s) need(s) to be made.                                                                                                       | page 4, line 33 to page 5, line 2.                           |
| Study perspective               | 6       | Describe the perspective of the study and relate this to the costs being evaluated.                                                                                                        | page 4, line 26 to 28.                                       |
| Comparators                     | 7       | Describe the interventions or strategies being compared and state why they were chosen.                                                                                                    | page 5, line 21 to page 6, line 9;<br>page 6, line 11 to 18. |
| Time horizon                    | 8       | State the time horizon(s) over which costs and consequences are being evaluated and say why appropriate.                                                                                   | page 4, line 29 to 30;<br>page 8, line 12 to 13.             |
| Discount rate                   | 9       | Report the choice of discount rate(s) used for costs and outcomes and say why appropriate.                                                                                                 | page 8, line 12 to 13.                                       |
| Choice of health outcomes       | 10      | Describe what outcomes were used as the measure(s) of benefit in the evaluation and their relevance for the type of analysis performed.                                                    | page 6, line 21 to 33.                                       |
| Measurement of effectiveness    | 11a     | <i>Single study-based estimates:</i> Describe fully the design features of the single effectiveness study and why the single study was a sufficient source of clinical effectiveness data. | page 4, line 25 to 28;<br>page 5, line 22 to page 6, line 9. |

| Section/item                                           | Item No | Recommendation                                                                                                                                                                                                                                                                                                                                        | Reported on page No/line No                    |
|--------------------------------------------------------|---------|-------------------------------------------------------------------------------------------------------------------------------------------------------------------------------------------------------------------------------------------------------------------------------------------------------------------------------------------------------|------------------------------------------------|
| Measurement and valuation of preference based outcomes | 12      | If applicable, describe the population and methods used to elicit preferences for outcomes.                                                                                                                                                                                                                                                           | n/a                                            |
| Estimating costs and resources                         | 13a     | <i>Single study-based economic evaluation:</i> Describe approaches used to estimate resource use associated with the alternative interventions. Describe primary or secondary research methods for valuing each resource item in terms of its unit cost. Describe any adjustments made to approximate to opportunity costs.                           | page 7, line 1 to 24.                          |
| Currency, price date and conversion                    | 14      | Report the dates of the estimated resource quantities and unit costs. Describe methods for adjusting estimated unit costs to the year of reported costs if necessary. Describe methods for converting costs into a common currency base and the exchange rate.                                                                                        | page 8, line 12 to 13; table 2.                |
| Choice of model                                        | 15      | Describe and give reasons for the specific type of decision-analytical model used. Providing a figure to show model structure is strongly recommended.                                                                                                                                                                                                | Page 8, line 25 to 32.                         |
| Assumptions                                            | 16      | Describe all structural or other assumptions underpinning the decision-analytical model.                                                                                                                                                                                                                                                              | page 8, line 18 to 23.                         |
| Analytical methods                                     | 17      | Describe all analytical methods supporting the evaluation. This could include methods for dealing with skewed, missing, or censored data; extrapolation methods; methods for pooling data; approaches to validate or make adjustments (such as half cycle corrections) to a model; and methods for handling population heterogeneity and uncertainty. | page 8, line 18 to 23; page 9, line 1 to 7.    |
| <b>Results</b>                                         |         |                                                                                                                                                                                                                                                                                                                                                       |                                                |
| Study parameters                                       | 18      | Report the values, ranges, references, and, if used, probability distributions for all parameters. Report reasons or sources for distributions used to represent uncertainty where appropriate. Providing a table to show the input values is strongly recommended.                                                                                   | page 10, line 1 to 19; table 2 and 3; table S1 |
| Incremental costs and outcomes                         | 19      | For each intervention, report mean values for the main categories of estimated costs and outcomes of interest, as well as mean differences between the comparator groups. If applicable, report incremental cost-effectiveness ratios.                                                                                                                | page 10, line 22 to page 11, line 12; table 4; |
| Characterising uncertainty                             | 20a     | <i>Single study-based economic evaluation:</i> Describe the effects of sampling uncertainty for the estimated incremental cost and incremental effectiveness parameters, together with the impact of methodological assumptions (such as discount rate, study perspective).                                                                           | page 11, line 14 to 23.                        |

| Section/item                                                         | Item No | Recommendation                                                                                                                                                                                                                                                             | Reported on page No/line No                                   |
|----------------------------------------------------------------------|---------|----------------------------------------------------------------------------------------------------------------------------------------------------------------------------------------------------------------------------------------------------------------------------|---------------------------------------------------------------|
| Characterising heterogeneity                                         | 21      | If applicable, report differences in costs, outcomes, or cost-effectiveness that can be explained by variations between subgroups of patients with different baseline characteristics or other observed variability in effects that are not reducible by more information. | page 11, line 25 to page 12, line 12; page 13, line 19 to 27. |
| <i>Discussion</i>                                                    |         |                                                                                                                                                                                                                                                                            |                                                               |
| Study findings, limitations, generalisability, and current knowledge | 22      | Summarise key study findings and describe how they support the conclusions reached. Discuss limitations and the generalisability of the findings and how the findings fit with current knowledge.                                                                          | page 12, line 14 to page 14, line 21; page 15, line 20 to 30. |
| <i>Other</i>                                                         |         |                                                                                                                                                                                                                                                                            |                                                               |
| Source of funding                                                    | 23      | Describe how the study was funded and the role of the funder in the identification, design, conduct, and reporting of the analysis. Describe other non-monetary sources of support.                                                                                        | page 16, line 20 to 25.                                       |
| Conflicts of interest                                                | 24      | Describe any potential for conflict of interest of study contributors in accordance with journal policy. In the absence of a journal policy, we recommend authors comply with International Committee of Medical Journal Editors recommendations.                          | page 16, line 27 to page 17, line 2.                          |
