# Supplementary material for: Cost-effectiveness of an internet-based perioperative care programme to enhance postoperative recovery in gynaecological patients: economic evaluation alongside a stepped-wedge cluster-randomised trial
Source: PubMed Central journal article supplement — BMJ Open. 2018 Jan 21;8(1):e017782. doi: 10.1136/bmjopen-2017-017782 (PMC5780709; doi:10.1136/bmjopen-2017-017782), 2018-01-21
Supplement: bmjopen-2017-017782supp001.pdf [file bmjopen-2017-017782supp001.pdf]

**Supplementary table S1** Costs of the intervention care programme from the societal perspective, valued using a bottom-up micro-costing approach

| <b>Intervention component</b>         | <b>Cost category</b> | <b>Staff</b>            | <b>Units</b> | <b>Unit Price</b> | <b>Total costs (n=227)</b> | <b>Costs per patient</b> |
|---------------------------------------|----------------------|-------------------------|--------------|-------------------|----------------------------|--------------------------|
| <b>Implementation costs</b>           |                      |                         |              |                   |                            |                          |
| Training sessions<br>(care-managers)  | labour costs         | principal investigator  | 5 hours      | € 36.94           | € 184.69                   | € 0.81                   |
|                                       | labour costs         | occupational physicians | 18 hours     | € 89.68           | € 1,614.24                 | € 7.11                   |
|                                       | labour costs         | occupational therapist  | 2 hours      | € 46.32           | € 92.64                    | € 0.41                   |
|                                       | capital costs        |                         | 5 hours      | € 6.26            | € 31.29                    | € 0.14                   |
| Training sessions<br>(hospital staff) | labour costs         | principal investigator  | 38 hours     | € 36.94           | € 1,403.67                 | € 6.18                   |
|                                       | travel costs         | principal investigator  | 582 km       | € 0.22            | € 127.28                   | € 0.56                   |
|                                       | labour costs         | gynaecologists          | 18.9 hours   | € 107.30          | € 2,027.90                 | € 8.93                   |
|                                       | labour costs         | residents               | 18.9 hours   | € 42.58           | € 804.82                   | € 3.55                   |
|                                       | labour costs         | nurses                  | 45 hours     | € 42.64           | € 1,918.58                 | € 8.45                   |
|                                       | capital costs        |                         | 9 hours      | € 6.26            | € 56.33                    | € 0.25                   |
|                                       | printed materials    |                         |              |                   | € 821.00                   | € 3.62                   |
|                                       |                      |                         |              | <b>Subtotal</b>   | <b>€ 40.01</b>             |                          |
| <b>eHealth intervention</b>           |                      |                         |              |                   |                            |                          |
| Electronic approval                   | labour costs         | gynaecologists          | 14.2 hours   | € 107.30          | € 1,523.60                 | € 6.71                   |
|                                       | capital costs        |                         | 14.2 hours   | € 4.17            | € 59.15                    | € 0.26                   |
| Maintenance                           | labour costs         | computer specialist     | 12.2 hours   | € 37.82           | € 461.45                   | € 2.03                   |
|                                       | capital costs        |                         | 12.2 hours   | € 1.67            | € 20.33                    | € 0.09                   |
| Administrator time                    | labour costs         | research assistant      | 37.8 hours   | € 33.42           | € 1,263.23                 | € 5.56                   |
|                                       | capital costs        |                         | 37.8 hours   | € 4.17            | € 157.46                   | € 0.69                   |
| Website hosting                       | other                |                         | 40 months    | € 18.84           | € 578.88                   | € 2.55                   |
|                                       |                      |                         |              | <b>Subtotal</b>   | <b>€ 17.90</b>             |                          |
| <b>Occupational intervention</b>      |                      |                         |              |                   |                            |                          |
| Pre-operative consultations           | labour costs         | occupational physicians | 7.9 hours    | € 89.68           | € 708.47                   | € 3.12                   |

|                                 |               |                         |              |         |                 |                     |
|---------------------------------|---------------|-------------------------|--------------|---------|-----------------|---------------------|
|                                 | capital costs |                         | 7.9 hours    | € 4.17  | € 32.91         | € 0.14              |
|                                 | phone costs   |                         | 413 minutes  | € 0.09  | € 38.71         | € 0.17              |
| Post-operative consultations    | labour costs  | occupational physicians | 37.5 hours   | € 89.68 | € 3.363.00      | € 14.81             |
|                                 | capital costs |                         | 37.5 hours   | € 4.17  | € 156.21        | € 0.69              |
|                                 | phone costs   |                         | 2083 minutes | € 0.09  | € 195.23        | € 0.86              |
| Workplace intervention          | labour costs  | occupational therapist  | 4 hours      | € 46.32 | € 185.29        | € 0.82              |
|                                 | capital costs |                         | 3 hours      | € 6.26  | € 18.78         | € 0.08              |
|                                 | labour costs  | employer                | 2 hours      | € 83.69 | € 167.37        | € 0.74              |
|                                 | travel costs  | occupational therapist  | 110 km       | € 0.22  | € 24.06         | € 0.11              |
|                                 |               |                         |              |         | <b>Subtotal</b> | <b>€ 21.54</b>      |
| <b>Developmental costs</b>      |               |                         |              |         | € 33,873.55     | € 0.56 <sup>§</sup> |
|                                 |               |                         |              |         | <b>Subtotal</b> | <b>€ 0.56</b>       |
| <b>TOTAL intervention costs</b> |               |                         |              |         |                 | <b>€ 80.02</b>      |

Costs are expressed in 2014 Euros (€1.00 = £0.85; \$1.06).

<sup>§</sup> € 33,873.55 was paid for the development of the intervention care-programme. For calculating the development costs per participant, these were divided by the expected number of users during the first five years after implementation (60,200). Per year 20,000 gynaecologic surgeries (LAS, TLH, VH, AH) are being performed in the Netherlands and based on the outcomes of an earlier performed process-evaluation we hypothesized a reach of 60.2%.<sup>42</sup>
