# Supplementary material for: Cost-effectiveness of an internet-based perioperative care programme to enhance postoperative recovery in gynaecological patients: economic evaluation alongside a stepped-wedge cluster-randomised trial
Source: PubMed Central journal article supplement — BMJ Open. 2018 Jan 21;8(1):e017782. doi: 10.1136/bmjopen-2017-017782 (PMC5780709; doi:10.1136/bmjopen-2017-017782), 2018-01-21
Supplement: bmjopen-2017-017782supp002.pdf [file bmjopen-2017-017782supp002.pdf]

**Supplementary table S2** Differences in pooled means costs and effects, incremental cost-effectiveness ratios and the distribution of incremental cost-effectiveness pairs around the quadrants of the cost-effectiveness plane

| Analysis                              | Sample size |     | $\Delta$ Cost* (€)<br>mean (95% CI) | $\Delta$ Effect* (days)<br>mean (95% CI) | ICER<br>€/day | Distribution CE-plane |                 |                 |                 |  |
|---------------------------------------|-------------|-----|-------------------------------------|------------------------------------------|---------------|-----------------------|-----------------|-----------------|-----------------|--|
|                                       | IC          | UC  |                                     |                                          |               | NE <sup>1</sup>       | SE <sup>2</sup> | SW <sup>3</sup> | NW <sup>4</sup> |  |
| <b>QALYs</b>                          |             |     |                                     |                                          |               |                       |                 |                 |                 |  |
| Intention to treat                    | 227         | 206 | -647 (-2116 to 735)                 | -0.001 (-0.023 to 0.020)                 | 501187        | 4%                    | 42%             | 35%             | 19%             |  |
| Per-protocol analysis                 | 205         | 188 | -1148 (-2611 to 162)                | 0.003 (-0.019 to 0.024)                  | -432881       | 1%                    | 59%             | 34%             | 6%              |  |
| Complete-case analysis                | 132         | 136 | -1607 (-3421 to 52)                 | 0.009 (-0.013 to 0.033)                  | -202816       | 1%                    | 72%             | 24%             | 3%              |  |
| Friction cost approach                | 227         | 206 | -825 (-2209 to 470)                 | -0.001 (-0.023 to 0.020)                 | 639131        | 2%                    | 44%             | 42%             | 12%             |  |
| Healthcare perspective                | 227         | 206 | -61 (-361 to 218)                   | -0.001 (-0.023 to 0.020)                 | 46942         | 13%                   | 33%             | 28%             | 26%             |  |
| <b>SF-36 PHYSICAL COMPONENT SCORE</b> |             |     |                                     |                                          |               |                       |                 |                 |                 |  |
| Intention to treat                    | 227         | 206 | -647 (-2116 to 735)                 | -0.7 (-2.6 to 1.1)                       | 870           | 6%                    | 19%             | 58%             | 17%             |  |
| Per-protocol analysis                 | 205         | 188 | -1148 (-2611 to 162)                | -0.9 (-2.8 to 1.1)                       | 1350          | 2%                    | 21%             | 71%             | 6%              |  |
| Complete-case analysis                | 153         | 149 | -1689 (-3316 to -231)               | -1.2 (-3.3 to 0.8)                       | 1389          | 0%                    | 12%             | 86%             | 2%              |  |
| Friction cost approach                | 227         | 206 | -825 (-2209 to 470)                 | -0.7 (-2.6 to 1.1)                       | 1109          | 4%                    | 21%             | 64%             | 11%             |  |
| Healthcare perspective                | 227         | 206 | -61 (-361 to 218)                   | -0.7 (-2.6 to 1.1)                       | 81            | 8%                    | 17%             | 44%             | 31%             |  |
| <b>SF-36 MENTAL COMPONENT SCALE</b>   |             |     |                                     |                                          |               |                       |                 |                 |                 |  |
| Intention to treat                    | 227         | 206 | -647 (-2116 to 735)                 | -0.4 (-2.5 to 1.7)                       | 1573          | 10%                   | 33%             | 44%             | 13%             |  |
| Per-protocol analysis                 | 205         | 188 | -1148 (-2611 to 162)                | -0.5 (-2.7 to 1.7)                       | 2198          | 2%                    | 32%             | 61%             | 5%              |  |
| Complete-case analysis                | 153         | 149 | -1689 (-3316 to -231)               | -0.1 (-2.6 to 1.9)                       | 12598         | 1%                    | 49%             | 49%             | 1%              |  |
| Friction cost approach                | 227         | 206 | -825 (-2209 to 470)                 | -0.4 (-2.5 to 1.7)                       | 2006          | 6%                    | 37%             | 49%             | 8%              |  |
| Healthcare perspective                | 227         | 206 | -61 (-361 to 218)                   | -0.4 (-2.5 to 1.7)                       | 147           | 17%                   | 26%             | 35%             | 22%             |  |
| <b>RECOVERY INDEX</b>                 |             |     |                                     |                                          |               |                       |                 |                 |                 |  |
| Intention to treat                    | 227         | 206 | -647 (-2116 to 735)                 | -0.6 (-2.0 to 0.9)                       | 1127          | 5%                    | 22%             | 55%             | 18%             |  |
| Per-protocol analysis                 | 205         | 188 | -1148 (-2611 to 162)                | -0.7 (-2.1 to 0.8)                       | 1786          | 1%                    | 23%             | 70%             | 6%              |  |
| Complete-case analysis                | 153         | 149 | -1689 (-3316 to -231)               | -0.7 (-2.2 to 0.7)                       | 2562          | 1%                    | 20%             | 78%             | 1%              |  |
| Friction cost approach                | 227         | 206 | -825 (-2209 to 470)                 | -0.6 (-2.0 to 0.9)                       | 1437          | 3%                    | 24%             | 62%             | 12%             |  |
| Healthcare perspective                | 227         | 206 | -61 (-361 to 218)                   | -0.6 (-2.0 to 0.9)                       | 106           | 8%                    | 19%             | 42%             | 31%             |  |

---

\* uncertainty estimated using bootstrapping and corrected for clustering by hospital and type of surgery

<sup>1</sup> Refers to the northeast quadrant of the CE-plane, indicating that the intervention care programme is more effective and more costly than usual care.

<sup>2</sup> Refers to the southeast quadrant of the CE-plane, indicating that the intervention care programme is more effective and less costly than usual care.

<sup>3</sup> Refers to the southwest quadrant of the CE-plane, indicating that the intervention care programme is less effective and less costly than usual care.

<sup>4</sup> Refers to the northwest quadrant of the CE-plane, indicating that the intervention care programme is less effective and more costly than usual care.

IC, intervention care; UC, usual care; ICER, Incremental Cost-effectiveness Ratio; CE plane, cost-effectiveness plane.

---
